# Supplementary material for: Social class and wise reasoning about interpersonal conflicts across regions, persons and situations
Source: PubMed Central journal article supplement (PMC5745406; doi:10.1098/rspb.2017.1870), 2017-12-20

# Wise Reasoning and Social Class Analyses

*Igor Grossmann*

*Aug 20, 2017*

```
require(foreign)
```

```
## Loading required package: foreign
```

```
## Warning: package 'foreign' was built under R version 3.3.3
```

```
library(psych)
```

```
## Warning: package 'psych' was built under R version 3.3.3
```

```
library(ggplot2)
```

```
## Warning: package 'ggplot2' was built under R version 3.3.3
```

```
##  
## Attaching package: 'ggplot2'
```

```
## The following objects are masked from 'package:psych':  
##  
## %+%, alpha
```

```
library(lme4)
```

```
## Warning: package 'lme4' was built under R version 3.3.3
```

```
## Loading required package: Matrix
```

```
library(lmerTest)
```

```
## Warning: package 'lmerTest' was built under R version 3.3.3
```

```
##  
## Attaching package: 'lmerTest'
```

```
## The following object is masked from 'package:lme4':  
##  
##   lmer
```

```
## The following object is masked from 'package:stats':  
##  
##   step
```

```
library(lavaan)
```

```
## Warning: package 'lavaan' was built under R version 3.3.3
```

```
## This is lavaan 0.5-23.1097
```

```
## lavaan is BETA software! Please report any bugs.
```

```
##  
## Attaching package: 'lavaan'
```

```
## The following object is masked from 'package:psych':  
##  
##   cor2cov
```

```
library(plyr)
```

```
## Warning: package 'plyr' was built under R version 3.3.3
```

```
library(dplyr)
```

```
## Warning: package 'dplyr' was built under R version 3.3.3
```

```
##  
## Attaching package: 'dplyr'
```

```
## The following objects are masked from 'package:plyr':  
##  
##   arrange, count, desc, failwith, id, mutate, rename, summarise,  
##   summarize
```

```
## The following objects are masked from 'package:stats':  
##  
##   filter, lag
```

```
## The following objects are masked from 'package:base':  
##  
## intersect, setdiff, setequal, union
```

```
library(apaTables)  
library(QuantPsyc)
```

```
## Warning: package 'QuantPsyc' was built under R version 3.3.3
```

```
## Loading required package: boot
```

```
## Warning: package 'boot' was built under R version 3.3.3
```

```
##  
## Attaching package: 'boot'
```

```
## The following object is masked from 'package:psych':  
##  
## logit
```

```
## Loading required package: MASS
```

```
## Warning: package 'MASS' was built under R version 3.3.3
```

```
##  
## Attaching package: 'MASS'
```

```
## The following object is masked from 'package:dplyr':  
##  
## select
```

```
##  
## Attaching package: 'QuantPsyc'
```

```
## The following object is masked from 'package:Matrix':  
##  
## norm
```

```
## The following object is masked from 'package:base':  
##  
## norm
```

```
library(reshape2)
```

```
## Warning: package 'reshape2' was built under R version 3.3.3
```

```
library(mediation)
```

```
## Loading required package: mvtnorm
```

```
## Loading required package: sandwich
```

```
## mediation: Causal Mediation Analysis  
## Version: 4.4.5
```

```
##  
## Attaching package: 'mediation'
```

```
## The following object is masked from 'package:psych':  
##  
## mediate
```

```
library(lsmeans)
```

```
## Warning: package 'lsmeans' was built under R version 3.3.3
```

```
## Loading required package: estimability
```

```
##  
## Attaching package: 'lsmeans'
```

```
## The following object is masked from 'package:lmerTest':  
##  
## lsmeans
```

```
options(scipen=999)  
#read in the correct file (only first 7 samples, with the same presentation order: wisdom comes first)  
mrb<-read.spss(choose.files(), to.data.frame=TRUE, use.value.labels=F)
```

```
## Warning in read.spss(choose.files(), to.data.frame = TRUE, use.value.labels  
## = F): C:\Users\igrossma\Google Drive\Drive\scales\social class\7  
## samples.wisdom first order.apr18.2017.abridged.sav: Unrecognized record  
## type 7, subtype 14 encountered in system file
```

```
## Warning in read.spss(choose.files(), to.data.frame = TRUE, use.value.labels
## = F): C:\Users\igrossma\Google Drive\Drive\scales\social class\7
## samples.wisdom first order.apr18.2017.abridged.sav: Unrecognized record
## type 7, subtype 17 encountered in system file
```

```
## Warning in read.spss(choose.files(), to.data.frame = TRUE, use.value.labels
## = F): C:\Users\igrossma\Google Drive\Drive\scales\social class\7
## samples.wisdom first order.apr18.2017.abridged.sav: Unrecognized record
## type 7, subtype 18 encountered in system file
```

select subsamples that: - only completed wise reasoning measure first (no possible carry-over effects), samples >7 have manipulation, hence excluded - did not repeat the study (based on duplicate check (based on IPs))

```
mrbclean <- mrb[ which(mrb$presentationorder=='1' &
                      mrb$sampleIG <8 & mrb$filter.dup==0) , ]
mrbclean$SAT<-((mrbclean$SAT2014)+(mrbclean$SAT2015))/2
#calculate SAT scores across two years in whcih study was conducted
mrbclean1 <- subset(mrbclean, filter.dup=="0"|filter.dup=="NA",
select=c(w1,w2,w3,w4,w5,w6,w7,w8,w9,w10,w11,w12,w13,w14,w15,w16,w17,w18,w19,w20,w21,
WorriedMoney, Uninsured,Edu,Income,Gender,OccPres, Age, Population,
status, State, closebefor, BIDRFull, EIOthersEmotions , EIEmotionReg,SAT ))
#subset data for fitting SEM model
mrbshort <- mrbclean1[c(1:25,27)] #subset data for fitting SEM model
```

## Examine model fit of wise reasoning and social class latent factors .

## FIRST, EXPLORATORY ANALYSIS OF SOCIAL STATUS (just for information)

```
factanal(~WorriedMoney+Uninsured+OccPres+Edu+log(Income), factors=2,
         data=mrbclean1, rotation="Promax")
```

```

##
## Call:
## factanal(x = ~WorriedMoney + Uninsured + OccPres + Edu + log(Income),      factors = 2, data =
mrbclean1, rotation = "Promax")
##
## Uniquenesses:
## WorriedMoney      Uninsured      OccPres      Edu  log(Income)
##      0.952      0.827      0.372      0.005      0.944
##
## Loadings:
##      Factor1 Factor2
## WorriedMoney      -0.219
## Uninsured      -0.414
## OccPres      0.797
## Edu      1.002
## log(Income)  0.205
##
##      Factor1 Factor2
## SS loadings      1.047  0.863
## Proportion Var  0.209  0.173
## Cumulative Var  0.209  0.382
##
## Factor Correlations:
##      Factor1 Factor2
## Factor1  1.000 -0.149
## Factor2 -0.149  1.000
##
## Test of the hypothesis that 2 factors are sufficient.
## The chi square statistic is 1.11 on 1 degree of freedom.
## The p-value is 0.293

```

==> 2 factors seem appropriate and structure into state-level and individual factors. ##EXPLORATORY ANALYSIS OF WISE REASONING

*#results suggest a consistent pattern with apriori hypothesized results. One notable exception, #item w8 appears to belong to humility rather than change*

```

factanal(~w1+w2+w3+w4+w5+w6+w7+w8+w9+w10+w11+w12+w13+w14+w15+w16+w17+w18
+w19+w20+w21, factors=5, data=mrbshort, rotation="Promax")

```



```
#overall, 5 model wise reasoning construct looks good
```

# TEST STRUCTURAL MODELS OF WISE REASONING.

model with wisdom-related items feeding into 5 factors, which in turn feed into a second-order factor also, SES at state and individual levels

```
w.model<-  
'persp =~ w1+ w2+ w3+ w4  
change=~w5+w6+w7+w8  
humility=~w9+ w10+ w11+ w12  
comprres=~w13+ w14+ w15+w16+w17  
outsider=~w18+w19+ w20+ w21  
wow=~persp+change+humility+comprres+outsider  
class=~WorriedMoney+Uninsured+OccPres  
pclass=~Edu+Income'  
  
fit <- cfa(w.model, data = mrbshort, missing = "ML")  
fitMeasures(fit, c("chisq", "df", "pvalue", "cfi", "tli","aic","bic",  
"rmsea","rmsea.ci.lower","rmsea.ci.upper"))
```

|    |            |            |        |                |                |
|----|------------|------------|--------|----------------|----------------|
| ## | chisq      | df         | pvalue | cfi            | tli            |
| ## | 2657.277   | 291.000    | 0.000  | 0.896          | 0.884          |
| ## | aic        | bic        | rmsea  | rmsea.ci.lower | rmsea.ci.upper |
| ## | 167859.714 | 168347.411 | 0.062  | 0.059          | 0.064          |

```
#very decent model with acceptable indices.
```

## IMPROVE MODEL FIT WITH MODIFICATION INDICES

```
modindices(fit, power=T, sort.=T) #suggestion to correlate residuals
```



| ##     | lhs op      | rhs      | mi      | epc    | sepc.all | delta | ncp    |
|--------|-------------|----------|---------|--------|----------|-------|--------|
| ## 555 | w16 ~~      | w17      | 528.463 | 0.462  | 0.348    | 0.1   | 24.758 |
| ## 420 | w7 ~~       | w8       | 468.119 | 0.505  | 0.355    | 0.1   | 18.334 |
| ## 380 | w5 ~~       | w7       | 226.364 | -0.333 | -0.236   | 0.1   | 20.451 |
| ## 519 | w13 ~~      | w14      | 174.171 | 0.237  | 0.160    | 0.1   | 31.045 |
| ## 401 | w6 ~~       | w8       | 166.769 | -0.286 | -0.202   | 0.1   | 20.356 |
| ## 286 | w1 ~~       | w3       | 131.415 | 0.199  | 0.151    | 0.1   | 33.200 |
| ## 379 | w5 ~~       | w6       | 126.049 | 0.294  | 0.209    | 0.1   | 14.631 |
| ## 173 | compres =~  | w5       | 106.307 | 0.389  | 0.310    | 0.1   | 7.021  |
| ## 457 | w9 ~~       | w10      | 95.960  | 0.288  | 0.164    | 0.1   | 11.591 |
| ## 439 | w8 ~~       | w9       | 92.088  | 0.217  | 0.143    | 0.1   | 19.599 |
| ## 522 | w13 ~~      | w17      | 89.008  | -0.161 | -0.122   | 0.1   | 34.167 |
| ## 216 | wow =~      | w5       | 84.983  | 0.639  | 0.380    | 0.1   | 2.084  |
| ## 624 | humility ~~ | outsider | 74.262  | 0.152  | 0.163    | 0.1   | 32.127 |
| ## 154 | humility =~ | w8       | 66.291  | 0.361  | 0.263    | 0.1   | 5.074  |
| ## 628 | compres ~~  | outsider | 63.326  | -0.137 | -0.136   | 0.1   | 33.910 |
| ## 381 | w5 ~~       | w8       | 63.079  | -0.177 | -0.124   | 0.1   | 20.234 |
| ## 105 | persp =~    | w7       | 58.984  | -0.310 | -0.222   | 0.1   | 6.135  |
| ## 170 | compres =~  | w2       | 58.651  | 0.314  | 0.245    | 0.1   | 5.958  |
| ## 218 | wow =~      | w7       | 55.170  | -0.490 | -0.292   | 0.1   | 2.302  |
| ## 137 | change =~   | w17      | 54.401  | 0.256  | 0.215    | 0.1   | 8.277  |
| ## 152 | humility =~ | w6       | 53.758  | -0.309 | -0.229   | 0.1   | 5.647  |
| ## 618 | change ~~   | compres  | 52.537  | 0.116  | 0.133    | 0.1   | 39.175 |
| ## 217 | wow =~      | w6       | 50.963  | -0.498 | -0.298   | 0.1   | 2.057  |
| ## 400 | w6 ~~       | w7       | 50.391  | 0.157  | 0.112    | 0.1   | 20.414 |
| ## 203 | outsider =~ | w14      | 49.817  | -0.140 | -0.122   | 0.1   | 25.244 |
| ## 103 | persp =~    | w5       | 49.710  | 0.280  | 0.200    | 0.1   | 6.345  |
| ## 231 | wow =~      | w20      | 46.241  | -0.221 | -0.118   | 0.1   | 9.443  |
| ## 214 | wow =~      | w3       | 44.461  | -0.530 | -0.322   | 0.1   | 1.582  |
| ## 183 | compres =~  | w20      | 44.026  | -0.148 | -0.106   | 0.1   | 20.018 |
| ## 175 | compres =~  | w7       | 43.795  | -0.250 | -0.199   | 0.1   | 7.017  |
| ## 521 | w13 ~~      | w16      | 43.170  | -0.127 | -0.087   | 0.1   | 26.733 |
| ## 104 | persp =~    | w6       | 40.465  | -0.252 | -0.181   | 0.1   | 6.371  |
| ## 118 | persp =~    | w20      | 40.002  | -0.156 | -0.099   | 0.1   | 16.448 |
| ## 534 | w14 ~~      | w17      | 39.579  | -0.106 | -0.079   | 0.1   | 35.181 |
| ## 215 | wow =~      | w4       | 38.131  | 0.483  | 0.287    | 0.1   | 1.636  |
| ## 197 | outsider =~ | w8       | 37.802  | 0.153  | 0.135    | 0.1   | 16.226 |
| ## 163 | humility =~ | w21      | 37.692  | 0.170  | 0.113    | 0.1   | 13.094 |
| ## 162 | humility =~ | w20      | 36.555  | -0.153 | -0.101   | 0.1   | 15.644 |
| ## 610 | persp ~~    | change   | 36.404  | -0.085 | -0.108   | 0.1   | 50.755 |
| ## 225 | wow =~      | w14      | 35.403  | -0.559 | -0.323   | 0.1   | 1.131  |
| ## 127 | change =~   | w3       | 34.575  | -0.178 | -0.141   | 0.1   | 10.965 |
| ## 125 | change =~   | w1       | 34.263  | -0.183 | -0.150   | 0.1   | 10.203 |
| ## 219 | wow =~      | w8       | 32.207  | 0.386  | 0.227    | 0.1   | 2.163  |
| ## 213 | wow =~      | w2       | 30.612  | 0.464  | 0.270    | 0.1   | 1.425  |
| ## 576 | w18 ~~      | w21      | 30.429  | -0.107 | -0.061   | 0.1   | 26.778 |
| ## 172 | compres =~  | w4       | 30.232  | 0.206  | 0.164    | 0.1   | 7.103  |
| ## 533 | w14 ~~      | w16      | 30.231  | -0.104 | -0.070   | 0.1   | 27.763 |
| ## 451 | w8 ~~       | w21      | 29.936  | 0.108  | 0.068    | 0.1   | 25.809 |
| ## 623 | humility ~~ | compres  | 29.249  | -0.089 | -0.108   | 0.1   | 36.587 |
| ## 156 | humility =~ | w14      | 28.941  | -0.239 | -0.171   | 0.1   | 5.087  |
| ## 490 | w11 ~~      | w12      | 27.100  | 0.124  | 0.087    | 0.1   | 17.693 |
| ## 287 | w1 ~~       | w4       | 26.821  | -0.088 | -0.065   | 0.1   | 34.627 |

|        |             |          |        |        |        |     |        |
|--------|-------------|----------|--------|--------|--------|-----|--------|
| ## 200 | outsider =~ | w11      | 26.741 | 0.116  | 0.107  | 0.1 | 19.783 |
| ## 285 | w1 =~       | w2       | 26.517 | -0.094 | -0.068 | 0.1 | 30.321 |
| ## 153 | humility =~ | w7       | 25.715 | -0.217 | -0.160 | 0.1 | 5.480  |
| ## 128 | change =~   | w4       | 25.167 | 0.165  | 0.128  | 0.1 | 9.246  |
| ## 171 | comprres =~ | w3       | 24.062 | -0.178 | -0.145 | 0.1 | 7.578  |
| ## 458 | w9 =~       | w11      | 23.594 | -0.127 | -0.087 | 0.1 | 14.590 |
| ## 232 | wow =~      | w21      | 22.121 | 0.166  | 0.090  | 0.1 | 7.996  |
| ## 589 | w20 =~      | w21      | 21.747 | 0.094  | 0.054  | 0.1 | 24.831 |
| ## 141 | change =~   | w21      | 21.607 | 0.116  | 0.082  | 0.1 | 16.033 |
| ## 151 | humility =~ | w5       | 21.478 | 0.195  | 0.144  | 0.1 | 5.627  |
| ## 130 | change =~   | w10      | 19.962 | -0.222 | -0.147 | 0.1 | 4.043  |
| ## 221 | wow =~      | w10      | 19.622 | -0.549 | -0.278 | 0.1 | 0.651  |
| ## 206 | outsider =~ | w17      | 18.172 | 0.093  | 0.090  | 0.1 | 21.137 |
| ## 468 | w9 =~       | w21      | 18.120 | 0.080  | 0.048  | 0.1 | 28.380 |
| ## 565 | w17 =~      | w18      | 17.966 | 0.073  | 0.049  | 0.1 | 34.101 |
| ## 150 | humility =~ | w4       | 17.857 | 0.179  | 0.131  | 0.1 | 5.581  |
| ## 140 | change =~   | w20      | 17.761 | -0.096 | -0.066 | 0.1 | 19.378 |
| ## 178 | comprres =~ | w10      | 17.630 | -0.244 | -0.165 | 0.1 | 2.968  |
| ## 226 | wow =~      | w15      | 17.597 | 0.392  | 0.229  | 0.1 | 1.147  |
| ## 357 | w4 =~       | w5       | 16.351 | 0.064  | 0.045  | 0.1 | 39.729 |
| ## 316 | w2 =~       | w9       | 16.321 | -0.085 | -0.056 | 0.1 | 22.543 |
| ## 459 | w9 =~       | w12      | 16.037 | -0.103 | -0.066 | 0.1 | 15.139 |
| ## 169 | comprres =~ | w1       | 15.818 | -0.142 | -0.119 | 0.1 | 7.869  |
| ## 290 | w1 =~       | w7       | 15.634 | -0.068 | -0.051 | 0.1 | 33.435 |
| ## 126 | change =~   | w2       | 15.140 | 0.143  | 0.108  | 0.1 | 7.437  |
| ## 612 | persp =~    | comprres | 14.599 | 0.061  | 0.076  | 0.1 | 39.565 |
| ## 157 | humility =~ | w15      | 14.505 | 0.172  | 0.124  | 0.1 | 4.902  |
| ## 149 | humility =~ | w3       | 14.372 | -0.153 | -0.115 | 0.1 | 6.169  |
| ## 184 | comprres =~ | w21      | 14.089 | 0.092  | 0.066  | 0.1 | 16.788 |
| ## 134 | change =~   | w14      | 14.052 | -0.124 | -0.094 | 0.1 | 9.098  |
| ## 161 | humility =~ | w19      | 13.747 | 0.096  | 0.065  | 0.1 | 14.790 |
| ## 429 | w7 =~       | w17      | 13.536 | 0.070  | 0.054  | 0.1 | 27.430 |
| ## 202 | outsider =~ | w13      | 13.266 | -0.075 | -0.066 | 0.1 | 23.715 |
| ## 117 | persp =~    | w19      | 13.158 | 0.092  | 0.060  | 0.1 | 15.531 |
| ## 461 | w9 =~       | w14      | 12.913 | -0.063 | -0.041 | 0.1 | 32.851 |
| ## 198 | outsider =~ | w9       | 12.433 | 0.088  | 0.074  | 0.1 | 15.996 |
| ## 321 | w2 =~       | w14      | 11.408 | 0.057  | 0.038  | 0.1 | 35.032 |
| ## 136 | change =~   | w16      | 11.017 | 0.131  | 0.100  | 0.1 | 6.383  |
| ## 174 | comprres =~ | w6       | 10.867 | -0.124 | -0.100 | 0.1 | 7.020  |
| ## 212 | wow =~      | w1       | 10.862 | -0.244 | -0.153 | 0.1 | 1.819  |
| ## 402 | w6 =~       | w9       | 10.765 | -0.061 | -0.041 | 0.1 | 29.279 |
| ## 111 | persp =~    | w13      | 10.243 | 0.132  | 0.092  | 0.1 | 5.922  |
| ## 574 | w18 =~      | w19      | 9.879  | 0.061  | 0.035  | 0.1 | 26.440 |
| ## 520 | w13 =~      | w15      | 9.334  | -0.054 | -0.037 | 0.1 | 31.855 |
| ## 176 | comprres =~ | w8       | 9.219  | 0.119  | 0.094  | 0.1 | 6.519  |
| ## 582 | w19 =~      | w20      | 8.961  | -0.063 | -0.036 | 0.1 | 22.396 |
| ## 195 | outsider =~ | w6       | 8.930  | -0.062 | -0.056 | 0.1 | 23.038 |
| ## 426 | w7 =~       | w14      | 8.846  | -0.051 | -0.035 | 0.1 | 33.995 |
| ## 410 | w6 =~       | w17      | 8.662  | 0.048  | 0.037  | 0.1 | 36.954 |
| ## 320 | w2 =~       | w13      | 8.587  | 0.051  | 0.035  | 0.1 | 32.503 |
| ## 312 | w2 =~       | w5       | 8.474  | 0.053  | 0.037  | 0.1 | 30.073 |
| ## 107 | persp =~    | w9       | 8.430  | 0.157  | 0.106  | 0.1 | 3.410  |
| ## 505 | w12 =~      | w13      | 8.281  | 0.055  | 0.037  | 0.1 | 27.336 |
| ## 228 | wow =~      | w17      | 8.271  | 0.262  | 0.169  | 0.1 | 1.209  |

|        |             |              |       |        |        |     |        |
|--------|-------------|--------------|-------|--------|--------|-----|--------|
| ## 230 | wow ==      | w19          | 8.004 | 0.094  | 0.051  | 0.1 | 8.993  |
| ## 430 | w7 ==       | w18          | 7.974 | 0.054  | 0.034  | 0.1 | 27.728 |
| ## 474 | w10 ==      | w11          | 7.942 | -0.076 | -0.047 | 0.1 | 13.790 |
| ## 135 | change ==   | w15          | 7.877 | 0.096  | 0.073  | 0.1 | 8.547  |
| ## 536 | w14 ==      | w19          | 7.828 | -0.039 | -0.025 | 0.1 | 50.825 |
| ## 513 | w12 ==      | w21          | 7.698 | 0.055  | 0.034  | 0.1 | 25.137 |
| ## 387 | w5 ==       | w14          | 7.678 | 0.042  | 0.029  | 0.1 | 44.096 |
| ## 425 | w7 ==       | w13          | 7.589 | -0.049 | -0.034 | 0.1 | 31.535 |
| ## 444 | w8 ==       | w14          | 7.520 | -0.050 | -0.034 | 0.1 | 30.457 |
| ## 113 | persp ==    | w15          | 7.504 | 0.114  | 0.080  | 0.1 | 5.794  |
| ## 481 | w10 ==      | w18          | 7.427 | -0.065 | -0.035 | 0.1 | 17.426 |
| ## 334 | w3 ==       | w4           | 7.362 | -0.050 | -0.036 | 0.1 | 29.477 |
| ## 270 | pclass ==   | w10          | 7.254 | 0.248  | 0.087  | 0.1 | 1.176  |
| ## 292 | w1 ==       | w9           | 6.839 | 0.046  | 0.032  | 0.1 | 32.619 |
| ## 544 | w15 ==      | w16          | 6.793 | -0.051 | -0.035 | 0.1 | 25.920 |
| ## 114 | persp ==    | w16          | 6.467 | -0.120 | -0.084 | 0.1 | 4.487  |
| ## 346 | w3 ==       | w16          | 6.423 | -0.041 | -0.029 | 0.1 | 39.131 |
| ## 475 | w10 ==      | w12          | 6.346 | -0.075 | -0.044 | 0.1 | 11.203 |
| ## 119 | persp ==    | w21          | 6.328 | 0.068  | 0.044  | 0.1 | 13.740 |
| ## 177 | compres ==  | w9           | 6.313 | -0.134 | -0.101 | 0.1 | 3.516  |
| ## 342 | w3 ==       | w12          | 6.240 | -0.042 | -0.029 | 0.1 | 36.013 |
| ## 311 | w2 ==       | w4           | 6.226 | 0.048  | 0.033  | 0.1 | 27.457 |
| ## 535 | w14 ==      | w18          | 6.219 | -0.038 | -0.023 | 0.1 | 42.403 |
| ## 299 | w1 ==       | w16          | 6.208 | -0.044 | -0.033 | 0.1 | 31.381 |
| ## 361 | w4 ==       | w9           | 6.198 | 0.046  | 0.030  | 0.1 | 29.716 |
| ## 622 | change ==   | pclass       | 6.127 | -0.037 | -0.082 | 0.1 | 44.743 |
| ## 267 | pclass ==   | w7           | 5.945 | -0.178 | -0.074 | 0.1 | 1.880  |
| ## 222 | wow ==      | w11          | 5.942 | 0.290  | 0.178  | 0.1 | 0.704  |
| ## 310 | w2 ==       | w3           | 5.677 | -0.043 | -0.030 | 0.1 | 30.820 |
| ## 106 | persp ==    | w8           | 5.640 | 0.100  | 0.070  | 0.1 | 5.676  |
| ## 431 | w7 ==       | w19          | 5.597 | -0.041 | -0.027 | 0.1 | 33.248 |
| ## 480 | w10 ==      | w17          | 5.164 | -0.055 | -0.036 | 0.1 | 17.223 |
| ## 336 | w3 ==       | w6           | 5.064 | -0.030 | -0.022 | 0.1 | 55.556 |
| ## 428 | w7 ==       | w16          | 5.058 | 0.049  | 0.034  | 0.1 | 20.942 |
| ## 315 | w2 ==       | w8           | 5.036 | -0.049 | -0.034 | 0.1 | 20.585 |
| ## 489 | w10 ==      | Income       | 4.972 | 0.117  | 0.046  | 0.1 | 3.605  |
| ## 462 | w9 ==       | w15          | 4.963 | 0.041  | 0.027  | 0.1 | 29.406 |
| ## 412 | w6 ==       | w19          | 4.882 | -0.033 | -0.021 | 0.1 | 44.911 |
| ## 611 | persp ==    | humility     | 4.826 | 0.032  | 0.043  | 0.1 | 48.438 |
| ## 497 | w11 ==      | w19          | 4.809 | 0.034  | 0.023  | 0.1 | 40.923 |
| ## 297 | w1 ==       | w14          | 4.599 | -0.030 | -0.022 | 0.1 | 50.665 |
| ## 347 | w3 ==       | w17          | 4.493 | -0.030 | -0.023 | 0.1 | 51.175 |
| ## 366 | w4 ==       | w14          | 4.375 | 0.031  | 0.021  | 0.1 | 46.152 |
| ## 617 | change ==   | humility     | 4.156 | -0.031 | -0.039 | 0.1 | 42.440 |
| ## 302 | w1 ==       | w19          | 4.119 | 0.029  | 0.020  | 0.1 | 49.878 |
| ## 507 | w12 ==      | w15          | 4.110 | -0.040 | -0.027 | 0.1 | 26.229 |
| ## 190 | outsider == | w1           | 4.013 | 0.039  | 0.037  | 0.1 | 25.758 |
| ## 515 | w12 ==      | Uninsured    | 3.981 | -0.186 | -0.035 | 0.1 | 1.150  |
| ## 496 | w11 ==      | w18          | 3.917 | 0.034  | 0.022  | 0.1 | 34.141 |
| ## 325 | w2 ==       | w18          | 3.829 | 0.037  | 0.023  | 0.1 | 28.594 |
| ## 575 | w18 ==      | w20          | 3.818 | 0.040  | 0.022  | 0.1 | 23.930 |
| ## 392 | w5 ==       | w19          | 3.760 | 0.029  | 0.019  | 0.1 | 43.546 |
| ## 549 | w15 ==      | w21          | 3.745 | 0.031  | 0.019  | 0.1 | 39.189 |
| ## 395 | w5 ==       | WorriedMoney | 3.737 | -0.055 | -0.030 | 0.1 | 12.361 |

|        |             |              |       |        |        |     |        |
|--------|-------------|--------------|-------|--------|--------|-----|--------|
| ## 467 | w9 ~        | w20          | 3.718 | -0.032 | -0.019 | 0.1 | 35.726 |
| ## 263 | pclass =~   | w3           | 3.717 | 0.103  | 0.044  | 0.1 | 3.493  |
| ## 386 | w5 ~        | w13          | 3.715 | 0.030  | 0.021  | 0.1 | 41.014 |
| ## 438 | w7 ~        | Income       | 3.568 | -0.079 | -0.036 | 0.1 | 5.750  |
| ## 275 | pclass =~   | w15          | 3.450 | 0.117  | 0.047  | 0.1 | 2.539  |
| ## 201 | outsider =~ | w12          | 3.217 | 0.047  | 0.040  | 0.1 | 14.623 |
| ## 377 | w4 ~        | Edu          | 3.201 | -0.042 | -0.029 | 0.1 | 17.777 |
| ## 182 | compres =~  | w19          | 3.187 | 0.041  | 0.030  | 0.1 | 18.949 |
| ## 409 | w6 ~        | w16          | 3.094 | 0.033  | 0.023  | 0.1 | 28.233 |
| ## 390 | w5 ~        | w17          | 3.090 | 0.029  | 0.023  | 0.1 | 35.843 |
| ## 482 | w10 ~       | w19          | 3.029 | 0.038  | 0.021  | 0.1 | 20.894 |
| ## 503 | w11 ~       | Edu          | 3.011 | 0.043  | 0.031  | 0.1 | 15.996 |
| ## 264 | pclass =~   | w4           | 3.008 | -0.108 | -0.045 | 0.1 | 2.562  |
| ## 143 | change =~   | Uninsured    | 3.003 | 0.187  | 0.039  | 0.1 | 0.863  |
| ## 473 | w9 ~        | Income       | 2.993 | -0.073 | -0.031 | 0.1 | 5.641  |
| ## 491 | w11 ~       | w13          | 2.951 | -0.028 | -0.020 | 0.1 | 38.189 |
| ## 110 | persp =~    | w12          | 2.943 | -0.090 | -0.062 | 0.1 | 3.627  |
| ## 493 | w11 ~       | w15          | 2.906 | 0.028  | 0.020  | 0.1 | 36.690 |
| ## 443 | w8 ~        | w13          | 2.903 | -0.032 | -0.022 | 0.1 | 28.240 |
| ## 322 | w2 ~        | w15          | 2.853 | 0.030  | 0.021  | 0.1 | 31.171 |
| ## 309 | w1 ~        | Income       | 2.794 | -0.057 | -0.027 | 0.1 | 8.617  |
| ## 388 | w5 ~        | w15          | 2.782 | 0.027  | 0.018  | 0.1 | 39.362 |
| ## 463 | w9 ~        | w16          | 2.691 | -0.036 | -0.024 | 0.1 | 20.529 |
| ## 437 | w7 ~        | Edu          | 2.682 | -0.045 | -0.031 | 0.1 | 13.003 |
| ## 449 | w8 ~        | w19          | 2.605 | -0.030 | -0.019 | 0.1 | 29.742 |
| ## 207 | outsider =~ | WorriedMoney | 2.556 | 0.052  | 0.036  | 0.1 | 9.389  |
| ## 192 | outsider =~ | w3           | 2.556 | -0.029 | -0.026 | 0.1 | 30.744 |
| ## 158 | humility =~ | w16          | 2.543 | -0.082 | -0.059 | 0.1 | 3.784  |
| ## 567 | w17 ~       | w20          | 2.542 | -0.024 | -0.016 | 0.1 | 44.702 |
| ## 472 | w9 ~        | Edu          | 2.538 | 0.045  | 0.029  | 0.1 | 12.782 |
| ## 326 | w2 ~        | w19          | 2.485 | -0.027 | -0.017 | 0.1 | 34.287 |
| ## 404 | w6 ~        | w11          | 2.468 | -0.026 | -0.019 | 0.1 | 36.535 |
| ## 445 | w8 ~        | w15          | 2.463 | 0.030  | 0.021  | 0.1 | 27.078 |
| ## 108 | persp =~    | w10          | 2.459 | -0.094 | -0.057 | 0.1 | 2.755  |
| ## 254 | class =~    | w17          | 2.429 | 0.103  | 0.033  | 0.1 | 2.293  |
| ## 370 | w4 ~        | w18          | 2.398 | -0.025 | -0.016 | 0.1 | 37.918 |
| ## 487 | w10 ~       | OccPres      | 2.391 | 0.073  | 0.027  | 0.1 | 4.426  |
| ## 583 | w19 ~       | w21          | 2.345 | -0.029 | -0.017 | 0.1 | 27.450 |
| ## 403 | w6 ~        | w10          | 2.323 | -0.035 | -0.021 | 0.1 | 18.867 |
| ## 620 | change ~    | wow          | 2.308 | -0.317 | -0.486 | 0.1 | 0.229  |
| ## 514 | w12 ~       | WorriedMoney | 2.307 | -0.053 | -0.028 | 0.1 | 8.220  |
| ## 343 | w3 ~        | w13          | 2.296 | 0.020  | 0.014  | 0.1 | 58.136 |
| ## 422 | w7 ~        | w10          | 2.279 | -0.040 | -0.024 | 0.1 | 14.014 |
| ## 382 | w5 ~        | w9           | 2.278 | -0.028 | -0.019 | 0.1 | 28.423 |
| ## 356 | w3 ~        | Income       | 2.264 | 0.046  | 0.021  | 0.1 | 10.746 |
| ## 517 | w12 ~       | Edu          | 2.258 | -0.045 | -0.030 | 0.1 | 11.326 |
| ## 371 | w4 ~        | w19          | 2.232 | 0.022  | 0.014  | 0.1 | 45.461 |
| ## 435 | w7 ~        | Uninsured    | 2.230 | 0.130  | 0.025  | 0.1 | 1.319  |
| ## 247 | class =~    | w10          | 2.228 | -0.138 | -0.035 | 0.1 | 1.171  |
| ## 605 | Uninsured ~ | Edu          | 2.207 | -0.178 | -0.033 | 0.1 | 0.697  |
| ## 558 | w16 ~       | w20          | 2.197 | -0.025 | -0.016 | 0.1 | 34.122 |
| ## 546 | w15 ~       | w18          | 2.184 | -0.024 | -0.015 | 0.1 | 37.661 |
| ## 434 | w7 ~        | WorriedMoney | 2.154 | -0.048 | -0.026 | 0.1 | 9.433  |
| ## 447 | w8 ~        | w17          | 2.123 | 0.029  | 0.022  | 0.1 | 24.547 |

|        |             |              |       |        |        |     |        |
|--------|-------------|--------------|-------|--------|--------|-----|--------|
| ## 423 | w7 ~        | w11          | 2.112 | 0.028  | 0.020  | 0.1 | 27.366 |
| ## 564 | w16 ~       | Income       | 2.094 | 0.062  | 0.028  | 0.1 | 5.396  |
| ## 391 | w5 ~        | w18          | 2.069 | -0.024 | -0.015 | 0.1 | 36.322 |
| ## 335 | w3 ~        | w5           | 2.055 | -0.020 | -0.014 | 0.1 | 53.959 |
| ## 109 | persp ==    | w11          | 2.046 | 0.072  | 0.053  | 0.1 | 3.968  |
| ## 548 | w15 ~       | w20          | 2.034 | -0.020 | -0.013 | 0.1 | 49.344 |
| ## 569 | w17 ~       | WorriedMoney | 1.991 | 0.041  | 0.024  | 0.1 | 11.603 |
| ## 531 | w13 ~       | Income       | 1.941 | -0.049 | -0.022 | 0.1 | 8.126  |
| ## 556 | w16 ~       | w18          | 1.904 | 0.027  | 0.017  | 0.1 | 26.029 |
| ## 350 | w3 ~        | w20          | 1.896 | -0.017 | -0.011 | 0.1 | 68.164 |
| ## 353 | w3 ~        | Uninsured    | 1.888 | -0.087 | -0.017 | 0.1 | 2.478  |
| ## 427 | w7 ~        | w15          | 1.885 | -0.025 | -0.017 | 0.1 | 30.241 |
| ## 348 | w3 ~        | w18          | 1.881 | 0.019  | 0.012  | 0.1 | 52.063 |
| ## 606 | Uninsured ~ | Income       | 1.877 | 0.261  | 0.032  | 0.1 | 0.275  |
| ## 506 | w12 ~       | w14          | 1.863 | 0.025  | 0.017  | 0.1 | 29.413 |
| ## 529 | w13 ~       | OccPres      | 1.855 | 0.043  | 0.019  | 0.1 | 9.956  |
| ## 354 | w3 ~        | OccPres      | 1.850 | -0.037 | -0.017 | 0.1 | 13.163 |
| ## 252 | class ==    | w15          | 1.848 | -0.086 | -0.025 | 0.1 | 2.524  |
| ## 368 | w4 ~        | w16          | 1.831 | 0.025  | 0.018  | 0.1 | 28.599 |
| ## 288 | w1 ~        | w5           | 1.779 | -0.020 | -0.015 | 0.1 | 43.603 |
| ## 294 | w1 ~        | w11          | 1.767 | 0.021  | 0.016  | 0.1 | 40.735 |
| ## 585 | w19 ~       | Uninsured    | 1.747 | -0.094 | -0.017 | 0.1 | 1.965  |
| ## 591 | w20 ~       | Uninsured    | 1.740 | 0.090  | 0.016  | 0.1 | 2.148  |
| ## 532 | w14 ~       | w15          | 1.739 | 0.024  | 0.016  | 0.1 | 31.096 |
| ## 308 | w1 ~        | Edu          | 1.707 | 0.030  | 0.021  | 0.1 | 19.504 |
| ## 486 | w10 ~       | Uninsured    | 1.695 | 0.143  | 0.023  | 0.1 | 0.829  |
| ## 586 | w19 ~       | OccPres      | 1.665 | -0.040 | -0.016 | 0.1 | 10.498 |
| ## 112 | persp ==    | w14          | 1.660 | -0.053 | -0.036 | 0.1 | 5.996  |
| ## 566 | w17 ~       | w19          | 1.640 | 0.020  | 0.014  | 0.1 | 40.889 |
| ## 539 | w14 ~       | WorriedMoney | 1.636 | 0.034  | 0.018  | 0.1 | 14.436 |
| ## 393 | w5 ~        | w20          | 1.612 | -0.018 | -0.012 | 0.1 | 47.597 |
| ## 399 | w5 ~        | Income       | 1.605 | 0.046  | 0.021  | 0.1 | 7.522  |
| ## 148 | humility == | w2           | 1.601 | 0.059  | 0.042  | 0.1 | 4.621  |
| ## 351 | w3 ~        | w21          | 1.601 | -0.017 | -0.011 | 0.1 | 54.175 |
| ## 525 | w13 ~       | w20          | 1.579 | -0.018 | -0.011 | 0.1 | 51.467 |
| ## 470 | w9 ~        | Uninsured    | 1.567 | 0.110  | 0.020  | 0.1 | 1.298  |
| ## 508 | w12 ~       | w16          | 1.550 | -0.029 | -0.020 | 0.1 | 18.222 |
| ## 432 | w7 ~        | w20          | 1.539 | 0.021  | 0.013  | 0.1 | 36.351 |
| ## 339 | w3 ~        | w9           | 1.534 | 0.020  | 0.013  | 0.1 | 40.109 |
| ## 289 | w1 ~        | w6           | 1.527 | -0.018 | -0.014 | 0.1 | 44.941 |
| ## 492 | w11 ~       | w14          | 1.479 | -0.019 | -0.013 | 0.1 | 40.918 |
| ## 538 | w14 ~       | w21          | 1.475 | -0.018 | -0.011 | 0.1 | 44.123 |
| ## 607 | OccPres ~   | Edu          | 1.457 | -0.099 | -0.042 | 0.1 | 1.495  |
| ## 553 | w15 ~       | Edu          | 1.450 | 0.029  | 0.019  | 0.1 | 17.650 |
| ## 469 | w9 ~        | WorriedMoney | 1.440 | -0.039 | -0.020 | 0.1 | 9.284  |
| ## 144 | change ==   | OccPres      | 1.388 | 0.073  | 0.035  | 0.1 | 2.571  |
| ## 250 | class ==    | w13          | 1.378 | -0.072 | -0.021 | 0.1 | 2.631  |
| ## 407 | w6 ~        | w14          | 1.342 | -0.017 | -0.012 | 0.1 | 45.416 |
| ## 145 | change ==   | Edu          | 1.341 | -0.043 | -0.032 | 0.1 | 7.371  |
| ## 627 | humility ~  | pclass       | 1.324 | 0.016  | 0.038  | 0.1 | 49.646 |
| ## 547 | w15 ~       | w19          | 1.314 | 0.017  | 0.011  | 0.1 | 45.149 |
| ## 273 | pclass ==   | w13          | 1.302 | -0.070 | -0.029 | 0.1 | 2.647  |
| ## 185 | comprres == | WorriedMoney | 1.287 | 0.042  | 0.026  | 0.1 | 7.203  |
| ## 440 | w8 ~        | w10          | 1.276 | -0.032 | -0.019 | 0.1 | 12.542 |

|        |             |              |       |        |        |     |        |
|--------|-------------|--------------|-------|--------|--------|-----|--------|
| ## 523 | w13 ~       | w18          | 1.251 | -0.018 | -0.011 | 0.1 | 39.286 |
| ## 132 | change =~   | w12          | 1.245 | 0.048  | 0.036  | 0.1 | 5.420  |
| ## 518 | w12 ~       | Income       | 1.219 | 0.049  | 0.022  | 0.1 | 5.005  |
| ## 323 | w2 ~        | w16          | 1.218 | 0.024  | 0.016  | 0.1 | 21.594 |
| ## 167 | humility =~ | Edu          | 1.215 | 0.044  | 0.032  | 0.1 | 6.136  |
| ## 238 | class =~    | w1           | 1.200 | -0.066 | -0.021 | 0.1 | 2.794  |
| ## 537 | w14 ~       | w20          | 1.183 | 0.015  | 0.009  | 0.1 | 55.531 |
| ## 466 | w9 ~        | w19          | 1.182 | 0.019  | 0.012  | 0.1 | 32.694 |
| ## 476 | w10 ~       | w13          | 1.168 | -0.024 | -0.014 | 0.1 | 19.764 |
| ## 516 | w12 ~       | OccPres      | 1.126 | -0.043 | -0.018 | 0.1 | 6.133  |
| ## 396 | w5 ~        | Uninsured    | 1.111 | 0.080  | 0.015  | 0.1 | 1.729  |
| ## 349 | w3 ~        | w19          | 1.111 | 0.013  | 0.009  | 0.1 | 62.398 |
| ## 446 | w8 ~        | w16          | 1.105 | 0.024  | 0.017  | 0.1 | 18.739 |
| ## 116 | persp =~    | w18          | 1.102 | 0.029  | 0.018  | 0.1 | 13.207 |
| ## 595 | w21 ~       | WorriedMoney | 1.097 | 0.030  | 0.015  | 0.1 | 12.188 |
| ## 571 | w17 ~       | OccPres      | 1.079 | -0.035 | -0.017 | 0.1 | 8.661  |
| ## 494 | w11 ~       | w16          | 1.062 | 0.020  | 0.015  | 0.1 | 25.674 |
| ## 421 | w7 ~        | w9           | 1.051 | -0.022 | -0.015 | 0.1 | 21.881 |
| ## 608 | OccPres ~   | Income       | 1.037 | 0.137  | 0.039  | 0.1 | 0.550  |
| ## 372 | w4 ~        | w20          | 1.036 | -0.014 | -0.009 | 0.1 | 49.691 |
| ## 179 | comprses =~ | w11          | 1.030 | 0.051  | 0.041  | 0.1 | 4.031  |
| ## 464 | w9 ~        | w17          | 1.020 | -0.019 | -0.014 | 0.1 | 26.860 |
| ## 413 | w6 ~        | w20          | 1.008 | 0.014  | 0.009  | 0.1 | 49.086 |
| ## 268 | pclass =~   | w8           | 1.000 | -0.077 | -0.032 | 0.1 | 1.682  |
| ## 115 | persp =~    | w17          | 0.970 | -0.041 | -0.032 | 0.1 | 5.792  |
| ## 592 | w20 ~       | OccPres      | 0.956 | 0.029  | 0.011  | 0.1 | 11.478 |
| ## 460 | w9 ~        | w13          | 0.954 | -0.018 | -0.012 | 0.1 | 30.620 |
| ## 550 | w15 ~       | WorriedMoney | 0.953 | -0.027 | -0.015 | 0.1 | 12.818 |
| ## 542 | w14 ~       | Edu          | 0.920 | -0.022 | -0.014 | 0.1 | 19.865 |
| ## 545 | w15 ~       | w17          | 0.919 | -0.017 | -0.013 | 0.1 | 33.216 |
| ## 598 | w21 ~       | Edu          | 0.916 | -0.023 | -0.015 | 0.1 | 16.804 |
| ## 479 | w10 ~       | w16          | 0.916 | -0.026 | -0.016 | 0.1 | 13.152 |
| ## 146 | change =~   | Income       | 0.907 | -0.064 | -0.032 | 0.1 | 2.208  |
| ## 227 | wow =~      | w16          | 0.882 | -0.097 | -0.056 | 0.1 | 0.943  |
| ## 355 | w3 ~        | Edu          | 0.865 | 0.019  | 0.013  | 0.1 | 24.386 |
| ## 307 | w1 ~        | OccPres      | 0.858 | 0.029  | 0.013  | 0.1 | 10.559 |
| ## 291 | w1 ~        | w8           | 0.835 | -0.017 | -0.012 | 0.1 | 29.929 |
| ## 527 | w13 ~       | WorriedMoney | 0.835 | 0.025  | 0.013  | 0.1 | 13.372 |
| ## 337 | w3 ~        | w7           | 0.819 | -0.014 | -0.010 | 0.1 | 41.697 |
| ## 554 | w15 ~       | Income       | 0.808 | 0.032  | 0.014  | 0.1 | 7.792  |
| ## 509 | w12 ~       | w17          | 0.805 | -0.018 | -0.014 | 0.1 | 23.857 |
| ## 220 | wow =~      | w9           | 0.777 | 0.109  | 0.061  | 0.1 | 0.654  |
| ## 619 | change ~    | outsider     | 0.760 | 0.016  | 0.016  | 0.1 | 29.443 |
| ## 398 | w5 ~        | Edu          | 0.720 | -0.021 | -0.014 | 0.1 | 17.028 |
| ## 478 | w10 ~       | w15          | 0.693 | 0.019  | 0.011  | 0.1 | 18.959 |
| ## 577 | w18 ~       | WorriedMoney | 0.692 | -0.024 | -0.012 | 0.1 | 11.713 |
| ## 375 | w4 ~        | Uninsured    | 0.686 | 0.062  | 0.012  | 0.1 | 1.805  |
| ## 510 | w12 ~       | w18          | 0.678 | -0.017 | -0.010 | 0.1 | 24.158 |
| ## 495 | w11 ~       | w17          | 0.668 | 0.014  | 0.011  | 0.1 | 33.580 |
| ## 572 | w17 ~       | Edu          | 0.665 | 0.020  | 0.015  | 0.1 | 15.990 |
| ## 389 | w5 ~        | w16          | 0.663 | 0.016  | 0.011  | 0.1 | 27.382 |
| ## 180 | comprses =~ | w12          | 0.662 | 0.041  | 0.032  | 0.1 | 3.872  |
| ## 269 | pclass =~   | w9           | 0.649 | -0.059 | -0.023 | 0.1 | 1.836  |
| ## 313 | w2 ~        | w6           | 0.648 | 0.014  | 0.010  | 0.1 | 31.007 |

|        |             |              |       |        |        |     |         |
|--------|-------------|--------------|-------|--------|--------|-----|---------|
| ## 187 | comprres == | OccPres      | 0.636 | 0.053  | 0.026  | 0.1 | 2.248   |
| ## 629 | comprres == | wow          | 0.636 | 0.150  | 0.224  | 0.1 | 0.282   |
| ## 276 | pclass ==   | w16          | 0.634 | 0.060  | 0.024  | 0.1 | 1.761   |
| ## 633 | outsider == | class        | 0.632 | 0.008  | 0.020  | 0.1 | 110.805 |
| ## 300 | w1 ==       | w17          | 0.631 | -0.012 | -0.010 | 0.1 | 41.086  |
| ## 246 | class ==    | w9           | 0.626 | 0.059  | 0.017  | 0.1 | 1.826   |
| ## 419 | w6 ==       | Income       | 0.615 | -0.028 | -0.013 | 0.1 | 7.756   |
| ## 632 | outsider == | wow          | 0.601 | -0.200 | -0.266 | 0.1 | 0.150   |
| ## 397 | w5 ==       | OccPres      | 0.597 | 0.025  | 0.011  | 0.1 | 9.216   |
| ## 384 | w5 ==       | w11          | 0.593 | -0.013 | -0.009 | 0.1 | 35.477  |
| ## 452 | w8 ==       | WorriedMoney | 0.586 | 0.026  | 0.014  | 0.1 | 8.438   |
| ## 235 | wow ==      | OccPres      | 0.580 | 0.077  | 0.028  | 0.1 | 0.972   |
| ## 394 | w5 ==       | w21          | 0.572 | -0.012 | -0.008 | 0.1 | 37.795  |
| ## 256 | class ==    | w19          | 0.555 | 0.045  | 0.012  | 0.1 | 2.789   |
| ## 293 | w1 ==       | w10          | 0.549 | 0.016  | 0.010  | 0.1 | 20.977  |
| ## 483 | w10 ==      | w20          | 0.549 | 0.016  | 0.008  | 0.1 | 22.842  |
| ## 562 | w16 ==      | OccPres      | 0.548 | -0.029 | -0.012 | 0.1 | 6.613   |
| ## 327 | w2 ==       | w20          | 0.542 | -0.012 | -0.007 | 0.1 | 37.485  |
| ## 415 | w6 ==       | WorriedMoney | 0.538 | 0.021  | 0.011  | 0.1 | 12.749  |
| ## 266 | pclass ==   | w6           | 0.527 | -0.046 | -0.019 | 0.1 | 2.529   |
| ## 120 | persp ==    | WorriedMoney | 0.507 | 0.030  | 0.016  | 0.1 | 5.773   |
| ## 500 | w11 ==      | WorriedMoney | 0.500 | 0.021  | 0.012  | 0.1 | 11.624  |
| ## 526 | w13 ==      | w21          | 0.490 | -0.011 | -0.007 | 0.1 | 40.880  |
| ## 504 | w11 ==      | Income       | 0.484 | -0.026 | -0.012 | 0.1 | 7.054   |
| ## 530 | w13 ==      | Edu          | 0.438 | -0.015 | -0.010 | 0.1 | 18.411  |
| ## 340 | w3 ==       | w10          | 0.429 | 0.013  | 0.008  | 0.1 | 26.081  |
| ## 330 | w2 ==       | Uninsured    | 0.427 | 0.056  | 0.011  | 0.1 | 1.361   |
| ## 304 | w1 ==       | w21          | 0.425 | -0.010 | -0.007 | 0.1 | 43.290  |
| ## 328 | w2 ==       | w21          | 0.421 | -0.012 | -0.007 | 0.1 | 29.754  |
| ## 204 | outsider == | w15          | 0.420 | 0.014  | 0.012  | 0.1 | 22.835  |
| ## 138 | change ==   | w18          | 0.420 | 0.017  | 0.011  | 0.1 | 15.411  |
| ## 477 | w10 ==      | w14          | 0.414 | -0.014 | -0.008 | 0.1 | 21.285  |
| ## 224 | wow ==      | w13          | 0.413 | 0.060  | 0.035  | 0.1 | 1.159   |
| ## 123 | persp ==    | Edu          | 0.412 | 0.025  | 0.018  | 0.1 | 6.339   |
| ## 248 | class ==    | w11          | 0.408 | 0.042  | 0.013  | 0.1 | 2.281   |
| ## 165 | humility == | Uninsured    | 0.405 | 0.074  | 0.015  | 0.1 | 0.745   |
| ## 484 | w10 ==      | w21          | 0.400 | 0.015  | 0.008  | 0.1 | 18.133  |
| ## 376 | w4 ==       | OccPres      | 0.397 | 0.020  | 0.009  | 0.1 | 9.623   |
| ## 367 | w4 ==       | w15          | 0.393 | 0.010  | 0.007  | 0.1 | 41.160  |
| ## 147 | humility == | w1           | 0.393 | 0.025  | 0.020  | 0.1 | 6.175   |
| ## 551 | w15 ==      | Uninsured    | 0.385 | -0.046 | -0.009 | 0.1 | 1.792   |
| ## 233 | wow ==      | WorriedMoney | 0.383 | 0.032  | 0.014  | 0.1 | 3.833   |
| ## 573 | w17 ==      | Income       | 0.381 | 0.023  | 0.011  | 0.1 | 7.068   |
| ## 374 | w4 ==       | WorriedMoney | 0.381 | 0.017  | 0.009  | 0.1 | 12.903  |
| ## 416 | w6 ==       | Uninsured    | 0.379 | 0.046  | 0.009  | 0.1 | 1.783   |
| ## 630 | comprres == | class        | 0.367 | -0.004 | -0.012 | 0.1 | 208.854 |
| ## 579 | w18 ==      | OccPres      | 0.359 | -0.020 | -0.008 | 0.1 | 8.755   |
| ## 319 | w2 ==       | w12          | 0.357 | 0.013  | 0.009  | 0.1 | 20.014  |
| ## 281 | pclass ==   | w21          | 0.357 | -0.038 | -0.014 | 0.1 | 2.443   |
| ## 242 | class ==    | w5           | 0.353 | -0.038 | -0.011 | 0.1 | 2.438   |
| ## 253 | class ==    | w16          | 0.352 | 0.045  | 0.013  | 0.1 | 1.751   |
| ## 587 | w19 ==      | Edu          | 0.347 | 0.013  | 0.008  | 0.1 | 19.365  |
| ## 205 | outsider == | w16          | 0.335 | -0.014 | -0.013 | 0.1 | 16.189  |
| ## 317 | w2 ==       | w10          | 0.333 | -0.015 | -0.009 | 0.1 | 14.447  |

|        |             |              |       |        |        |     |        |
|--------|-------------|--------------|-------|--------|--------|-----|--------|
| ## 405 | w6 ~        | w12          | 0.332 | 0.011  | 0.008  | 0.1 | 26.105 |
| ## 274 | pclass =~   | w14          | 0.330 | -0.034 | -0.014 | 0.1 | 2.850  |
| ## 314 | w2 ~        | w7           | 0.328 | -0.012 | -0.008 | 0.1 | 23.005 |
| ## 560 | w16 ~       | WorriedMoney | 0.322 | -0.019 | -0.010 | 0.1 | 8.855  |
| ## 616 | persp ~     | pclass       | 0.319 | 0.007  | 0.017  | 0.1 | 66.342 |
| ## 239 | class =~    | w2           | 0.316 | 0.041  | 0.012  | 0.1 | 1.924  |
| ## 528 | w13 ~       | Uninsured    | 0.313 | -0.041 | -0.008 | 0.1 | 1.870  |
| ## 559 | w16 ~       | w21          | 0.282 | 0.010  | 0.006  | 0.1 | 27.084 |
| ## 359 | w4 ~        | w7           | 0.279 | -0.010 | -0.007 | 0.1 | 30.471 |
| ## 540 | w14 ~       | Uninsured    | 0.278 | -0.037 | -0.007 | 0.1 | 2.018  |
| ## 363 | w4 ~        | w11          | 0.273 | -0.009 | -0.006 | 0.1 | 37.104 |
| ## 584 | w19 ~       | WorriedMoney | 0.271 | 0.014  | 0.007  | 0.1 | 14.046 |
| ## 278 | pclass =~   | w18          | 0.267 | -0.034 | -0.012 | 0.1 | 2.347  |
| ## 234 | wow =~      | Uninsured    | 0.264 | 0.073  | 0.012  | 0.1 | 0.501  |
| ## 511 | w12 ~       | w19          | 0.263 | -0.010 | -0.006 | 0.1 | 28.964 |
| ## 296 | w1 ~        | w13          | 0.263 | 0.007  | 0.005  | 0.1 | 47.082 |
| ## 244 | class =~    | w7           | 0.252 | 0.037  | 0.011  | 0.1 | 1.867  |
| ## 455 | w8 ~        | Edu          | 0.248 | -0.015 | -0.010 | 0.1 | 11.632 |
| ## 604 | Uninsured ~ | OccPres      | 0.243 | -0.854 | -0.102 | 0.1 | 0.003  |
| ## 324 | w2 ~        | w17          | 0.241 | -0.009 | -0.007 | 0.1 | 28.282 |
| ## 249 | class =~    | w12          | 0.236 | -0.038 | -0.011 | 0.1 | 1.622  |
| ## 265 | pclass =~   | w5           | 0.231 | 0.031  | 0.013  | 0.1 | 2.454  |
| ## 303 | w1 ~        | w20          | 0.231 | 0.007  | 0.004  | 0.1 | 54.521 |
| ## 552 | w15 ~       | OccPres      | 0.225 | 0.015  | 0.007  | 0.1 | 9.548  |
| ## 243 | class =~    | w6           | 0.219 | 0.029  | 0.009  | 0.1 | 2.514  |
| ## 364 | w4 ~        | w12          | 0.218 | -0.009 | -0.006 | 0.1 | 26.460 |
| ## 597 | w21 ~       | OccPres      | 0.217 | 0.015  | 0.006  | 0.1 | 9.110  |
| ## 257 | class =~    | w20          | 0.211 | -0.026 | -0.007 | 0.1 | 3.049  |
| ## 625 | humility ~  | wow          | 0.210 | 0.091  | 0.147  | 0.1 | 0.255  |
| ## 588 | w19 ~       | Income       | 0.200 | 0.015  | 0.006  | 0.1 | 8.566  |
| ## 441 | w8 ~        | w11          | 0.198 | 0.009  | 0.006  | 0.1 | 24.520 |
| ## 241 | class =~    | w4           | 0.198 | 0.028  | 0.008  | 0.1 | 2.546  |
| ## 590 | w20 ~       | WorriedMoney | 0.197 | 0.011  | 0.006  | 0.1 | 15.359 |
| ## 456 | w8 ~        | Income       | 0.195 | -0.019 | -0.009 | 0.1 | 5.144  |
| ## 631 | compres ~   | pclass       | 0.193 | 0.006  | 0.013  | 0.1 | 55.074 |
| ## 155 | humility =~ | w13          | 0.184 | -0.019 | -0.014 | 0.1 | 5.013  |
| ## 142 | change =~   | WorriedMoney | 0.181 | -0.017 | -0.010 | 0.1 | 6.469  |
| ## 378 | w4 ~        | Income       | 0.175 | -0.015 | -0.007 | 0.1 | 7.854  |
| ## 502 | w11 ~       | OccPres      | 0.175 | -0.014 | -0.006 | 0.1 | 8.642  |
| ## 338 | w3 ~        | w8           | 0.165 | 0.007  | 0.005  | 0.1 | 37.370 |
| ## 442 | w8 ~        | w12          | 0.165 | 0.010  | 0.007  | 0.1 | 17.381 |
| ## 229 | wow =~      | w18          | 0.161 | 0.014  | 0.008  | 0.1 | 7.686  |
| ## 448 | w8 ~        | w18          | 0.155 | 0.008  | 0.005  | 0.1 | 24.803 |
| ## 255 | class =~    | w18          | 0.151 | 0.025  | 0.007  | 0.1 | 2.326  |
| ## 406 | w6 ~        | w13          | 0.150 | 0.006  | 0.004  | 0.1 | 42.257 |
| ## 424 | w7 ~        | w12          | 0.150 | 0.009  | 0.006  | 0.1 | 19.417 |
| ## 557 | w16 ~       | w19          | 0.146 | -0.007 | -0.004 | 0.1 | 31.210 |
| ## 344 | w3 ~        | w14          | 0.145 | -0.005 | -0.003 | 0.1 | 62.259 |
| ## 122 | persp =~    | OccPres      | 0.141 | 0.027  | 0.012  | 0.1 | 1.944  |
| ## 563 | w16 ~       | Edu          | 0.135 | -0.010 | -0.007 | 0.1 | 12.205 |
| ## 191 | outsider =~ | w2           | 0.134 | -0.009 | -0.008 | 0.1 | 18.034 |
| ## 277 | pclass =~   | w17          | 0.128 | 0.024  | 0.011  | 0.1 | 2.306  |
| ## 345 | w3 ~        | w15          | 0.127 | -0.005 | -0.003 | 0.1 | 55.863 |
| ## 358 | w4 ~        | w6           | 0.126 | -0.006 | -0.004 | 0.1 | 40.947 |



|        |                 |              |       |        |        |     |         |
|--------|-----------------|--------------|-------|--------|--------|-----|---------|
| ## 166 | humility =~     | OccPres      | 0.125 | 0.026  | 0.012  | 0.1 | 1.815   |
| ## 485 | w10 =~          | WorriedMoney | 0.122 | -0.014 | -0.007 | 0.1 | 5.929   |
| ## 332 | w2 =~           | Edu          | 0.121 | 0.010  | 0.006  | 0.1 | 13.408  |
| ## 614 | persp =~        | wow          | 0.119 | 0.059  | 0.099  | 0.1 | 0.340   |
| ## 282 | pclass =~       | WorriedMoney | 0.116 | -0.043 | -0.014 | 0.1 | 0.624   |
| ## 561 | w16 =~          | Uninsured    | 0.116 | 0.031  | 0.006  | 0.1 | 1.239   |
| ## 280 | pclass =~       | w20          | 0.115 | 0.019  | 0.007  | 0.1 | 3.076   |
| ## 306 | w1 =~           | Uninsured    | 0.114 | -0.024 | -0.005 | 0.1 | 1.980   |
| ## 570 | w17 =~          | Uninsured    | 0.114 | 0.027  | 0.006  | 0.1 | 1.623   |
| ## 599 | w21 =~          | Income       | 0.114 | 0.012  | 0.005  | 0.1 | 7.434   |
| ## 168 | humility =~     | Income       | 0.112 | -0.026 | -0.013 | 0.1 | 1.598   |
| ## 594 | w20 =~          | Income       | 0.109 | -0.011 | -0.004 | 0.1 | 9.366   |
| ## 236 | wow =~          | Edu          | 0.109 | 0.017  | 0.010  | 0.1 | 3.982   |
| ## 237 | wow =~          | Income       | 0.109 | -0.035 | -0.013 | 0.1 | 0.884   |
| ## 259 | class =~        | Edu          | 0.109 | -0.177 | -0.052 | 0.1 | 0.035   |
| ## 245 | class =~        | w8           | 0.109 | 0.026  | 0.008  | 0.1 | 1.671   |
| ## 260 | class =~        | Income       | 0.109 | 0.375  | 0.073  | 0.1 | 0.008   |
| ## 129 | change =~       | w9           | 0.108 | 0.014  | 0.010  | 0.1 | 5.463   |
| ## 295 | w1 =~           | w12          | 0.102 | 0.006  | 0.004  | 0.1 | 29.038  |
| ## 626 | humility =~     | class        | 0.101 | 0.002  | 0.007  | 0.1 | 188.314 |
| ## 223 | wow =~          | w12          | 0.099 | 0.035  | 0.020  | 0.1 | 0.824   |
| ## 488 | w10 =~          | Edu          | 0.096 | 0.011  | 0.006  | 0.1 | 8.155   |
| ## 613 | persp =~        | outsider     | 0.095 | -0.005 | -0.005 | 0.1 | 41.714  |
| ## 194 | outsider =~     | w5           | 0.092 | 0.006  | 0.006  | 0.1 | 22.454  |
| ## 210 | outsider =~     | Edu          | 0.084 | -0.008 | -0.007 | 0.1 | 12.011  |
| ## 139 | change =~       | w19          | 0.082 | 0.007  | 0.005  | 0.1 | 18.188  |
| ## 279 | pclass =~       | w19          | 0.076 | 0.016  | 0.006  | 0.1 | 2.814   |
| ## 251 | class =~        | w14          | 0.074 | 0.016  | 0.005  | 0.1 | 2.833   |
| ## 498 | w11 =~          | w20          | 0.074 | -0.004 | -0.003 | 0.1 | 44.711  |
| ## 603 | WorriedMoney =~ | Income       | 0.073 | -0.018 | -0.006 | 0.1 | 2.345   |
| ## 159 | humility =~     | w17          | 0.072 | 0.012  | 0.010  | 0.1 | 4.887   |
| ## 581 | w18 =~          | Income       | 0.070 | -0.010 | -0.004 | 0.1 | 7.144   |
| ## 471 | w9 =~           | OccPres      | 0.068 | -0.010 | -0.004 | 0.1 | 6.911   |
| ## 181 | compres =~      | w18          | 0.061 | -0.006 | -0.004 | 0.1 | 16.137  |
| ## 568 | w17 =~          | w21          | 0.060 | -0.004 | -0.003 | 0.1 | 35.485  |
| ## 453 | w8 =~           | Uninsured    | 0.059 | -0.022 | -0.004 | 0.1 | 1.180   |
| ## 600 | WorriedMoney =~ | Uninsured    | 0.059 | -0.054 | -0.008 | 0.1 | 0.202   |
| ## 450 | w8 =~           | w20          | 0.053 | 0.004  | 0.003  | 0.1 | 32.519  |
| ## 341 | w3 =~           | w11          | 0.051 | -0.003 | -0.002 | 0.1 | 49.889  |
| ## 133 | change =~       | w13          | 0.051 | -0.008 | -0.006 | 0.1 | 8.795   |
| ## 580 | w18 =~          | Edu          | 0.050 | -0.006 | -0.003 | 0.1 | 16.149  |
| ## 160 | humility =~     | w18          | 0.048 | 0.006  | 0.004  | 0.1 | 12.586  |
| ## 124 | persp =~        | Income       | 0.048 | -0.017 | -0.008 | 0.1 | 1.702   |
| ## 436 | w7 =~           | OccPres      | 0.044 | 0.008  | 0.003  | 0.1 | 7.046   |
| ## 418 | w6 =~           | Edu          | 0.043 | -0.005 | -0.003 | 0.1 | 17.560  |
| ## 362 | w4 =~           | w10          | 0.041 | -0.005 | -0.003 | 0.1 | 19.116  |
| ## 283 | pclass =~       | Uninsured    | 0.041 | 0.080  | 0.009  | 0.1 | 0.064   |
| ## 272 | pclass =~       | w12          | 0.041 | 0.016  | 0.006  | 0.1 | 1.632   |
| ## 541 | w14 =~          | OccPres      | 0.040 | -0.006 | -0.003 | 0.1 | 10.731  |
| ## 188 | compres =~      | Edu          | 0.038 | 0.007  | 0.005  | 0.1 | 7.787   |
| ## 383 | w5 =~           | w10          | 0.037 | -0.004 | -0.003 | 0.1 | 18.302  |
| ## 131 | change =~       | w11          | 0.034 | -0.007 | -0.006 | 0.1 | 6.548   |
| ## 301 | w1 =~           | w18          | 0.034 | 0.003  | 0.002  | 0.1 | 41.602  |
| ## 333 | w2 =~           | Income       | 0.032 | 0.007  | 0.003  | 0.1 | 5.928   |

|        |                |              |       |        |        |     |         |
|--------|----------------|--------------|-------|--------|--------|-----|---------|
| ## 360 | w4 ~           | w8           | 0.030 | -0.003 | -0.002 | 0.1 | 27.277  |
| ## 578 | w18 ~          | Uninsured    | 0.030 | -0.014 | -0.002 | 0.1 | 1.638   |
| ## 271 | pclass ~       | w11          | 0.028 | 0.011  | 0.005  | 0.1 | 2.294   |
| ## 499 | w11 ~          | w21          | 0.027 | 0.003  | 0.002  | 0.1 | 35.526  |
| ## 512 | w12 ~          | w20          | 0.024 | 0.003  | 0.002  | 0.1 | 31.660  |
| ## 209 | outsider ~     | OccPres      | 0.023 | -0.006 | -0.004 | 0.1 | 5.649   |
| ## 634 | outsider ~     | pclass       | 0.022 | -0.003 | -0.005 | 0.1 | 29.211  |
| ## 385 | w5 ~           | w12          | 0.021 | 0.003  | 0.002  | 0.1 | 25.328  |
| ## 261 | pclass ~       | w1           | 0.018 | -0.008 | -0.003 | 0.1 | 2.811   |
| ## 305 | w1 ~           | WorriedMoney | 0.017 | 0.004  | 0.002  | 0.1 | 14.157  |
| ## 121 | persp ~        | Uninsured    | 0.015 | 0.014  | 0.003  | 0.1 | 0.764   |
| ## 208 | outsider ~     | Uninsured    | 0.015 | 0.011  | 0.003  | 0.1 | 1.288   |
| ## 596 | w21 ~          | Uninsured    | 0.012 | -0.008 | -0.001 | 0.1 | 1.705   |
| ## 331 | w2 ~           | OccPres      | 0.011 | -0.004 | -0.002 | 0.1 | 7.265   |
| ## 352 | w3 ~           | WorriedMoney | 0.010 | -0.002 | -0.001 | 0.1 | 17.728  |
| ## 318 | w2 ~           | w11          | 0.009 | 0.002  | 0.001  | 0.1 | 28.188  |
| ## 196 | outsider ~     | w7           | 0.009 | -0.002 | -0.002 | 0.1 | 18.000  |
| ## 240 | class ~        | w3           | 0.007 | 0.005  | 0.001  | 0.1 | 3.473   |
| ## 454 | w8 ~           | OccPres      | 0.007 | 0.003  | 0.001  | 0.1 | 6.304   |
| ## 501 | w11 ~          | Uninsured    | 0.005 | 0.006  | 0.001  | 0.1 | 1.625   |
| ## 199 | outsider ~     | w10          | 0.005 | 0.002  | 0.002  | 0.1 | 10.651  |
| ## 411 | w6 ~           | w18          | 0.005 | -0.001 | -0.001 | 0.1 | 37.461  |
| ## 593 | w20 ~          | Edu          | 0.005 | 0.002  | 0.001  | 0.1 | 21.175  |
| ## 258 | class ~        | w21          | 0.005 | 0.004  | 0.001  | 0.1 | 2.421   |
| ## 211 | outsider ~     | Income       | 0.005 | 0.003  | 0.002  | 0.1 | 4.676   |
| ## 189 | compres ~      | Income       | 0.004 | 0.005  | 0.002  | 0.1 | 1.987   |
| ## 373 | w4 ~           | w21          | 0.004 | 0.001  | 0.001  | 0.1 | 39.456  |
| ## 621 | change ~       | class        | 0.004 | 0.000  | -0.001 | 0.1 | 169.707 |
| ## 602 | WorriedMoney ~ | Edu          | 0.004 | -0.003 | -0.001 | 0.1 | 5.396   |
| ## 417 | w6 ~           | OccPres      | 0.003 | 0.002  | 0.001  | 0.1 | 9.503   |
| ## 465 | w9 ~           | w18          | 0.003 | -0.001 | -0.001 | 0.1 | 27.273  |
| ## 543 | w14 ~          | Income       | 0.002 | -0.001 | -0.001 | 0.1 | 8.760   |
| ## 369 | w4 ~           | w17          | 0.001 | 0.001  | 0.000  | 0.1 | 37.442  |
| ## 601 | WorriedMoney ~ | OccPres      | 0.001 | 0.006  | 0.002  | 0.1 | 0.308   |
| ## 329 | w2 ~           | WorriedMoney | 0.001 | -0.001 | 0.000  | 0.1 | 9.728   |
| ## 186 | compres ~      | Uninsured    | 0.000 | 0.002  | 0.000  | 0.1 | 0.950   |
| ## 433 | w7 ~           | w21          | 0.000 | 0.000  | 0.000  | 0.1 | 28.853  |
| ## 615 | persp ~        | class        | 0.000 | 0.000  | 0.000  | 0.1 | 251.599 |
| ## 298 | w1 ~           | w15          | 0.000 | 0.000  | 0.000  | 0.1 | 45.175  |
| ## 193 | outsider ~     | w4           | 0.000 | 0.000  | 0.000  | 0.1 | 23.435  |
| ## 524 | w13 ~          | w19          | 0.000 | 0.000  | 0.000  | 0.1 | 47.096  |
| ## 262 | pclass ~       | w2           | 0.000 | -0.001 | 0.000  | 0.1 | 1.936   |
| ## 284 | pclass ~       | OccPres      | 0.000 | 0.003  | 0.001  | 0.1 | 0.116   |
| ## 365 | w4 ~           | w13          | 0.000 | 0.000  | 0.000  | 0.1 | 42.895  |
| ## 408 | w6 ~           | w15          | 0.000 | 0.000  | 0.000  | 0.1 | 40.560  |
| ## 414 | w6 ~           | w21          | 0.000 | 0.000  | 0.000  | 0.1 | 38.980  |
| ## 164 | humility ~     | WorriedMoney | 0.000 | 0.000  | 0.000  | 0.1 | 5.644   |
| ##     | power decision |              |       |        |        |     |         |
| ## 555 | 0.999          | *epc:m*      |       |        |        |     |         |
| ## 420 | 0.990          | *epc:m*      |       |        |        |     |         |
| ## 380 | 0.995          | epc:nm       |       |        |        |     |         |
| ## 519 | 1.000          | *epc:m*      |       |        |        |     |         |
| ## 401 | 0.995          | epc:nm       |       |        |        |     |         |
| ## 286 | 1.000          | *epc:m*      |       |        |        |     |         |

## 379 0.969 \*epc:m\*  
## 173 0.755 \*epc:m\*  
## 457 0.926 \*epc:m\*  
## 439 0.993 \*epc:m\*  
## 522 1.000 epc:nm  
## 216 0.303 \*(m)\*\*  
## 624 1.000 \*epc:m\*  
## 154 0.615 \*(m)\*\*  
## 628 1.000 epc:nm  
## 381 0.994 epc:nm  
## 105 0.697 \*(m)\*\*  
## 170 0.685 \*(m)\*\*  
## 218 0.329 \*(m)\*\*  
## 137 0.820 \*epc:m\*  
## 152 0.661 \*(m)\*\*  
## 618 1.000 \*epc:m\*  
## 217 0.300 \*(m)\*\*  
## 400 0.995 \*epc:m\*  
## 203 0.999 epc:nm  
## 103 0.712 \*(m)\*\*  
## 231 0.867 epc:nm  
## 214 0.242 \*(m)\*\*  
## 183 0.994 epc:nm  
## 175 0.755 epc:nm  
## 521 0.999 epc:nm  
## 104 0.714 \*(m)\*\*  
## 118 0.982 epc:nm  
## 534 1.000 epc:nm  
## 215 0.249 \*(m)\*\*  
## 197 0.981 \*epc:m\*  
## 163 0.951 \*epc:m\*  
## 162 0.977 epc:nm  
## 610 1.000 epc:nm  
## 225 0.186 \*(m)\*\*  
## 127 0.912 epc:nm  
## 125 0.891 epc:nm  
## 219 0.313 \*(m)\*\*  
## 213 0.223 \*(m)\*\*  
## 576 0.999 epc:nm  
## 172 0.760 \*epc:m\*  
## 533 1.000 epc:nm  
## 451 0.999 \*epc:m\*  
## 623 1.000 epc:nm  
## 156 0.616 \*(m)\*\*  
## 490 0.988 \*epc:m\*  
## 287 1.000 epc:nm  
## 200 0.994 \*epc:m\*  
## 285 1.000 epc:nm  
## 153 0.648 \*(m)\*\*  
## 128 0.860 \*epc:m\*  
## 171 0.786 epc:nm  
## 458 0.969 epc:nm  
## 232 0.807 \*epc:m\*  
## 589 0.999 epc:nm

## 141 0.980 \*epc:m\*  
## 151 0.660 \*\*(m)\*\*  
## 130 0.520 \*\*(m)\*\*  
## 221 0.127 \*\*(m)\*\*  
## 206 0.996 epc:nm  
## 468 1.000 epc:nm  
## 565 1.000 epc:nm  
## 150 0.656 \*\*(m)\*\*  
## 140 0.993 epc:nm  
## 178 0.406 \*\*(m)\*\*  
## 226 0.188 \*\*(m)\*\*  
## 357 1.000 epc:nm  
## 316 0.997 epc:nm  
## 459 0.973 epc:nm  
## 169 0.801 epc:nm  
## 290 1.000 epc:nm  
## 126 0.778 \*epc:m\*  
## 612 1.000 epc:nm  
## 157 0.600 \*\*(m)\*\*  
## 149 0.700 \*\*(m)\*\*  
## 184 0.984 epc:nm  
## 134 0.855 epc:nm  
## 161 0.970 epc:nm  
## 429 0.999 epc:nm  
## 202 0.998 epc:nm  
## 117 0.976 epc:nm  
## 461 1.000 epc:nm  
## 198 0.979 epc:nm  
## 321 1.000 epc:nm  
## 136 0.714 \*\*(m)\*\*  
## 174 0.755 epc:nm  
## 212 0.271 \*\*(m)\*\*  
## 402 1.000 epc:nm  
## 111 0.682 \*\*(m)\*\*  
## 574 0.999 epc:nm  
## 520 1.000 epc:nm  
## 176 0.723 \*\*(m)\*\*  
## 582 0.997 epc:nm  
## 195 0.998 epc:nm  
## 426 1.000 epc:nm  
## 410 1.000 epc:nm  
## 320 1.000 epc:nm  
## 312 1.000 epc:nm  
## 107 0.455 \*\*(m)\*\*  
## 505 0.999 epc:nm  
## 228 0.196 \*\*(m)\*\*  
## 230 0.851 epc:nm  
## 430 1.000 epc:nm  
## 474 0.960 epc:nm  
## 135 0.832 epc:nm  
## 536 1.000 epc:nm  
## 513 0.999 epc:nm  
## 387 1.000 epc:nm  
## 425 1.000 epc:nm

## 444 1.000 epc:nm  
## 113 0.673 \*(m)\*\*  
## 481 0.987 epc:nm  
## 334 1.000 epc:nm  
## 270 0.192 \*(m)\*\*  
## 292 1.000 epc:nm  
## 544 0.999 epc:nm  
## 114 0.563 \*(m)\*\*  
## 346 1.000 epc:nm  
## 475 0.917 epc:nm  
## 119 0.960 epc:nm  
## 177 0.466 \*(m)\*\*  
## 342 1.000 epc:nm  
## 311 0.999 epc:nm  
## 535 1.000 epc:nm  
## 299 1.000 epc:nm  
## 361 1.000 epc:nm  
## 622 1.000 epc:nm  
## 267 0.278 \*(m)\*\*  
## 222 0.134 \*(m)\*\*  
## 310 1.000 epc:nm  
## 106 0.664 \*(m)\*\*  
## 431 1.000 epc:nm  
## 480 0.986 epc:nm  
## 336 1.000 epc:nm  
## 428 0.996 epc:nm  
## 315 0.995 epc:nm  
## 489 0.476 \*(m)\*\*  
## 462 1.000 epc:nm  
## 412 1.000 epc:nm  
## 611 1.000 epc:nm  
## 497 1.000 epc:nm  
## 297 1.000 epc:nm  
## 347 1.000 epc:nm  
## 366 1.000 epc:nm  
## 617 1.000 epc:nm  
## 302 1.000 epc:nm  
## 507 0.999 epc:nm  
## 190 0.999 epc:nm  
## 515 0.189 \*(m)\*\*  
## 496 1.000 epc:nm  
## 325 1.000 (nm)  
## 575 0.998 (nm)  
## 392 1.000 (nm)  
## 549 1.000 (nm)  
## 395 0.940 (nm)  
## 467 1.000 (nm)  
## 263 0.464 (i)  
## 386 1.000 (nm)  
## 438 0.669 (i)  
## 275 0.357 (i)  
## 201 0.969 (nm)  
## 377 0.988 (nm)  
## 182 0.992 (nm)

## 409 1.000 (nm)  
## 390 1.000 (nm)  
## 482 0.995 (nm)  
## 503 0.979 (nm)  
## 264 0.360 (i)  
## 143 0.153 (i)  
## 473 0.661 (i)  
## 491 1.000 (nm)  
## 110 0.478 (i)  
## 493 1.000 (nm)  
## 443 1.000 (nm)  
## 322 1.000 (nm)  
## 309 0.835 (nm)  
## 388 1.000 (nm)  
## 463 0.995 (nm)  
## 437 0.950 (nm)  
## 449 1.000 (nm)  
## 207 0.865 (nm)  
## 192 1.000 (nm)  
## 158 0.494 (i)  
## 567 1.000 (nm)  
## 472 0.947 (nm)  
## 326 1.000 (nm)  
## 404 1.000 (nm)  
## 445 0.999 (nm)  
## 108 0.382 (i)  
## 254 0.328 (i)  
## 370 1.000 (nm)  
## 487 0.557 (i)  
## 583 0.999 (nm)  
## 403 0.991 (nm)  
## 620 0.077 (i)  
## 514 0.818 (nm)  
## 343 1.000 (nm)  
## 422 0.963 (nm)  
## 382 1.000 (nm)  
## 356 0.906 (nm)  
## 517 0.920 (nm)  
## 371 1.000 (nm)  
## 435 0.210 (i)  
## 247 0.191 (i)  
## 605 0.133 (i)  
## 558 1.000 (nm)  
## 546 1.000 (nm)  
## 434 0.867 (nm)  
## 447 0.999 (nm)  
## 423 0.999 (nm)  
## 564 0.642 (i)  
## 391 1.000 (nm)  
## 335 1.000 (nm)  
## 109 0.513 (i)  
## 548 1.000 (nm)  
## 569 0.926 (nm)  
## 531 0.813 (nm)

## 556 0.999 (nm)  
## 350 1.000 (nm)  
## 353 0.350 (i)  
## 427 1.000 (nm)  
## 348 1.000 (nm)  
## 606 0.082 (i)  
## 506 1.000 (nm)  
## 529 0.884 (nm)  
## 354 0.952 (nm)  
## 252 0.355 (i)  
## 368 1.000 (nm)  
## 288 1.000 (nm)  
## 294 1.000 (nm)  
## 585 0.289 (i)  
## 591 0.311 (i)  
## 532 1.000 (nm)  
## 308 0.993 (nm)  
## 486 0.149 (i)  
## 586 0.900 (nm)  
## 112 0.687 (i)  
## 566 1.000 (nm)  
## 539 0.967 (nm)  
## 393 1.000 (nm)  
## 399 0.783 (nm)  
## 148 0.575 (i)  
## 351 1.000 (nm)  
## 525 1.000 (nm)  
## 470 0.207 (i)  
## 508 0.990 (nm)  
## 432 1.000 (nm)  
## 339 1.000 (nm)  
## 289 1.000 (nm)  
## 492 1.000 (nm)  
## 538 1.000 (nm)  
## 607 0.231 (i)  
## 553 0.987 (nm)  
## 469 0.861 (nm)  
## 144 0.361 (i)  
## 250 0.368 (i)  
## 407 1.000 (nm)  
## 145 0.775 (nm)  
## 627 1.000 (nm)  
## 547 1.000 (nm)  
## 273 0.370 (i)  
## 185 0.765 (nm)  
## 440 0.943 (nm)  
## 523 1.000 (nm)  
## 132 0.644 (i)  
## 518 0.609 (i)  
## 323 0.996 (nm)  
## 167 0.697 (i)  
## 238 0.387 (i)  
## 537 1.000 (nm)  
## 466 1.000 (nm)

## 476 0.994 (nm)  
## 516 0.697 (i)  
## 396 0.260 (i)  
## 349 1.000 (nm)  
## 446 0.991 (nm)  
## 116 0.953 (nm)  
## 595 0.937 (nm)  
## 571 0.837 (nm)  
## 494 0.999 (nm)  
## 421 0.997 (nm)  
## 608 0.115 (i)  
## 372 1.000 (nm)  
## 179 0.519 (i)  
## 464 0.999 (nm)  
## 413 1.000 (nm)  
## 268 0.254 (i)  
## 115 0.672 (i)  
## 592 0.923 (nm)  
## 460 1.000 (nm)  
## 550 0.947 (nm)  
## 542 0.994 (nm)  
## 545 1.000 (nm)  
## 598 0.984 (nm)  
## 479 0.952 (nm)  
## 146 0.318 (i)  
## 227 0.163 (i)  
## 355 0.999 (nm)  
## 307 0.901 (nm)  
## 291 1.000 (nm)  
## 527 0.955 (nm)  
## 337 1.000 (nm)  
## 554 0.797 (nm)  
## 509 0.998 (nm)  
## 220 0.128 (i)  
## 619 1.000 (nm)  
## 398 0.985 (nm)  
## 478 0.992 (nm)  
## 577 0.928 (nm)  
## 375 0.269 (i)  
## 510 0.998 (nm)  
## 495 1.000 (nm)  
## 572 0.979 (nm)  
## 389 0.999 (nm)  
## 180 0.503 (i)  
## 269 0.273 (i)  
## 313 1.000 (nm)  
## 187 0.323 (i)  
## 629 0.083 (i)  
## 276 0.264 (i)  
## 633 1.000 (nm)  
## 300 1.000 (nm)  
## 246 0.272 (i)  
## 419 0.795 (nm)  
## 632 0.067 (i)



## 397 0.859 (nm)  
## 384 1.000 (nm)  
## 452 0.828 (nm)  
## 235 0.167 (i)  
## 394 1.000 (nm)  
## 256 0.386 (i)  
## 293 0.996 (nm)  
## 483 0.998 (nm)  
## 562 0.730 (i)  
## 327 1.000 (nm)  
## 415 0.946 (nm)  
## 266 0.356 (i)  
## 120 0.671 (i)  
## 500 0.926 (nm)  
## 526 1.000 (nm)  
## 504 0.757 (nm)  
## 530 0.990 (nm)  
## 340 0.999 (nm)  
## 330 0.215 (i)  
## 304 1.000 (nm)  
## 328 1.000 (nm)  
## 204 0.998 (nm)  
## 138 0.975 (nm)  
## 477 0.996 (nm)  
## 224 0.190 (i)  
## 123 0.711 (i)  
## 248 0.327 (i)  
## 165 0.139 (i)  
## 484 0.989 (nm)  
## 376 0.873 (nm)  
## 367 1.000 (nm)  
## 147 0.700 (i)  
## 551 0.268 (i)  
## 233 0.499 (i)  
## 573 0.758 (nm)  
## 374 0.949 (nm)  
## 416 0.267 (i)  
## 630 1.000 (nm)  
## 579 0.841 (nm)  
## 319 0.994 (nm)  
## 281 0.346 (i)  
## 242 0.345 (i)  
## 253 0.263 (i)  
## 587 0.993 (nm)  
## 205 0.980 (nm)  
## 317 0.967 (nm)  
## 405 0.999 (nm)  
## 274 0.393 (i)  
## 314 0.998 (nm)  
## 560 0.845 (nm)  
## 616 1.000 (nm)  
## 239 0.284 (i)  
## 528 0.277 (i)  
## 559 0.999 (nm)

## 359 1.000 (nm)  
## 540 0.295 (i)  
## 363 1.000 (nm)  
## 584 0.963 (nm)  
## 278 0.335 (i)  
## 234 0.109 (i)  
## 511 1.000 (nm)  
## 296 1.000 (nm)  
## 244 0.277 (i)  
## 455 0.927 (nm)  
## 604 0.050 (i)  
## 324 1.000 (nm)  
## 249 0.247 (i)  
## 265 0.347 (i)  
## 303 1.000 (nm)  
## 552 0.871 (nm)  
## 243 0.354 (i)  
## 364 0.999 (nm)  
## 597 0.855 (nm)  
## 257 0.415 (i)  
## 625 0.080 (i)  
## 588 0.833 (nm)  
## 441 0.999 (nm)  
## 241 0.358 (i)  
## 590 0.975 (nm)  
## 456 0.621 (i)  
## 631 1.000 (nm)  
## 155 0.610 (i)  
## 142 0.720 (i)  
## 378 0.800 (nm)  
## 502 0.836 (nm)  
## 338 1.000 (nm)  
## 442 0.986 (nm)  
## 229 0.792 (nm)  
## 448 0.999 (nm)  
## 255 0.332 (i)  
## 406 1.000 (nm)  
## 424 0.993 (nm)  
## 557 1.000 (nm)  
## 344 1.000 (nm)  
## 122 0.286 (i)  
## 563 0.937 (nm)  
## 191 0.989 (nm)  
## 277 0.330 (i)  
## 345 1.000 (nm)  
## 358 1.000 (nm)  
## 166 0.270 (i)  
## 485 0.683 (i)  
## 332 0.956 (nm)  
## 614 0.090 (i)  
## 282 0.124 (i)  
## 561 0.200 (i)  
## 280 0.418 (i)  
## 306 0.291 (i)

## 570 0.247 (i)  
## 599 0.778 (nm)  
## 168 0.244 (i)  
## 594 0.864 (nm)  
## 236 0.514 (i)  
## 237 0.156 (i)  
## 259 0.054 (i)  
## 245 0.253 (i)  
## 260 0.051 (i)  
## 129 0.647 (i)  
## 295 1.000 (nm)  
## 626 1.000 (nm)  
## 223 0.148 (i)  
## 488 0.815 (nm)  
## 613 1.000 (nm)  
## 194 0.997 (nm)  
## 210 0.934 (nm)  
## 139 0.989 (nm)  
## 279 0.389 (i)  
## 251 0.391 (i)  
## 498 1.000 (nm)  
## 603 0.334 (i)  
## 159 0.599 (i)  
## 581 0.762 (nm)  
## 471 0.748 (i)  
## 181 0.980 (nm)  
## 568 1.000 (nm)  
## 453 0.192 (i)  
## 600 0.073 (i)  
## 450 1.000 (nm)  
## 341 1.000 (nm)  
## 133 0.843 (nm)  
## 580 0.980 (nm)  
## 160 0.944 (nm)  
## 124 0.257 (i)  
## 436 0.756 (nm)  
## 418 0.987 (nm)  
## 362 0.992 (nm)  
## 283 0.057 (i)  
## 272 0.248 (i)  
## 541 0.906 (nm)  
## 188 0.797 (nm)  
## 383 0.990 (nm)  
## 131 0.725 (i)  
## 301 1.000 (nm)  
## 333 0.683 (i)  
## 360 0.999 (nm)  
## 578 0.249 (i)  
## 271 0.328 (i)  
## 499 1.000 (nm)  
## 512 1.000 (nm)  
## 209 0.662 (i)  
## 634 1.000 (nm)  
## 385 0.999 (nm)

```
## 261 0.389 (i)
## 305 0.964 (nm)
## 121 0.141 (i)
## 208 0.206 (i)
## 596 0.257 (i)
## 331 0.769 (nm)
## 352 0.988 (nm)
## 318 1.000 (nm)
## 196 0.989 (nm)
## 240 0.462 (i)
## 454 0.709 (i)
## 501 0.247 (i)
## 199 0.904 (nm)
## 411 1.000 (nm)
## 593 0.996 (nm)
## 258 0.343 (i)
## 211 0.580 (i)
## 189 0.291 (i)
## 373 1.000 (nm)
## 621 1.000 (nm)
## 602 0.642 (i)
## 417 0.869 (nm)
## 465 0.999 (nm)
## 543 0.841 (nm)
## 369 1.000 (nm)
## 601 0.086 (i)
## 329 0.877 (nm)
## 186 0.164 (i)
## 433 1.000 (nm)
## 615 1.000 (nm)
## 298 1.000 (nm)
## 193 0.998 (nm)
## 524 1.000 (nm)
## 262 0.285 (i)
## 284 0.063 (i)
## 365 1.000 (nm)
## 408 1.000 (nm)
## 414 1.000 (nm)
## 164 0.661 (i)
```

MODEL FIT IMPROVEMENT BY CORRELATING SOME OF THE RESIDUALS  
(correlate top 10 indicator residuals)

```

w.modelalt<-
  'persp =~ w1+ w2+ w3+ w4
  change=~w5+w6+w7 +w8
  humility=~w9+ w10+ w11+ w12
  comprres=~w13+ w14+ w15 +w16+ w17
  outsider=~w18+w19+ w20+ w21
  wow=~persp+change+humility+comprres+outsider
  class=~WorriedMoney+Uninsured+OccPres
  pclass=~Edu+Income
#residual correlations
w16~~w17
w7~~w8
w13~~w14
w1~~w3
w5~~w6'

fit.alt <- cfa(w.modelalt, data = mrbshort, estimator = "mlr",missing = "fiml")
fitMeasures(fit.alt, c("chisq", "df", "pvalue", "cfi", "tli",
                      "aic","bic","rmsea","rmsea.ci.lower","rmsea.ci.upper"))

```

|    |            |            |        |                |                |
|----|------------|------------|--------|----------------|----------------|
| ## | chisq      | df         | pvalue | cfi            | tli            |
| ## | 1399.226   | 286.000    | 0.000  | 0.951          | 0.945          |
| ## | aic        | bic        | rmsea  | rmsea.ci.lower | rmsea.ci.upper |
| ## | 166611.663 | 167127.714 | 0.043  | 0.040          | 0.045          |

```
summary(fit.alt, standardized=T,rsquare=T)
```

```

## lavaan (0.5-23.1097) converged normally after 117 iterations
##
##   Number of observations                2145
##
##   Number of missing patterns           8
##
##   Estimator                            ML      Robust
##   Minimum Function Test Statistic      1399.226 1213.434
##   Degrees of freedom                    286      286
##   P-value (Chi-square)                  0.000    0.000
##   Scaling correction factor              1.153
##     for the Yuan-Bentler correction
##
## Parameter Estimates:
##
##   Information                            Observed
##   Standard Errors                        Robust.huber.white
##
## Latent Variables:
##
##           Estimate  Std.Err  z-value  P(>|z|)  Std.lv  Std.all
##   persp =~
##     w1           1.000
##     w2           1.043    0.042   24.979   0.000    0.767    0.679
##     w3           1.233    0.032   38.020   0.000    0.799    0.659
##     w4           1.233    0.032   38.020   0.000    0.946    0.812
##     w4           1.220    0.040   30.208   0.000    0.935    0.785
##   change =~
##     w5           1.000
##     w6           0.955    0.039   24.267   0.000    0.877    0.742
##     w7           0.701    0.041   17.248   0.000    0.644    0.543
##     w8           0.649    0.053   12.337   0.000    0.597    0.497
##   humility =~
##     w9           1.000
##     w10          0.819    0.034   24.124   0.000    0.876    0.695
##     w11          0.819    0.034   24.124   0.000    0.717    0.513
##     w11          0.966    0.036   26.539   0.000    0.846    0.731
##     w12          0.807    0.040   20.337   0.000    0.707    0.573
##   compres =~
##     w13          1.000
##     w14          1.068    0.026   41.242   0.000    0.898    0.743
##     w15          1.068    0.026   41.242   0.000    0.959    0.784
##     w16          1.065    0.031   34.835   0.000    0.957    0.790
##     w17          0.724    0.035   20.571   0.000    0.650    0.537
##     w17          0.732    0.034   21.666   0.000    0.657    0.599
##   outsider =~
##     w18          1.000
##     w19          1.028    0.021   48.186   0.000    1.063    0.795
##     w20          1.028    0.021   48.186   0.000    1.093    0.837
##     w21          1.096    0.022   50.021   0.000    1.165    0.877
##     w21          0.982    0.026   38.468   0.000    1.044    0.795
##   wow =~
##     persp        1.000
##     change       1.101    0.059   18.708   0.000    0.866    0.866
##     humility     1.101    0.059   18.708   0.000    0.796    0.796
##     compres      1.096    0.046   23.591   0.000    0.831    0.831
##     outsider     1.216    0.052   23.461   0.000    0.899    0.899
##     class =~    0.770    0.044   17.396   0.000    0.481    0.481

```

```

##      WorriedMoney      1.000
##      Uninsured        5.510      0.833      6.616      0.000      1.967      0.451
##      OccPres         -4.280      0.816     -5.246      0.000     -1.528     -0.795
##      pclass =~
##      Edu              1.000
##      Income           2.112      0.607      3.482      0.000      1.041      0.564
##
## Covariances:
##              Estimate Std.Err z-value P(>|z|) Std.lv Std.all
##      .w16 ~~
##      .w17           0.434      0.029     15.113     0.000      0.434      0.484
##      .w7  ~~
##      .w8            0.476      0.036     13.189     0.000      0.476      0.458
##      .w13 ~~
##      .w14           0.184      0.027      6.876     0.000      0.184      0.300
##      .w1  ~~
##      .w3            0.188      0.022      8.512     0.000      0.188      0.334
##      .w5  ~~
##      .w6            0.113      0.057      1.986     0.047      0.113      0.190
##      wow  ~~
##      class          0.014      0.007      1.945     0.052      0.061      0.061
##      pclass        -0.021      0.014     -1.509     0.131     -0.063     -0.063
##      class  ~~
##      pclass        -0.047      0.016     -2.945     0.003     -0.267     -0.267
##
## Intercepts:
##              Estimate Std.Err z-value P(>|z|) Std.lv Std.all
##      .w1           2.838      0.024    116.500     0.000      2.838      2.515
##      .w2           2.994      0.026    114.334     0.000      2.994      2.469
##      .w3           3.065      0.025    121.866     0.000      3.065      2.631
##      .w4           3.098      0.026    120.493     0.000      3.098      2.602
##      .w5           3.281      0.026    127.953     0.000      3.281      2.763
##      .w6           3.323      0.026    130.202     0.000      3.323      2.811
##      .w7           3.370      0.026    131.587     0.000      3.370      2.841
##      .w8           3.271      0.026    126.109     0.000      3.271      2.723
##      .w9           3.062      0.027    112.630     0.000      3.062      2.432
##      .w10          2.424      0.030     80.084     0.000      2.424      1.735
##      .w11          2.827      0.025    113.184     0.000      2.827      2.444
##      .w12          2.789      0.027    104.743     0.000      2.789      2.262
##      .w13          3.190      0.026    122.228     0.000      3.190      2.639
##      .w14          3.175      0.026    120.170     0.000      3.175      2.595
##      .w15          3.146      0.026    120.298     0.000      3.146      2.598
##      .w16          3.682      0.026    140.785     0.000      3.682      3.040
##      .w17          3.601      0.024    151.962     0.000      3.601      3.281
##      .w18          2.955      0.029    102.326     0.000      2.955      2.209
##      .w19          2.820      0.028    100.064     0.000      2.820      2.161
##      .w20          2.859      0.029     99.655     0.000      2.859      2.152
##      .w21          2.892      0.028    102.074     0.000      2.892      2.204
##      .WorriedMoney 36.039      0.033   1081.723     0.000      36.039      23.290
##      .Uninsured    13.432      0.095    142.110     0.000      13.432      3.082
##      .OccPres      48.920      0.041   1178.953     0.000      48.920      25.456
##      .Edu          3.863      0.029    133.690     0.000      3.863      3.162
##      .Income       3.876      0.044     88.949     0.000      3.876      2.101
##      persp         0.000
##              0.000      0.000

```

|    |          |       |  |  |       |       |
|----|----------|-------|--|--|-------|-------|
| ## | change   | 0.000 |  |  | 0.000 | 0.000 |
| ## | humility | 0.000 |  |  | 0.000 | 0.000 |
| ## | compres  | 0.000 |  |  | 0.000 | 0.000 |
| ## | outsider | 0.000 |  |  | 0.000 | 0.000 |
| ## | wow      | 0.000 |  |  | 0.000 | 0.000 |
| ## | class    | 0.000 |  |  | 0.000 | 0.000 |
| ## | pclass   | 0.000 |  |  | 0.000 | 0.000 |

##  
## Variances:

| ## |               | Estimate | Std.Err | z-value | P(> z ) | Std.lv | Std.all |
|----|---------------|----------|---------|---------|---------|--------|---------|
| ## | .w1           | 0.685    | 0.030   | 23.028  | 0.000   | 0.685  | 0.538   |
| ## | .w2           | 0.832    | 0.033   | 25.059  | 0.000   | 0.832  | 0.566   |
| ## | .w3           | 0.462    | 0.025   | 18.493  | 0.000   | 0.462  | 0.341   |
| ## | .w4           | 0.543    | 0.026   | 20.543  | 0.000   | 0.543  | 0.383   |
| ## | .w5           | 0.566    | 0.049   | 11.664  | 0.000   | 0.566  | 0.401   |
| ## | .w6           | 0.628    | 0.078   | 8.054   | 0.000   | 0.628  | 0.449   |
| ## | .w7           | 0.992    | 0.042   | 23.753  | 0.000   | 0.992  | 0.705   |
| ## | .w8           | 1.087    | 0.043   | 25.055  | 0.000   | 1.087  | 0.753   |
| ## | .w9           | 0.819    | 0.038   | 21.521  | 0.000   | 0.819  | 0.517   |
| ## | .w10          | 1.437    | 0.044   | 32.324  | 0.000   | 1.437  | 0.737   |
| ## | .w11          | 0.622    | 0.030   | 20.496  | 0.000   | 0.622  | 0.465   |
| ## | .w12          | 1.021    | 0.040   | 25.633  | 0.000   | 1.021  | 0.671   |
| ## | .w13          | 0.654    | 0.034   | 19.456  | 0.000   | 0.654  | 0.448   |
| ## | .w14          | 0.577    | 0.034   | 17.148  | 0.000   | 0.577  | 0.385   |
| ## | .w15          | 0.552    | 0.030   | 18.470  | 0.000   | 0.552  | 0.376   |
| ## | .w16          | 1.044    | 0.035   | 29.659  | 0.000   | 1.044  | 0.712   |
| ## | .w17          | 0.773    | 0.030   | 25.486  | 0.000   | 0.773  | 0.641   |
| ## | .w18          | 0.659    | 0.032   | 20.411  | 0.000   | 0.659  | 0.368   |
| ## | .w19          | 0.509    | 0.032   | 16.017  | 0.000   | 0.509  | 0.299   |
| ## | .w20          | 0.409    | 0.028   | 14.507  | 0.000   | 0.409  | 0.231   |
| ## | .w21          | 0.632    | 0.036   | 17.636  | 0.000   | 0.632  | 0.367   |
| ## | .WorriedMoney | 2.267    | 0.089   | 25.414  | 0.000   | 2.267  | 0.947   |
| ## | .Uninsured    | 15.129   | 0.879   | 17.207  | 0.000   | 15.129 | 0.796   |
| ## | .OccPres      | 1.358    | 0.386   | 3.515   | 0.000   | 1.358  | 0.368   |
| ## | .Edu          | 1.250    | 0.081   | 15.381  | 0.000   | 1.250  | 0.837   |
| ## | .Income       | 2.321    | 0.323   | 7.191   | 0.000   | 2.321  | 0.681   |
| ## | persp         | 0.147    | 0.017   | 8.791   | 0.000   | 0.250  | 0.250   |
| ## | change        | 0.310    | 0.058   | 5.354   | 0.000   | 0.367  | 0.367   |
| ## | humility      | 0.237    | 0.026   | 9.264   | 0.000   | 0.309  | 0.309   |
| ## | compres       | 0.155    | 0.020   | 7.668   | 0.000   | 0.193  | 0.193   |
| ## | outsider      | 0.869    | 0.041   | 21.032  | 0.000   | 0.769  | 0.769   |
| ## | wow           | 0.441    | 0.030   | 14.546  | 0.000   | 1.000  | 1.000   |
| ## | class         | 0.127    | 0.034   | 3.708   | 0.000   | 1.000  | 1.000   |
| ## | pclass        | 0.243    | 0.076   | 3.184   | 0.001   | 1.000  | 1.000   |

##  
## R-Square:

| ## |    | Estimate |
|----|----|----------|
| ## | w1 | 0.462    |
| ## | w2 | 0.434    |
| ## | w3 | 0.659    |
| ## | w4 | 0.617    |
| ## | w5 | 0.599    |
| ## | w6 | 0.551    |
| ## | w7 | 0.295    |



```
##      w8           0.247
##      w9           0.483
##      w10          0.263
##      w11          0.535
##      w12          0.329
##      w13          0.552
##      w14          0.615
##      w15          0.624
##      w16          0.288
##      w17          0.359
##      w18          0.632
##      w19          0.701
##      w20          0.769
##      w21          0.633
##      WorriedMoney 0.053
##      Uninsured    0.204
##      OccPres      0.632
##      Edu           0.163
##      Income       0.319
##      persp        0.750
##      change       0.633
##      humility     0.691
##      compres      0.807
##      outsider     0.231
```

```
# excellent improvement - very good fit!
```

## ADD ESTIMATES OF LATENT VARIABLES TO THE DATASET

```
parameterEstimates(fit.alt,ci=T,rsquare=T)
```

| ##    | lhs op      | rhs          | est    | se    | z      | pvalue | ci.lower |
|-------|-------------|--------------|--------|-------|--------|--------|----------|
| ## 1  | persp ==    | w1           | 1.000  | 0.000 | NA     | NA     | 1.000    |
| ## 2  | persp ==    | w2           | 1.043  | 0.042 | 24.979 | 0.000  | 0.961    |
| ## 3  | persp ==    | w3           | 1.233  | 0.032 | 38.020 | 0.000  | 1.170    |
| ## 4  | persp ==    | w4           | 1.220  | 0.040 | 30.208 | 0.000  | 1.141    |
| ## 5  | change ==   | w5           | 1.000  | 0.000 | NA     | NA     | 1.000    |
| ## 6  | change ==   | w6           | 0.955  | 0.039 | 24.267 | 0.000  | 0.878    |
| ## 7  | change ==   | w7           | 0.701  | 0.041 | 17.248 | 0.000  | 0.621    |
| ## 8  | change ==   | w8           | 0.649  | 0.053 | 12.337 | 0.000  | 0.546    |
| ## 9  | humility == | w9           | 1.000  | 0.000 | NA     | NA     | 1.000    |
| ## 10 | humility == | w10          | 0.819  | 0.034 | 24.124 | 0.000  | 0.752    |
| ## 11 | humility == | w11          | 0.966  | 0.036 | 26.539 | 0.000  | 0.895    |
| ## 12 | humility == | w12          | 0.807  | 0.040 | 20.337 | 0.000  | 0.730    |
| ## 13 | compres ==  | w13          | 1.000  | 0.000 | NA     | NA     | 1.000    |
| ## 14 | compres ==  | w14          | 1.068  | 0.026 | 41.242 | 0.000  | 1.017    |
| ## 15 | compres ==  | w15          | 1.065  | 0.031 | 34.835 | 0.000  | 1.005    |
| ## 16 | compres ==  | w16          | 0.724  | 0.035 | 20.571 | 0.000  | 0.655    |
| ## 17 | compres ==  | w17          | 0.732  | 0.034 | 21.666 | 0.000  | 0.666    |
| ## 18 | outsider == | w18          | 1.000  | 0.000 | NA     | NA     | 1.000    |
| ## 19 | outsider == | w19          | 1.028  | 0.021 | 48.186 | 0.000  | 0.986    |
| ## 20 | outsider == | w20          | 1.096  | 0.022 | 50.021 | 0.000  | 1.053    |
| ## 21 | outsider == | w21          | 0.982  | 0.026 | 38.468 | 0.000  | 0.932    |
| ## 22 | wow ==      | persp        | 1.000  | 0.000 | NA     | NA     | 1.000    |
| ## 23 | wow ==      | change       | 1.101  | 0.059 | 18.708 | 0.000  | 0.986    |
| ## 24 | wow ==      | humility     | 1.096  | 0.046 | 23.591 | 0.000  | 1.005    |
| ## 25 | wow ==      | compres      | 1.216  | 0.052 | 23.461 | 0.000  | 1.114    |
| ## 26 | wow ==      | outsider     | 0.770  | 0.044 | 17.396 | 0.000  | 0.684    |
| ## 27 | class ==    | WorriedMoney | 1.000  | 0.000 | NA     | NA     | 1.000    |
| ## 28 | class ==    | Uninsured    | 5.510  | 0.833 | 6.616  | 0.000  | 3.877    |
| ## 29 | class ==    | OccPres      | -4.280 | 0.816 | -5.246 | 0.000  | -5.880   |
| ## 30 | pclass ==   | Edu          | 1.000  | 0.000 | NA     | NA     | 1.000    |
| ## 31 | pclass ==   | Income       | 2.112  | 0.607 | 3.482  | 0.000  | 0.923    |
| ## 32 | w16 ~~      | w17          | 0.434  | 0.029 | 15.113 | 0.000  | 0.378    |
| ## 33 | w7 ~~       | w8           | 0.476  | 0.036 | 13.189 | 0.000  | 0.405    |
| ## 34 | w13 ~~      | w14          | 0.184  | 0.027 | 6.876  | 0.000  | 0.132    |
| ## 35 | w1 ~~       | w3           | 0.188  | 0.022 | 8.512  | 0.000  | 0.145    |
| ## 36 | w5 ~~       | w6           | 0.113  | 0.057 | 1.986  | 0.047  | 0.002    |
| ## 37 | w1 ~~       | w1           | 0.685  | 0.030 | 23.028 | 0.000  | 0.627    |
| ## 38 | w2 ~~       | w2           | 0.832  | 0.033 | 25.059 | 0.000  | 0.767    |
| ## 39 | w3 ~~       | w3           | 0.462  | 0.025 | 18.493 | 0.000  | 0.413    |
| ## 40 | w4 ~~       | w4           | 0.543  | 0.026 | 20.543 | 0.000  | 0.491    |
| ## 41 | w5 ~~       | w5           | 0.566  | 0.049 | 11.664 | 0.000  | 0.471    |
| ## 42 | w6 ~~       | w6           | 0.628  | 0.078 | 8.054  | 0.000  | 0.475    |
| ## 43 | w7 ~~       | w7           | 0.992  | 0.042 | 23.753 | 0.000  | 0.910    |
| ## 44 | w8 ~~       | w8           | 1.087  | 0.043 | 25.055 | 0.000  | 1.002    |
| ## 45 | w9 ~~       | w9           | 0.819  | 0.038 | 21.521 | 0.000  | 0.745    |
| ## 46 | w10 ~~      | w10          | 1.437  | 0.044 | 32.324 | 0.000  | 1.350    |
| ## 47 | w11 ~~      | w11          | 0.622  | 0.030 | 20.496 | 0.000  | 0.563    |
| ## 48 | w12 ~~      | w12          | 1.021  | 0.040 | 25.633 | 0.000  | 0.943    |
| ## 49 | w13 ~~      | w13          | 0.654  | 0.034 | 19.456 | 0.000  | 0.588    |
| ## 50 | w14 ~~      | w14          | 0.577  | 0.034 | 17.148 | 0.000  | 0.511    |
| ## 51 | w15 ~~      | w15          | 0.552  | 0.030 | 18.470 | 0.000  | 0.493    |
| ## 52 | w16 ~~      | w16          | 1.044  | 0.035 | 29.659 | 0.000  | 0.975    |

|        |              |    |              |        |       |          |       |        |
|--------|--------------|----|--------------|--------|-------|----------|-------|--------|
| ## 53  | w17          | ~~ | w17          | 0.773  | 0.030 | 25.486   | 0.000 | 0.713  |
| ## 54  | w18          | ~~ | w18          | 0.659  | 0.032 | 20.411   | 0.000 | 0.595  |
| ## 55  | w19          | ~~ | w19          | 0.509  | 0.032 | 16.017   | 0.000 | 0.447  |
| ## 56  | w20          | ~~ | w20          | 0.409  | 0.028 | 14.507   | 0.000 | 0.353  |
| ## 57  | w21          | ~~ | w21          | 0.632  | 0.036 | 17.636   | 0.000 | 0.562  |
| ## 58  | WorriedMoney | ~~ | WorriedMoney | 2.267  | 0.089 | 25.414   | 0.000 | 2.092  |
| ## 59  | Uninsured    | ~~ | Uninsured    | 15.129 | 0.879 | 17.207   | 0.000 | 13.406 |
| ## 60  | OccPres      | ~~ | OccPres      | 1.358  | 0.386 | 3.515    | 0.000 | 0.601  |
| ## 61  | Edu          | ~~ | Edu          | 1.250  | 0.081 | 15.381   | 0.000 | 1.091  |
| ## 62  | Income       | ~~ | Income       | 2.321  | 0.323 | 7.191    | 0.000 | 1.688  |
| ## 63  | persp        | ~~ | persp        | 0.147  | 0.017 | 8.791    | 0.000 | 0.114  |
| ## 64  | change       | ~~ | change       | 0.310  | 0.058 | 5.354    | 0.000 | 0.196  |
| ## 65  | humility     | ~~ | humility     | 0.237  | 0.026 | 9.264    | 0.000 | 0.187  |
| ## 66  | compres      | ~~ | compres      | 0.155  | 0.020 | 7.668    | 0.000 | 0.116  |
| ## 67  | outsider     | ~~ | outsider     | 0.869  | 0.041 | 21.032   | 0.000 | 0.788  |
| ## 68  | wow          | ~~ | wow          | 0.441  | 0.030 | 14.546   | 0.000 | 0.381  |
| ## 69  | class        | ~~ | class        | 0.127  | 0.034 | 3.708    | 0.000 | 0.060  |
| ## 70  | pclass       | ~~ | pclass       | 0.243  | 0.076 | 3.184    | 0.001 | 0.093  |
| ## 71  | wow          | ~~ | class        | 0.014  | 0.007 | 1.945    | 0.052 | 0.000  |
| ## 72  | wow          | ~~ | pclass       | -0.021 | 0.014 | -1.509   | 0.131 | -0.048 |
| ## 73  | class        | ~~ | pclass       | -0.047 | 0.016 | -2.945   | 0.003 | -0.078 |
| ## 74  | w1           | ~1 |              | 2.838  | 0.024 | 116.500  | 0.000 | 2.790  |
| ## 75  | w2           | ~1 |              | 2.994  | 0.026 | 114.334  | 0.000 | 2.943  |
| ## 76  | w3           | ~1 |              | 3.065  | 0.025 | 121.866  | 0.000 | 3.016  |
| ## 77  | w4           | ~1 |              | 3.098  | 0.026 | 120.493  | 0.000 | 3.048  |
| ## 78  | w5           | ~1 |              | 3.281  | 0.026 | 127.953  | 0.000 | 3.231  |
| ## 79  | w6           | ~1 |              | 3.323  | 0.026 | 130.202  | 0.000 | 3.273  |
| ## 80  | w7           | ~1 |              | 3.370  | 0.026 | 131.587  | 0.000 | 3.320  |
| ## 81  | w8           | ~1 |              | 3.271  | 0.026 | 126.109  | 0.000 | 3.220  |
| ## 82  | w9           | ~1 |              | 3.062  | 0.027 | 112.630  | 0.000 | 3.009  |
| ## 83  | w10          | ~1 |              | 2.424  | 0.030 | 80.084   | 0.000 | 2.364  |
| ## 84  | w11          | ~1 |              | 2.827  | 0.025 | 113.184  | 0.000 | 2.778  |
| ## 85  | w12          | ~1 |              | 2.789  | 0.027 | 104.743  | 0.000 | 2.737  |
| ## 86  | w13          | ~1 |              | 3.190  | 0.026 | 122.228  | 0.000 | 3.139  |
| ## 87  | w14          | ~1 |              | 3.175  | 0.026 | 120.170  | 0.000 | 3.123  |
| ## 88  | w15          | ~1 |              | 3.146  | 0.026 | 120.298  | 0.000 | 3.095  |
| ## 89  | w16          | ~1 |              | 3.682  | 0.026 | 140.785  | 0.000 | 3.631  |
| ## 90  | w17          | ~1 |              | 3.601  | 0.024 | 151.962  | 0.000 | 3.555  |
| ## 91  | w18          | ~1 |              | 2.955  | 0.029 | 102.326  | 0.000 | 2.899  |
| ## 92  | w19          | ~1 |              | 2.820  | 0.028 | 100.064  | 0.000 | 2.764  |
| ## 93  | w20          | ~1 |              | 2.859  | 0.029 | 99.655   | 0.000 | 2.803  |
| ## 94  | w21          | ~1 |              | 2.892  | 0.028 | 102.074  | 0.000 | 2.837  |
| ## 95  | WorriedMoney | ~1 |              | 36.039 | 0.033 | 1081.723 | 0.000 | 35.973 |
| ## 96  | Uninsured    | ~1 |              | 13.432 | 0.095 | 142.110  | 0.000 | 13.247 |
| ## 97  | OccPres      | ~1 |              | 48.920 | 0.041 | 1178.953 | 0.000 | 48.839 |
| ## 98  | Edu          | ~1 |              | 3.863  | 0.029 | 133.690  | 0.000 | 3.807  |
| ## 99  | Income       | ~1 |              | 3.876  | 0.044 | 88.949   | 0.000 | 3.791  |
| ## 100 | persp        | ~1 |              | 0.000  | 0.000 | NA       | NA    | 0.000  |
| ## 101 | change       | ~1 |              | 0.000  | 0.000 | NA       | NA    | 0.000  |
| ## 102 | humility     | ~1 |              | 0.000  | 0.000 | NA       | NA    | 0.000  |
| ## 103 | compres      | ~1 |              | 0.000  | 0.000 | NA       | NA    | 0.000  |
| ## 104 | outsider     | ~1 |              | 0.000  | 0.000 | NA       | NA    | 0.000  |
| ## 105 | wow          | ~1 |              | 0.000  | 0.000 | NA       | NA    | 0.000  |
| ## 106 | class        | ~1 |              | 0.000  | 0.000 | NA       | NA    | 0.000  |

|        |                 |              |       |       |    |    |       |
|--------|-----------------|--------------|-------|-------|----|----|-------|
| ## 107 | pclass ~1       |              | 0.000 | 0.000 | NA | NA | 0.000 |
| ## 108 | w1 r2           | w1           | 0.462 | NA    | NA | NA | NA    |
| ## 109 | w2 r2           | w2           | 0.434 | NA    | NA | NA | NA    |
| ## 110 | w3 r2           | w3           | 0.659 | NA    | NA | NA | NA    |
| ## 111 | w4 r2           | w4           | 0.617 | NA    | NA | NA | NA    |
| ## 112 | w5 r2           | w5           | 0.599 | NA    | NA | NA | NA    |
| ## 113 | w6 r2           | w6           | 0.551 | NA    | NA | NA | NA    |
| ## 114 | w7 r2           | w7           | 0.295 | NA    | NA | NA | NA    |
| ## 115 | w8 r2           | w8           | 0.247 | NA    | NA | NA | NA    |
| ## 116 | w9 r2           | w9           | 0.483 | NA    | NA | NA | NA    |
| ## 117 | w10 r2          | w10          | 0.263 | NA    | NA | NA | NA    |
| ## 118 | w11 r2          | w11          | 0.535 | NA    | NA | NA | NA    |
| ## 119 | w12 r2          | w12          | 0.329 | NA    | NA | NA | NA    |
| ## 120 | w13 r2          | w13          | 0.552 | NA    | NA | NA | NA    |
| ## 121 | w14 r2          | w14          | 0.615 | NA    | NA | NA | NA    |
| ## 122 | w15 r2          | w15          | 0.624 | NA    | NA | NA | NA    |
| ## 123 | w16 r2          | w16          | 0.288 | NA    | NA | NA | NA    |
| ## 124 | w17 r2          | w17          | 0.359 | NA    | NA | NA | NA    |
| ## 125 | w18 r2          | w18          | 0.632 | NA    | NA | NA | NA    |
| ## 126 | w19 r2          | w19          | 0.701 | NA    | NA | NA | NA    |
| ## 127 | w20 r2          | w20          | 0.769 | NA    | NA | NA | NA    |
| ## 128 | w21 r2          | w21          | 0.633 | NA    | NA | NA | NA    |
| ## 129 | WorriedMoney r2 | WorriedMoney | 0.053 | NA    | NA | NA | NA    |
| ## 130 | Uninsured r2    | Uninsured    | 0.204 | NA    | NA | NA | NA    |
| ## 131 | OccPres r2      | OccPres      | 0.632 | NA    | NA | NA | NA    |
| ## 132 | Edu r2          | Edu          | 0.163 | NA    | NA | NA | NA    |
| ## 133 | Income r2       | Income       | 0.319 | NA    | NA | NA | NA    |
| ## 134 | persp r2        | persp        | 0.750 | NA    | NA | NA | NA    |
| ## 135 | change r2       | change       | 0.633 | NA    | NA | NA | NA    |
| ## 136 | humility r2     | humility     | 0.691 | NA    | NA | NA | NA    |
| ## 137 | comprres r2     | comprres     | 0.807 | NA    | NA | NA | NA    |
| ## 138 | outsider r2     | outsider     | 0.231 | NA    | NA | NA | NA    |
| ##     | ci.upper        |              |       |       |    |    |       |
| ## 1   | 1.000           |              |       |       |    |    |       |
| ## 2   | 1.125           |              |       |       |    |    |       |
| ## 3   | 1.297           |              |       |       |    |    |       |
| ## 4   | 1.299           |              |       |       |    |    |       |
| ## 5   | 1.000           |              |       |       |    |    |       |
| ## 6   | 1.032           |              |       |       |    |    |       |
| ## 7   | 0.781           |              |       |       |    |    |       |
| ## 8   | 0.752           |              |       |       |    |    |       |
| ## 9   | 1.000           |              |       |       |    |    |       |
| ## 10  | 0.885           |              |       |       |    |    |       |
| ## 11  | 1.038           |              |       |       |    |    |       |
| ## 12  | 0.885           |              |       |       |    |    |       |
| ## 13  | 1.000           |              |       |       |    |    |       |
| ## 14  | 1.119           |              |       |       |    |    |       |
| ## 15  | 1.125           |              |       |       |    |    |       |
| ## 16  | 0.793           |              |       |       |    |    |       |
| ## 17  | 0.798           |              |       |       |    |    |       |
| ## 18  | 1.000           |              |       |       |    |    |       |
| ## 19  | 1.069           |              |       |       |    |    |       |
| ## 20  | 1.139           |              |       |       |    |    |       |
| ## 21  | 1.032           |              |       |       |    |    |       |

|       |        |
|-------|--------|
| ## 22 | 1.000  |
| ## 23 | 1.216  |
| ## 24 | 1.187  |
| ## 25 | 1.317  |
| ## 26 | 0.857  |
| ## 27 | 1.000  |
| ## 28 | 7.142  |
| ## 29 | -2.681 |
| ## 30 | 1.000  |
| ## 31 | 3.301  |
| ## 32 | 0.491  |
| ## 33 | 0.546  |
| ## 34 | 0.237  |
| ## 35 | 0.231  |
| ## 36 | 0.225  |
| ## 37 | 0.744  |
| ## 38 | 0.897  |
| ## 39 | 0.511  |
| ## 40 | 0.595  |
| ## 41 | 0.661  |
| ## 42 | 0.780  |
| ## 43 | 1.074  |
| ## 44 | 1.172  |
| ## 45 | 0.894  |
| ## 46 | 1.524  |
| ## 47 | 0.682  |
| ## 48 | 1.100  |
| ## 49 | 0.720  |
| ## 50 | 0.643  |
| ## 51 | 0.610  |
| ## 52 | 1.113  |
| ## 53 | 0.832  |
| ## 54 | 0.722  |
| ## 55 | 0.571  |
| ## 56 | 0.464  |
| ## 57 | 0.703  |
| ## 58 | 2.442  |
| ## 59 | 16.852 |
| ## 60 | 2.116  |
| ## 61 | 1.409  |
| ## 62 | 2.953  |
| ## 63 | 0.180  |
| ## 64 | 0.423  |
| ## 65 | 0.287  |
| ## 66 | 0.195  |
| ## 67 | 0.950  |
| ## 68 | 0.500  |
| ## 69 | 0.195  |
| ## 70 | 0.393  |
| ## 71 | 0.029  |
| ## 72 | 0.006  |
| ## 73 | -0.016 |
| ## 74 | 2.886  |
| ## 75 | 3.046  |

|        |        |
|--------|--------|
| ## 76  | 3.114  |
| ## 77  | 3.149  |
| ## 78  | 3.331  |
| ## 79  | 3.373  |
| ## 80  | 3.420  |
| ## 81  | 3.322  |
| ## 82  | 3.116  |
| ## 83  | 2.483  |
| ## 84  | 2.876  |
| ## 85  | 2.841  |
| ## 86  | 3.241  |
| ## 87  | 3.227  |
| ## 88  | 3.197  |
| ## 89  | 3.733  |
| ## 90  | 3.648  |
| ## 91  | 3.012  |
| ## 92  | 2.875  |
| ## 93  | 2.915  |
| ## 94  | 2.948  |
| ## 95  | 36.104 |
| ## 96  | 13.618 |
| ## 97  | 49.001 |
| ## 98  | 3.920  |
| ## 99  | 3.962  |
| ## 100 | 0.000  |
| ## 101 | 0.000  |
| ## 102 | 0.000  |
| ## 103 | 0.000  |
| ## 104 | 0.000  |
| ## 105 | 0.000  |
| ## 106 | 0.000  |
| ## 107 | 0.000  |
| ## 108 | NA     |
| ## 109 | NA     |
| ## 110 | NA     |
| ## 111 | NA     |
| ## 112 | NA     |
| ## 113 | NA     |
| ## 114 | NA     |
| ## 115 | NA     |
| ## 116 | NA     |
| ## 117 | NA     |
| ## 118 | NA     |
| ## 119 | NA     |
| ## 120 | NA     |
| ## 121 | NA     |
| ## 122 | NA     |
| ## 123 | NA     |
| ## 124 | NA     |
| ## 125 | NA     |
| ## 126 | NA     |
| ## 127 | NA     |
| ## 128 | NA     |
| ## 129 | NA     |

```
## 130      NA
## 131      NA
## 132      NA
## 133      NA
## 134      NA
## 135      NA
## 136      NA
## 137      NA
## 138      NA
```

```
summary(lavPredict(fit.alt))
```

```
##      persp      change      humility
## Min.   :-1.69955  Min.   :-2.18355  Min.   :-1.8874
## 1st Qu.: -0.46412  1st Qu.: -0.52480  1st Qu.: -0.5022
## Median :  0.02414  Median :  0.04439  Median :  0.0337
## Mean   :  0.00000  Mean   :  0.00000  Mean   :  0.0000
## 3rd Qu.:  0.51733  3rd Qu.:  0.57863  3rd Qu.:  0.5244
## Max.   :  1.59258  Max.   :  1.75261  Max.   :  1.9664
##      compres      outsider      wow
## Min.   :-2.13371  Min.   :-1.74057  Min.   :-1.64460
## 1st Qu.: -0.53282  1st Qu.: -0.75834  1st Qu.: -0.38452
## Median :  0.06237  Median :  0.05843  Median :  0.02187
## Mean   :  0.00000  Mean   :  0.00000  Mean   :  0.00000
## 3rd Qu.:  0.60374  3rd Qu.:  0.78219  3rd Qu.:  0.41912
## Max.   :  1.78653  Max.   :  1.93735  Max.   :  1.48426
##      class      pclass
## Min.   :-1.58055  Min.   :-0.772979
## 1st Qu.: -0.18041  1st Qu.: -0.205624
## Median :  0.06595  Median : -0.006738
## Mean   :  0.00000  Mean   :  0.000000
## 3rd Qu.:  0.15325  3rd Qu.:  0.190556
## Max.   :  0.74222  Max.   :  1.119645
```

```
estimates<-as.data.frame(lavPredict(fit.alt))#save estimated factor scores
```

add estimates scores to the original dataset

```

mrbclean$wow<-estimates$wow
mrbclean$persp<-estimates$persp
mrbclean$change<-estimates$change
mrbclean$humility<-estimates$humility
mrbclean$compres<-estimates$compres
mrbclean$outsider<-estimates$outsider
mrbclean$stateclassr<-estimates$class
mrbclean$stateclass<-mrbclean$stateclassr*(-1)
mrbclean$personalclass<-estimates$pclass

#examine SE of group and within-group variability

W<-ddply(mrbclean[c("State","wow")], "State", transform,
         wowB = mean(wow))
mrbclean$wowB<-unlist(W[c("wowB")])
mrbclean$wowW<-mrbclean$wow-mrbclean$wowB

sd(mrbclean$wowB)/sqrt(length(mrbclean$wowB))

```

```
## [1] 0.001963809
```

```
sd(mrbclean$wowW)/sqrt(length(mrbclean$wowW))
```

```
## [1] 0.0133269
```

obtain individual and state-level effect of social class based on individual-level estimates. hereby, indiv.-level reflects deviation from state average score.

```

d<-ddply(mrbclean[c("State","personalclass")], "State", transform,
         personalclassB = mean(personalclass))
mrbclean$personalclassSTATEAV<-unlist(d[c("personalclassB")])
mrbclean$personalclassDIFFFROMSTATEAV<-mrbclean$personalclass-mrbclean$personalclassSTATEAV

```

## EXAMINE REGIONAL-LEVEL EFFECTS by STATES, and across States nested in REGIONS

prepare data first (average scores across states, such that state is the unit of analysis)



```

mrbcleanSmall <- subset(mrbclean, filter.dup=="0"|filter.dup=="NA",
select=c(StateString,SAT,wow,persp,humility,comprres,
change,outsider,stateclass,personalclass,Population,State,Region,OccPres))
mrbcleanSmall$StateString<-strtrim(mrbcleanSmall$StateString, 20)
estimatesReg<-as.data.frame(mrbcleanSmall %>%
  group_by(StateString) %>% summarise_all(funs(mean)))
mrbcleanSmall$StateString<-strtrim(mrbcleanSmall$StateString, 20)
countstate<-as.data.frame(dplyr::count(mrbcleanSmall, StateString))
estimateState<-full_join(estimatesReg, countstate, by = "StateString")

estimateState$Region <- factor(estimateState$Region,
levels = c(4,7,6,5,8,3,1,2),
labels = c("Far West", "Great Lakes", "Mideast", "New England",
"Plains", "Rocky Mountains", "Southeast", "Southwest"))

```

examine how many participants are in each state and how the count varies by size of the state

```

table_score<-as.data.frame(estimateState[c("StateString","n","Population")])

```

## Participant Number by State

```

table_score

```

| ##    | StateString          | n   | Population |
|-------|----------------------|-----|------------|
| ## 1  | alabama              | 23  | 4849377    |
| ## 2  | arizona              | 39  | 6731484    |
| ## 3  | arkansas             | 17  | 2966369    |
| ## 4  | california           | 204 | 38802500   |
| ## 5  | colorado             | 31  | 5355866    |
| ## 6  | connecticut          | 19  | 3596677    |
| ## 7  | delaware             | 9   | 935614     |
| ## 8  | district of columbia | 10  | 658893     |
| ## 9  | florida              | 141 | 19893297   |
| ## 10 | georgia              | 81  | 10097343   |
| ## 11 | idaho                | 11  | 1634464    |
| ## 12 | illinois             | 82  | 12880580   |
| ## 13 | indiana              | 40  | 6596855    |
| ## 14 | iowa                 | 22  | 3107126    |
| ## 15 | kansas               | 54  | 2904021    |
| ## 16 | kentucky             | 40  | 4413457    |
| ## 17 | louisiana            | 21  | 4649676    |
| ## 18 | maine                | 7   | 1330089    |
| ## 19 | maryland             | 42  | 5976407    |
| ## 20 | massachusetts        | 52  | 6745408    |
| ## 21 | michigan             | 87  | 9909877    |
| ## 22 | minnesota            | 38  | 5457173    |
| ## 23 | mississippi          | 12  | 2994079    |
| ## 24 | missouri             | 54  | 6063589    |
| ## 25 | montana              | 10  | 1023579    |
| ## 26 | nebraska             | 16  | 1881503    |
| ## 27 | nevada               | 23  | 2839099    |
| ## 28 | new hampshire        | 15  | 1326813    |
| ## 29 | new jersey           | 56  | 8938175    |
| ## 30 | new mexico           | 14  | 2085572    |
| ## 31 | new york             | 145 | 19746227   |
| ## 32 | north carolina       | 89  | 9943964    |
| ## 33 | north dakota         | 1   | 739482     |
| ## 34 | ohio                 | 99  | 11594163   |
| ## 35 | oklahoma             | 18  | 3878051    |
| ## 36 | oregon               | 24  | 3970239    |
| ## 37 | pennsylvania         | 107 | 12787209   |
| ## 38 | rhode island         | 7   | 1055173    |
| ## 39 | south carolina       | 26  | 4832482    |
| ## 40 | south dakota         | 2   | 853175     |
| ## 41 | tennessee            | 51  | 6549352    |
| ## 42 | texas                | 116 | 26956958   |
| ## 43 | utah                 | 13  | 2942902    |
| ## 44 | vermont              | 5   | 626562     |
| ## 45 | virginia             | 69  | 8326289    |
| ## 46 | washington           | 36  | 7061530    |
| ## 47 | west virginia        | 13  | 1850326    |
| ## 48 | wisconsin            | 53  | 5757564    |
| ## 49 | wyoming              | 1   | 584153     |

```
summary(table_score$n)
```

```
##      Min. 1st Qu.  Median    Mean 3rd Qu.    Max.
##      1.00  13.00   26.00   43.78   54.00  204.00
```

most states have at least 10 datapoints, exceptions: delaware, maine, N & S. dakota, rhode island, vermont \*  
wyoming - smaller states

```
cor(estimateState$Population,estimateState$n,method = c("pearson"))
```

```
## [1] 0.9440492
```

```
#r = .94 # population size very closely correlated to the number of participants per state
cor(estimateState$Population,estimateState$n,method = c("kendall"))
```

```
## [1] 0.8298544
```

```
#when examining ordinal correlations, tau = .83==> very high!
```

```
ggplot()+geom_point(data=estimateState, aes(x=n, y=StateString,color="Participants",
  shape="Participants"))+ labs(x="Size",y="State")+theme_light()+
  geom_point(data=estimateState, aes(x=Population/100000,y=StateString,
    color="Population/100K",shape="Population/100K"))+
  scale_colour_manual(values=c("Participants"="#d95f02", "Population/100K"="#7570b3"))+
  scale_shape_discrete()+geom_vline(xintercept=c(15), linetype="dotted")+
  theme(legend.justification=c(.97,0), legend.position=c(.98,.44))+theme(legend.title=element_bla
nk())
```

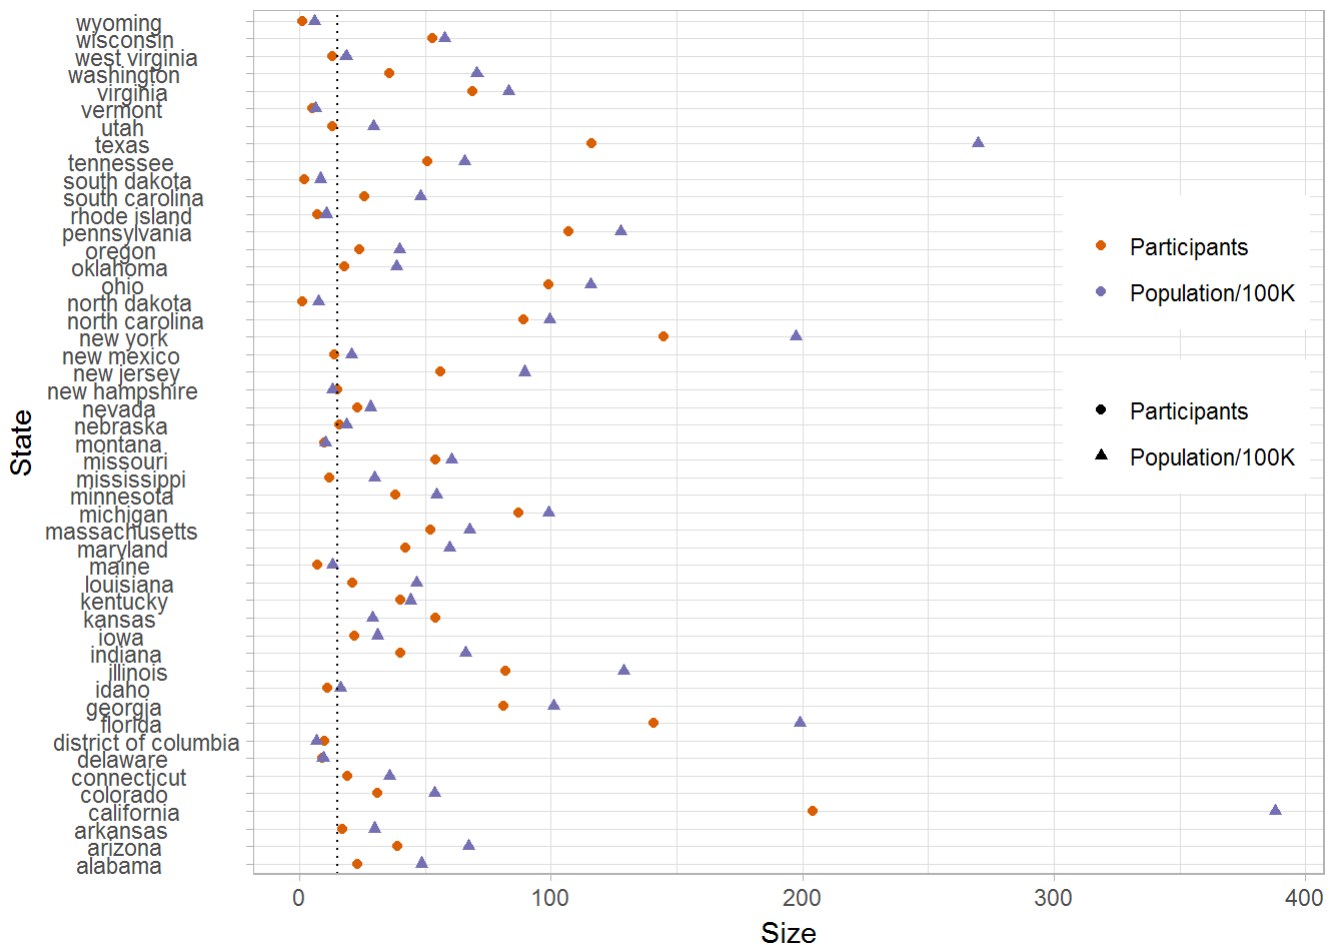

reduce state-specific sample, so that only states with 25+ participants/state included

(to ensure sufficient N per state).

```
estimatesStateclean <- estimateState[ which(estimateState$n>24) , ]
cor(estimatesStateclean$stateclass,estimatesStateclean$wow)
```

```
## [1] -0.3907578
```

```
cor(estimatesStateclean$stateclass,estimatesStateclean$persp)
```

```
## [1] -0.2968698
```

```
cor(estimatesStateclean$stateclass,estimatesStateclean$humility)
```

```
## [1] -0.367001
```

```
cor(estimatesStateclean$stateclass,estimatesStateclean$compres)
```

```
## [1] -0.2707067
```

```
cor(estimatesStateclean$stateclass,estimatesStateclean$change)
```

```
## [1] -0.2783828
```

```
cor(estimatesStateclean$stateclass,estimatesStateclean$outsider)
```

```
## [1] -0.5224024
```

strongest effect for outsider perspective, weakest effect for change/compromise+resolution. All state-level effects are below  $r=-.27$

```
ggplot(estimatesStateclean, aes(x=stateclass, y=wow)) +  
  geom_point(shape=19) +  
  geom_smooth(color="black",method=lm)+ # Add Linear regression Line  
  geom_rug(sides = "bl")+  
  theme_classic() +labs(x = "Status of the State (z-score)",  
                        y = "Wise Reasoning Index (z-score)")
```

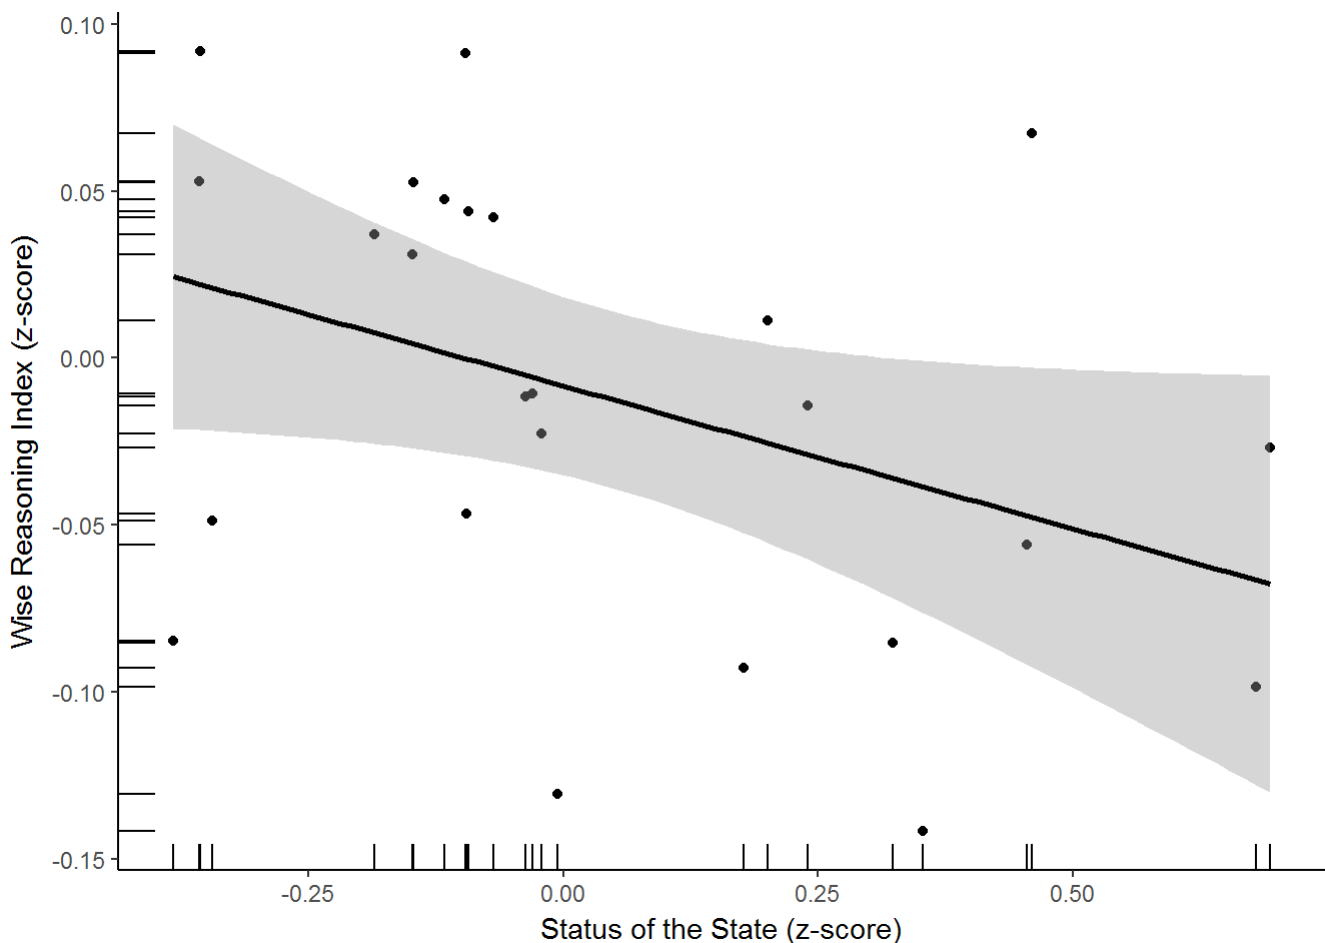

```

ggplot(estimatesStateclean, aes(x=stateclass, y=persp)) +
  geom_point(shape=19) + # Use hollow circles
  geom_smooth(color="black",method=lm)+ # Add linear regression line
  geom_rug(sides = "bl")+
  theme_classic() +labs(x = "Status of the State (z-score)",
  y = "Consideration of Others' Perspectives (z-score)")

```

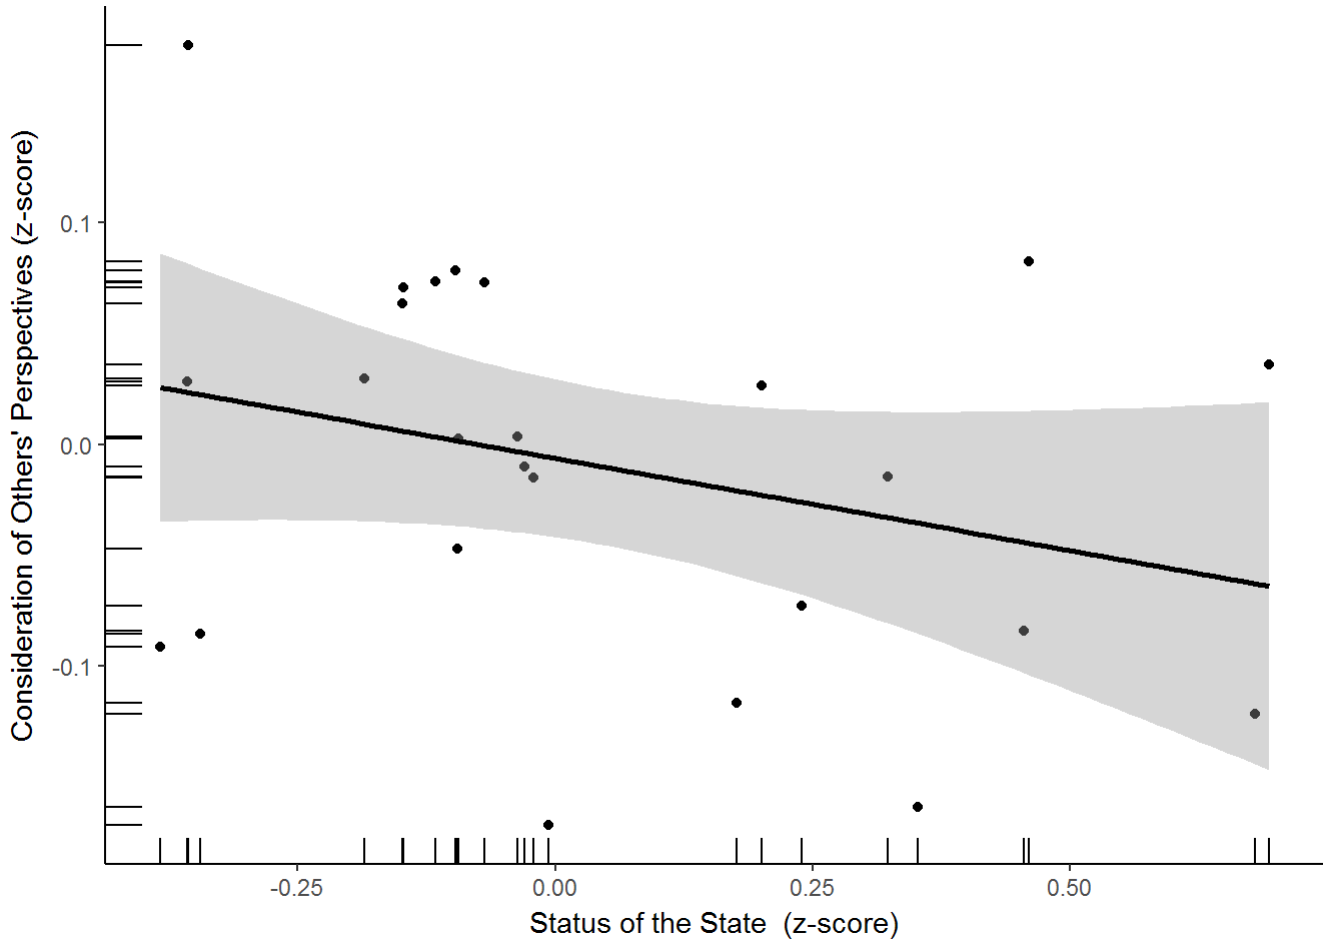

```

ggplot(estimatesStateclean, aes(x=stateclass, y=change)) +
  geom_point(shape=19) + # Use hollow circles
  geom_smooth(color="black",method=lm)+ # Add linear regression line
  geom_rug(sides = "bl")+
  theme_classic() +labs(x = "Status of the State (z-score)",
  y = "Recognition of Change (z-score)")

```

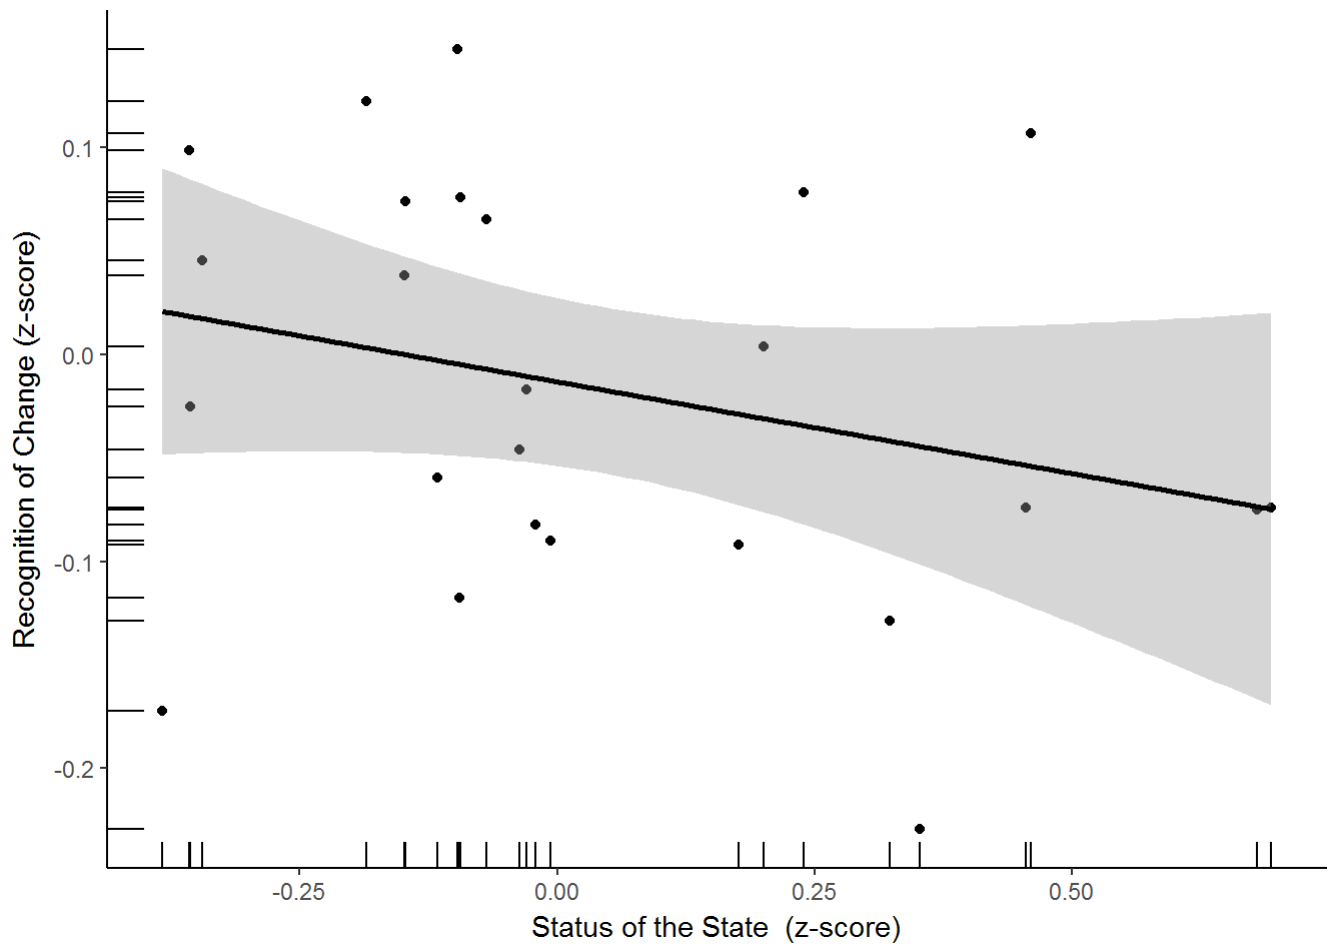

```

ggplot(estimatesStateclean, aes(x=stateclass, y=humility)) +
  geom_point(shape=19) + # Use hollow circles
  geom_smooth(color="black",method=lm)+ # Add linear regression line
  geom_rug(sides = "b1")+
  theme_classic() +labs(x = "Status of the State (z-score)",
                        y = "Intellectual Humility (z-score)")

```

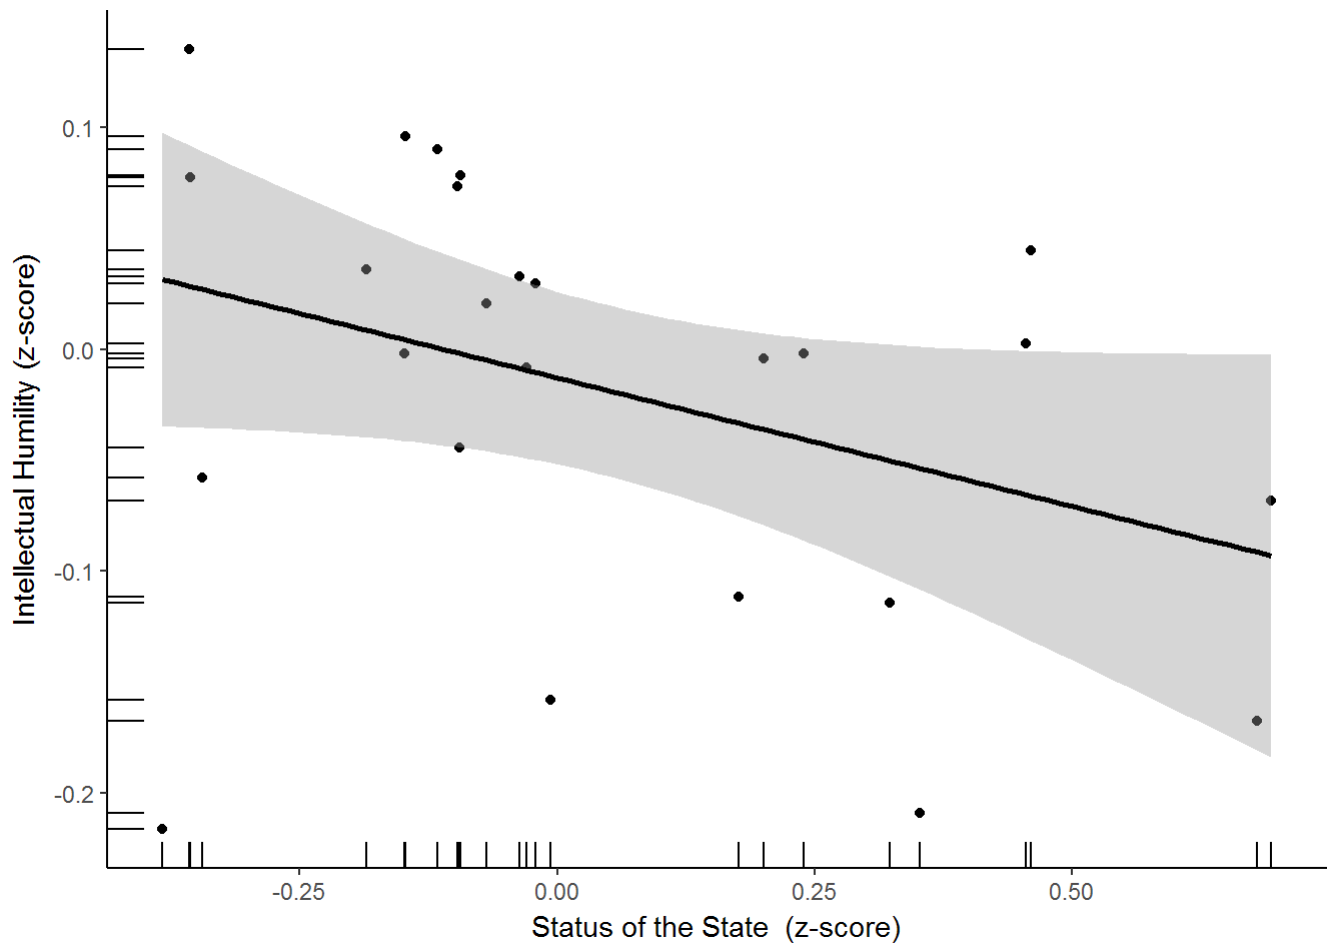

```

ggplot(estimatesStateclean, aes(x=stateclass, y=comprres)) +
  geom_point(shape=19) + # Use hollow circles
  geom_smooth(color="black",method=lm)+ # Add linear regression line
  geom_rug(sides = "b1")+
  theme_classic() +labs(x = "States: High to Low Status (z-score)",
                        y = "Search for Compromise/Resolution (z-score)")

```





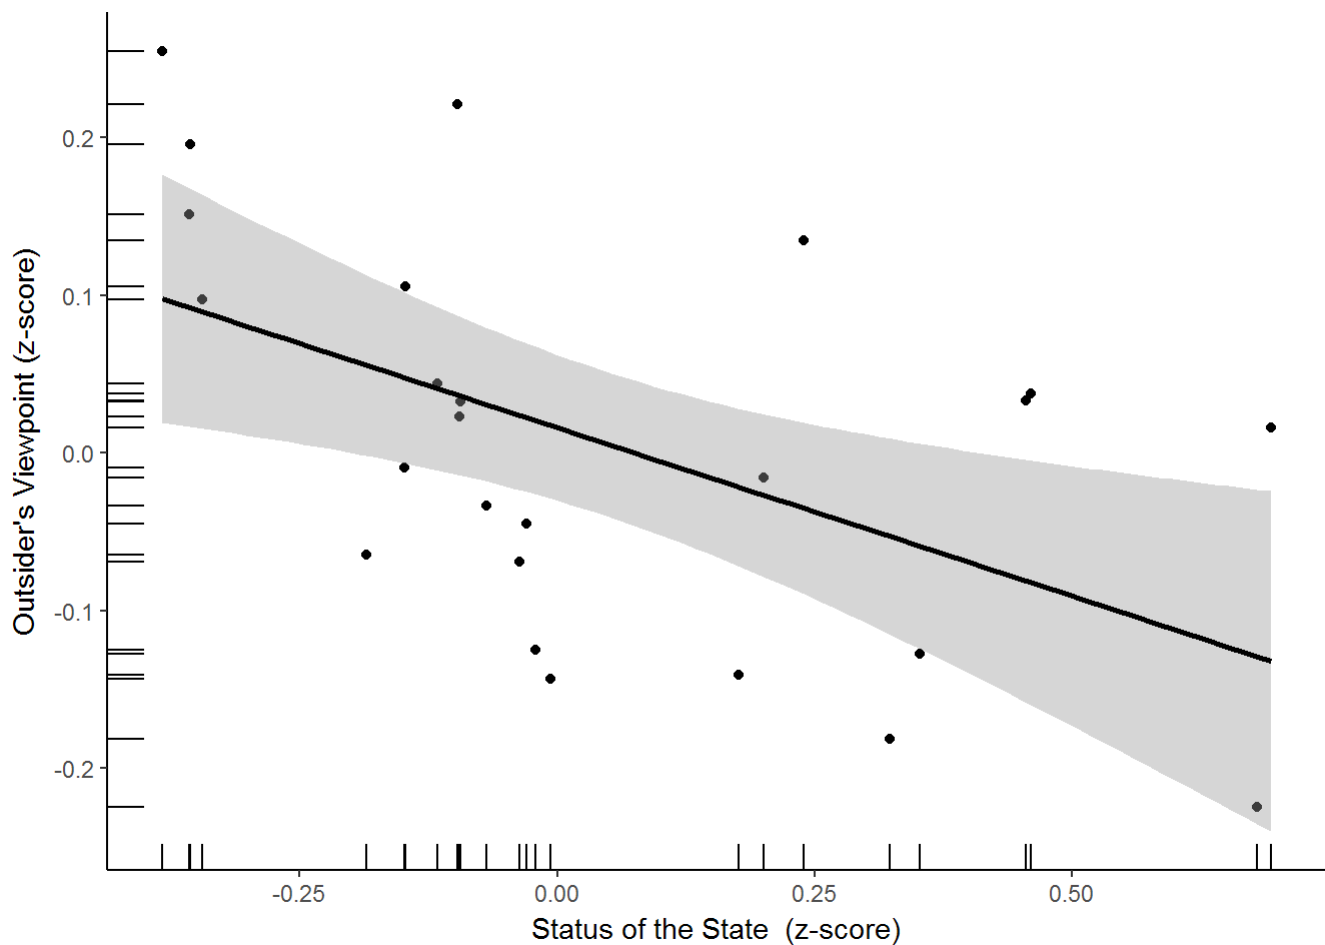

what is the correlation between OccPres index alone and wise reasoning?

```
cor(estimateStateclean$OccPres,estimateStateclean$wow)
```

```
## [1] -0.3390648
```

```
cor(estimateStateclean$OccPres,estimateStateclean$persp)
```

```
## [1] -0.2628904
```

```
cor(estimateStateclean$OccPres,estimateStateclean$humility)
```

```
## [1] -0.3321925
```

```
cor(estimateStateclean$OccPres,estimateStateclean$compres)
```

```
## [1] -0.2090052
```

```
cor(estimateStateclean$OccPres,estimateStateclean$change)
```



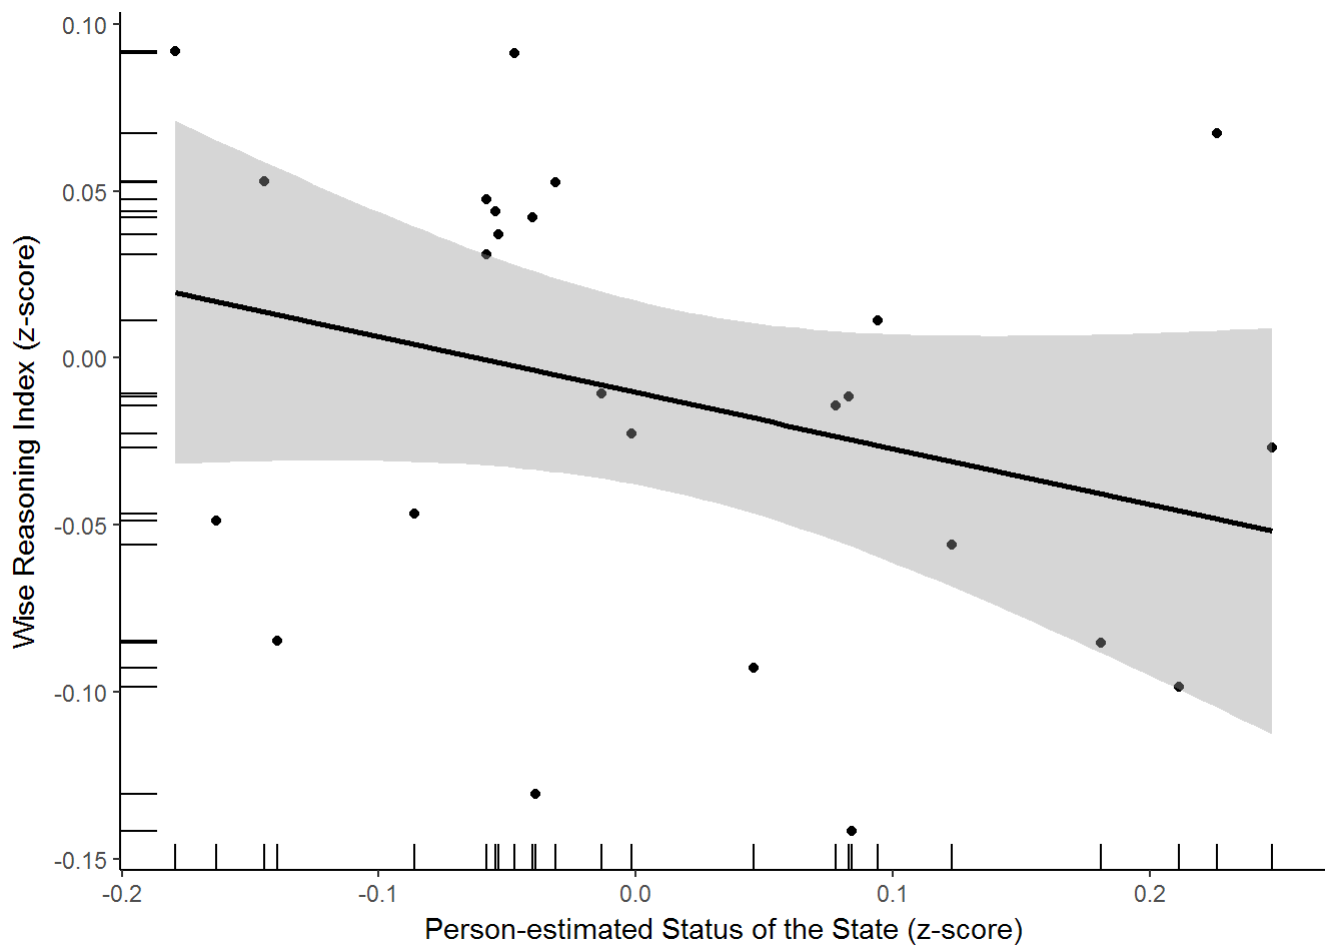

re-run correlations with state-level aggregates of participants' own estimates of status

```
cor(estimatesStateclean$personalclass,estimatesStateclean$wow) #cor = -.30
```

```
## [1] -0.3012466
```

```
cor(estimatesStateclean$personalclass,estimatesStateclean$persp) #cor = -.19
```

```
## [1] -0.1868936
```

```
cor(estimatesStateclean$personalclass,estimatesStateclean$humility) #cor = -.28
```

```
## [1] -0.281258
```

```
cor(estimatesStateclean$personalclass,estimatesStateclean$compres) #cor = -.21
```

```
## [1] -0.2070563
```

```
cor(estimateStateclean$personalclass,estimateStateclean$change) #cor = -.20
```

```
## [1] -0.2035508
```

```
cor(estimateStateclean$personalclass,estimateStateclean$outsider) #cor = -.52
```

```
## [1] -0.5264502
```

```
#####
```

## REPLICATE WITH different cut-offs - 10 and 15

```
#####
```

reduce state-specific sample, so that only states with 10+ participants per state are included.

```
estimateStateclean10 <- estimateState[ which(estimateState$n>10) , ]  
cor(estimateStateclean10$stateclass,estimateStateclean10$wow)
```

```
## [1] -0.3919163
```

```
cor(estimateStateclean10$stateclass,estimateStateclean10$persp)
```

```
## [1] -0.3590248
```

```
cor(estimateStateclean10$stateclass,estimateStateclean10$humility)
```

```
## [1] -0.347325
```

```
cor(estimateStateclean10$stateclass,estimateStateclean10$compres)
```

```
## [1] -0.3641408
```

```
cor(estimateStateclean10$stateclass,estimateStateclean10$change)
```

```
## [1] -0.3177701
```

```
cor(estimateStateclean10$stateclass,estimateStateclean10$outsider)
```

```
## [1] -0.4125891
```

strongest effect for outsider perspective, weakest effect for change. All state-level effects are below  $r=-.30!$

```
#####
```

## with 15+

```
#####
```

reduce state-specific sample, so that only states with 15+ participants per state are included.

```
estimatesStateclean15 <- estimateState[ which(estimateState$n>15) , ]  
cor(estimatesStateclean15$stateclass,estimatesStateclean15$wow)
```

```
## [1] -0.3457941
```

```
cor(estimatesStateclean15$stateclass,estimatesStateclean15$persp)
```

```
## [1] -0.279155
```

```
cor(estimatesStateclean15$stateclass,estimatesStateclean15$humility)
```

```
## [1] -0.3032005
```

```
cor(estimatesStateclean15$stateclass,estimatesStateclean15$compres)
```

```
## [1] -0.2881071
```

```
cor(estimatesStateclean15$stateclass,estimatesStateclean15$change)
```

```
## [1] -0.3178294
```

```
cor(estimatesStateclean15$stateclass,estimatesStateclean15$outsider)
```

```
## [1] -0.3697534
```

strongest effect for outsider perspective, weakest effect for change. All state-level effects are below  $r=-.27$

#replicate results, using mixed effects model, with random intercept (i.e., participants' scores NESTED within their states), including ALL participants

```

state.wow<-lmer(wow ~ stateclass+(1|State), mrbclean, REML=F)
state.persp<-lmer(persp ~ stateclass+(1|State), mrbclean, REML=F)
state.humility<-lmer(humility ~ stateclass+(1|State), mrbclean, REML=F)
state.comprres<-lmer(comprres ~ stateclass+(1|State), mrbclean, REML=F)
state.change<-lmer(change ~ stateclass+(1|State), mrbclean, REML=F)
state.outsider<-lmer(outsider ~ stateclass+(1|State), mrbclean, REML=F)

```

## Effect of State-level class on wise reasoning

```
summary(state.wow)
```

```

## Linear mixed model fit by maximum likelihood t-tests use Satterthwaite
## approximations to degrees of freedom [lmerMod]
## Formula: wow ~ stateclass + (1 | State)
## Data: mrbclean
##
##      AIC      BIC   logLik deviance df.resid
## 3981.0   4003.7 -1986.5  3973.0    2141
##
## Scaled residuals:
##      Min       1Q   Median       3Q      Max
## -2.71213 -0.63822  0.04342  0.68874  2.46352
##
## Random effects:
## Groups   Name      Variance Std.Dev.
## State    (Intercept) 0.0000   0.0000
## Residual                0.3732   0.6109
## Number of obs: 2145, groups: State, 49
##
## Fixed effects:
##              Estimate      Std. Error      df t value
## (Intercept)  0.00000001939   0.013190292240 2145.000000000000  0.000
## stateclass   -0.161423754101   0.045047488250 2145.000000000000 -3.583
##              Pr(>|t|)
## (Intercept) 1.000000
## stateclass  0.000347 ***
## ---
## Signif. codes:  0 '***' 0.001 '**' 0.01 '*' 0.05 '.' 0.1 ' ' 1
##
## Correlation of Fixed Effects:
##              (Intr)
## stateclass  0.000

```

compare individual estimates of occupational prestige alone

```
summary(state.wow<-lmer(wow ~ OccPres+(1|State), mrbclean, REML=F)
)
```

```

## Linear mixed model fit by maximum likelihood t-tests use Satterthwaite
## approximations to degrees of freedom [lmerMod]
## Formula: wow ~ OccPres + (1 | State)
## Data: mrbclean
##
##      AIC      BIC   logLik deviance df.resid
## 3988.7  4011.4 -1990.4  3980.7    2141
##
## Scaled residuals:
##      Min       1Q   Median       3Q      Max
## -2.69661 -0.62911  0.04288  0.68348  2.44810
##
## Random effects:
## Groups   Name      Variance Std.Dev.
## State    (Intercept) 0.0000   0.000
## Residual                0.3745   0.612
## Number of obs: 2145, groups: State, 49
##
## Fixed effects:
##              Estimate Std. Error      df t value Pr(>|t|)
## (Intercept)  0.761008   0.336628 2145.000000   2.261  0.0239 *
## OccPres     -0.015556   0.006876 2145.000000  -2.262  0.0238 *
## ---
## Signif. codes:  0 '***' 0.001 '**' 0.01 '*' 0.05 '.' 0.1 ' ' 1
##
## Correlation of Fixed Effects:
##              (Intr)
## OccPres -0.999

```

## Effect of State-level class on recognition of change/ multiple ways a situation may unfold

```
summary(state.change)
```



```

## Linear mixed model fit by maximum likelihood t-tests use Satterthwaite
## approximations to degrees of freedom [lmerMod]
## Formula: change ~ stateclass + (1 | State)
## Data: mrbclean
##
##      AIC      BIC   logLik deviance df.resid
##  5233.3   5256.0  -2612.6   5225.3     2141
##
## Scaled residuals:
##      Min       1Q   Median       3Q      Max
## -2.71655 -0.63932  0.05781  0.70855  2.22678
##
## Random effects:
## Groups Name      Variance      Std.Dev.
## State  (Intercept) 0.000000000000006119 0.0000002474
## Residual          0.6690826876016711111 0.81797474753
## Number of obs: 2145, groups: State, 49
##
## Fixed effects:
##              Estimate      Std. Error      df t value
## (Intercept) -0.00000007719   0.017661445606 2145.000000000000  0.000
## stateclass  -0.190731676776   0.060317371969 2145.000000000000 -3.162
##              Pr(>|t|)
## (Intercept)  1.00000
## stateclass   0.00159 **
## ---
## Signif. codes:  0 '***' 0.001 '**' 0.01 '*' 0.05 '.' 0.1 ' ' 1
##
## Correlation of Fixed Effects:
##              (Intr)
## stateclass  0.000

```

## Effect of State-level class on facet of consideration of others' perspectives

```
summary(state.persp)
```

```

## Linear mixed model fit by maximum likelihood t-tests use Satterthwaite
## approximations to degrees of freedom [lmerMod]
## Formula: persp ~ stateclass + (1 | State)
## Data: mrbclean
##
##      AIC      BIC   logLik deviance df.resid
##  4618.4   4641.1 -2305.2  4610.4    2141
##
## Scaled residuals:
##      Min       1Q   Median       3Q      Max
## -2.44666 -0.65678  0.03937  0.72921  2.30582
##
## Random effects:
## Groups   Name      Variance Std.Dev.
## State    (Intercept) 0.0000   0.0000
## Residual                0.5023   0.7087
## Number of obs: 2145, groups: State, 49
##
## Fixed effects:
##              Estimate      Std. Error      df t value
## (Intercept)  0.000000001552  0.015303078107 2145.000000000000  0.000
## stateclass  -0.168248707663  0.052263074896 2145.000000000000 -3.219
##              Pr(>|t|)
## (Intercept)  1.0000
## stateclass   0.0013 **
## ---
## Signif. codes:  0 '***' 0.001 '**' 0.01 '*' 0.05 '.' 0.1 ' ' 1
##
## Correlation of Fixed Effects:
##              (Intr)
## stateclass  0.000

```

## Effect of State-level class on facet of intellectual humility

```
summary(state.humility)
```

```

## Linear mixed model fit by maximum likelihood t-tests use Satterthwaite
## approximations to degrees of freedom [lmerMod]
## Formula: humility ~ stateclass + (1 | State)
## Data: mrbclean
##
##      AIC      BIC   logLik deviance df.resid
##  5061.6   5084.2  -2526.8   5053.6    2141
##
## Scaled residuals:
##      Min       1Q   Median       3Q      Max
## -2.43287 -0.65792  0.04542  0.66634  2.56234
##
## Random effects:
## Groups   Name      Variance      Std.Dev.
## State    (Intercept) 0.0000000000000004089 0.0000002022
## Residual                    0.6176066824840865666 0.78587955978
## Number of obs: 2145, groups: State, 49
##
## Fixed effects:
##              Estimate      Std. Error      df t value
## (Intercept)  0.00000004218    0.016968456715 2145.000000000000  0.000
## stateclass  -0.185001162441    0.057950676195 2145.000000000000 -3.192
##              Pr(>|t|)
## (Intercept)  1.00000
## stateclass   0.00143 **
## ---
## Signif. codes:  0 '***' 0.001 '**' 0.01 '*' 0.05 '.' 0.1 ' ' 1
##
## Correlation of Fixed Effects:
##              (Intr)
## stateclass  0.000

```

## Effect of State-level class on facet of compromise/search for resolution

```
summary(state.comprres)
```

```

## Linear mixed model fit by maximum likelihood t-tests use Satterthwaite
## approximations to degrees of freedom [lmerMod]
## Formula: comprres ~ stateclass + (1 | State)
## Data: mrbclean
##
##      AIC      BIC   logLik deviance df.resid
##  5308.7   5331.4  -2650.3   5300.7    2141
##
## Scaled residuals:
##      Min       1Q   Median       3Q      Max
## -2.60103 -0.63454  0.06871  0.72993  2.18902
##
## Random effects:
## Groups   Name                Variance Std.Dev.
## State    (Intercept)  0.000    0.0000
## Residual                    0.693    0.8325
## Number of obs: 2145, groups: State, 49
##
## Fixed effects:
##              Estimate            Std. Error            df t value
## (Intercept)  0.00000002426    0.017974586550  2145.000000000000    0.000
## stateclass  -0.185653563396    0.061386810974  2145.000000000000   -3.024
##              Pr(>|t|)
## (Intercept)  1.00000
## stateclass  0.00252 **
## ---
## Signif. codes:  0 '***' 0.001 '**' 0.01 '*' 0.05 '.' 0.1 ' ' 1
##
## Correlation of Fixed Effects:
##              (Intr)
## stateclass  0.000

```

## Effect of State-level class on facet of outsider viewpoint

```
summary(state.outsider)
```

```

## Linear mixed model fit by maximum likelihood t-tests use Satterthwaite
## approximations to degrees of freedom [lmerMod]
## Formula: outsider ~ stateclass + (1 | State)
## Data: mrbclean
##
##      AIC      BIC   logLik deviance df.resid
## 6134.4  6157.1 -3063.2  6126.4    2141
##
## Scaled residuals:
##      Min       1Q   Median       3Q      Max
## -1.78185 -0.75592  0.04919  0.78204  1.99586
##
## Random effects:
## Groups   Name      Variance Std.Dev.
## State    (Intercept) 0.000    0.000
## Residual                1.018    1.009
## Number of obs: 2145, groups: State, 49
##
## Fixed effects:
##              Estimate      Std. Error      df t value
## (Intercept)  0.0000000398  0.0217896044 2145.0000000000    0.00
## stateclass  -0.1838421134  0.0744158605 2145.0000000000   -2.47
##              Pr(>|t|)
## (Intercept)  1.0000
## stateclass  0.0136 *
## ---
## Signif. codes:  0 '***' 0.001 '**' 0.01 '*' 0.05 '.' 0.1 ' ' 1
##
## Correlation of Fixed Effects:
##              (Intr)
## stateclass  0.000

```

=>results indicate that for each facet of wise reasoning, state-level class is associated with shifts in wise reasoning  
#replicate the results using regional (rather than state-specific) nesting, with random slope for each State

```

Region.wow<-lmer(wow ~ stateclass+(1+stateclass|Region), mrbclean, REML=F)
Region.wow1<-lmer(wow ~ stateclass+(1|Region), mrbclean, REML=F)

```

## effects of state-class nested in regions, allowing for random intercept of state-level class

```
summary(Region.wow1)
```

```

## Linear mixed model fit by maximum likelihood t-tests use Satterthwaite
## approximations to degrees of freedom [lmerMod]
## Formula: wow ~ stateclass + (1 | Region)
## Data: mrbclean
##
##      AIC      BIC   logLik deviance df.resid
## 3981.0   4003.7 -1986.5  3973.0    2141
##
## Scaled residuals:
##      Min       1Q   Median       3Q      Max
## -2.71213 -0.63822  0.04342  0.68874  2.46352
##
## Random effects:
## Groups   Name                Variance      Std.Dev.
## Region   (Intercept) 0.00000000000000222 0.000000149
## Residual                   0.373195271103937964 0.6108971035
## Number of obs: 2145, groups: Region, 8
##
## Fixed effects:
##              Estimate      Std. Error      df t value
## (Intercept)  0.00000001939  0.013190292240 2145.000000000000  0.000
## stateclass  -0.161423754101  0.045047488250 2145.000000000000 -3.583
##              Pr(>|t|)
## (Intercept) 1.000000
## stateclass  0.000347 ***
## ---
## Signif. codes:  0 '***' 0.001 '**' 0.01 '*' 0.05 '.' 0.1 ' ' 1
##
## Correlation of Fixed Effects:
##              (Intr)
## stateclass  0.000

```

effects of state-class nested in regions,  
allowing for random intercept+slope of state-  
level class

```
summary(Region.wow)
```

```

## Linear mixed model fit by maximum likelihood t-tests use Satterthwaite
## approximations to degrees of freedom [lmerMod]
## Formula: wow ~ stateclass + (1 + stateclass | Region)
## Data: mrbclean
##
##      AIC      BIC   logLik deviance df.resid
## 3985.0   4019.0 -1986.5  3973.0    2139
##
## Scaled residuals:
##      Min       1Q   Median       3Q      Max
## -2.71213 -0.63822  0.04342  0.68874  2.46352
##
## Random effects:
## Groups   Name                Variance          Std.Dev.        Corr
## Region   (Intercept) 0.000000000000000000 0.000000000000
##          stateclass 0.00000000000000413 0.000000006427   NaN
## Residual                    0.373195271103938519541 0.6108971035321
## Number of obs: 2145, groups: Region, 8
##
## Fixed effects:
##              Estimate          Std. Error          df t value
## (Intercept)  0.00000001939    0.013190292240 2145.000000000000  0.000
## stateclass  -0.161423754101    0.045047488250 2145.000000000000 -3.583
##              Pr(>|t|)
## (Intercept) 1.000000
## stateclass  0.000347 ***
## ---
## Signif. codes:  0 '***' 0.001 '**' 0.01 '*' 0.05 '.' 0.1 ' ' 1
##
## Correlation of Fixed Effects:
##              (Intr)
## stateclass  0.000

```

## model fit comparison of random slope+ intercept vs. random intercept models

```
anova(Region.wow1,Region.wow)
```

```

## Data: mrbclean
## Models:
## object: wow ~ stateclass + (1 | Region)
## ..1: wow ~ stateclass + (1 + stateclass | Region)
##      Df  AIC    BIC logLik deviance Chisq Chi Df Pr(>Chisq)
## object  4 3981 4003.7 -1986.5    3973
## ..1    6 3985 4019.0 -1986.5    3973    0    2    1

```

no significant increment when adding a random slope to the region-specific analyses. it appears that the negative effect of state-level status on wise reasoning remains consistent when nesting state-specific scores within regions

# control for population estimates

```
summary(lmer(wow ~ stateclass+scale(Population)+(1|State), mrbclean, REML=FALSE))
```

```
## Linear mixed model fit by maximum likelihood t-tests use Satterthwaite
## approximations to degrees of freedom [lmerMod]
## Formula: wow ~ stateclass + scale(Population) + (1 | State)
## Data: mrbclean
##
##      AIC      BIC   logLik deviance df.resid
## 3983.0   4011.4 -1986.5  3973.0    2140
##
## Scaled residuals:
##      Min       1Q   Median       3Q      Max
## -2.71444 -0.63978  0.04257  0.68927  2.46234
##
## Random effects:
## Groups   Name      Variance Std.Dev.
## State    (Intercept) 0.0000   0.0000
## Residual                0.3732   0.6109
## Number of obs: 2145, groups: State, 49
##
## Fixed effects:
##              Estimate      Std. Error      df
## (Intercept)    0.000000001938    0.013190271097 2145.000000000000
## stateclass    -0.161217736049    0.045115871277 2145.000000000000
## scale(Population)  0.001095724864    0.013213395783 2145.000000000000
##              t value Pr(>|t|)
## (Intercept)     0.000  1.00000
## stateclass     -3.573  0.00036 ***
## scale(Population)  0.083  0.93392
## ---
## Signif. codes:  0 '***' 0.001 '**' 0.01 '*' 0.05 '.' 0.1 ' ' 1
##
## Correlation of Fixed Effects:
##              (Intr) sttcls
## stateclass  0.000
## scal(Ppltn) 0.000  0.055
```

# control for urbanization estimates

```
summary(lmer(wow ~ stateclass+scale(urbcentr.per)+(1|State), mrbclean, REML=FALSE))
```



```

## Linear mixed model fit by maximum likelihood t-tests use Satterthwaite
## approximations to degrees of freedom [lmerMod]
## Formula: wow ~ stateclass + scale(urbcentr.per) + (1 | State)
## Data: mrbclean
##
##      AIC      BIC   logLik deviance df.resid
## 3982.6  4010.9 -1986.3  3972.6    2140
##
## Scaled residuals:
##      Min       1Q   Median       3Q      Max
## -2.71574 -0.63238  0.04537  0.69123  2.47221
##
## Random effects:
## Groups   Name      Variance Std.Dev.
## State    (Intercept) 0.0000   0.0000
## Residual                0.3731   0.6108
## Number of obs: 2145, groups: State, 49
##
## Fixed effects:
##              Estimate      Std. Error      df
## (Intercept)    0.00000001936    0.013188917970 2145.000000000000
## stateclass    -0.160890479853    0.045049855891 2145.000000000000
## scale(urbcentr.per)  0.008821650991    0.013194061403 2145.000000000000
##              t value Pr(>|t|)
## (Intercept)    0.000 1.000000
## stateclass    -3.571 0.000363 ***
## scale(urbcentr.per)  0.669 0.503818
## ---
## Signif. codes:  0 '***' 0.001 '**' 0.01 '*' 0.05 '.' 0.1 ' ' 1
##
## Correlation of Fixed Effects:
##              (Intr) sttcls
## stateclass  0.000
## scl(rbcnt.) 0.000  0.018

```

## control for inequality estimates

```
summary(lmer(wow ~ stateclass+scale(gini1415)+(1|State), mrbclean, REML=FALSE))
```

```

## Linear mixed model fit by maximum likelihood t-tests use Satterthwaite
## approximations to degrees of freedom [lmerMod]
## Formula: wow ~ stateclass + scale(gini1415) + (1 | State)
## Data: mrbclean
##
##      AIC      BIC   logLik deviance df.resid
## 3983.0   4011.3 -1986.5  3973.0    2140
##
## Scaled residuals:
##      Min       1Q   Median       3Q      Max
## -2.71501 -0.63948  0.04331  0.69137  2.45327
##
## Random effects:
## Groups   Name      Variance Std.Dev.
## State    (Intercept) 0.0000   0.0000
## Residual                0.3732   0.6109
## Number of obs: 2145, groups: State, 49
##
## Fixed effects:
##              Estimate      Std. Error      df
## (Intercept)    0.00000001949    0.013190135478 2145.000000000000
## stateclass    -0.163083040191    0.045642389380 2145.000000000000
## scale(gini1415) 0.003018414547    0.013367600765 2145.000000000000
##              t value Pr(>|t|)
## (Intercept)      0.000 1.000000
## stateclass     -3.573 0.000361 ***
## scale(gini1415)  0.226 0.821378
## ---
## Signif. codes:  0 '***' 0.001 '**' 0.01 '*' 0.05 '.' 0.1 ' ' 1
##
## Correlation of Fixed Effects:
##              (Intr) sttcls
## stateclass    0.000
## scl(gn1415)  0.000 -0.161

```

## no interation of state-class and inequality

```

summary(lmer(wow ~ stateclass+scale(gini1415)+stateclass*scale(gini1415)+
            (1|State), mrbclean, REML=FALSE))

```

```

## Linear mixed model fit by maximum likelihood t-tests use Satterthwaite
## approximations to degrees of freedom [lmerMod]
## Formula:
## wow ~ stateclass + scale(gini1415) + stateclass * scale(gini1415) +
## (1 | State)
## Data: mrbclean
##
##      AIC      BIC   logLik deviance df.resid
## 3984.3  4018.4 -1986.2  3972.3    2139
##
## Scaled residuals:
##      Min       1Q   Median       3Q      Max
## -2.70827 -0.63567  0.04294  0.68871  2.45393
##
## Random effects:
## Groups   Name      Variance Std.Dev.
## State    (Intercept) 0.0000   0.0000
## Residual                0.3731   0.6108
## Number of obs: 2145, groups: State, 49
##
## Fixed effects:
##              Estimate Std. Error      df t value
## (Intercept)   -0.0012696   0.0132847 2145.0000000  -0.096
## stateclass    -0.1680961   0.0460698 2145.0000000  -3.649
## scale(gini1415) -0.0005948   0.0141182 2145.0000000  -0.042
## stateclass:scale(gini1415)  0.0269367   0.0339044 2145.0000000   0.794
##
##              Pr(>|t|)
## (Intercept)    0.92387
## stateclass     0.00027 ***
## scale(gini1415)  0.96640
## stateclass:scale(gini1415)  0.42700
## ---
## Signif. codes:  0 '***' 0.001 '**' 0.01 '*' 0.05 '.' 0.1 ' ' 1
##
## Correlation of Fixed Effects:
##              (Intr) sttcls s(1415)
## stateclass   0.016
## scl(gn1415)  0.039 -0.107
## sttc:(1415) -0.120 -0.137 -0.322

```

## control for social desirability

```
summary(lmer(wow ~ stateclass+BIDRFull+(1|State), mrbclean, REML=FALSE))
```

```

## Linear mixed model fit by maximum likelihood t-tests use Satterthwaite
## approximations to degrees of freedom [lmerMod]
## Formula: wow ~ stateclass + BIDRFull + (1 | State)
## Data: mrbclean
##
##      AIC      BIC   logLik deviance df.resid
## 1099.7   1122.0   -544.9   1089.7     632
##
## Scaled residuals:
##      Min       1Q   Median       3Q      Max
## -3.0266 -0.6859  0.1214  0.6946  2.5314
##
## Random effects:
## Groups Name      Variance      Std.Dev.
## State  (Intercept) 0.000000000000001305 0.00000003612
## Residual          0.323954972160157340 0.56917042453
## Number of obs: 637, groups: State, 48
##
## Fixed effects:
##              Estimate Std. Error      df t value Pr(>|t|)
## (Intercept) -0.005570   0.035762 637.000000  -0.156 0.876287
## stateclass  -0.304006   0.079806 637.000000  -3.809 0.000153 ***
## BIDRFull     0.002049   0.006008 637.000000   0.341 0.733262
## ---
## Signif. codes:  0 '***' 0.001 '**' 0.01 '*' 0.05 '.' 0.1 ' ' 1
##
## Correlation of Fixed Effects:
##              (Intr) sttcls
## stateclass -0.044
## BIDRFull   -0.776  0.070

```

effect of state-status on wise reasoning holds when controlling for SAT scores in the state

```
summary(lmer(wow ~ stateclass+SAT+(1|State), mrbclean, REML=FALSE))
```

```

## Linear mixed model fit by maximum likelihood t-tests use Satterthwaite
## approximations to degrees of freedom [lmerMod]
## Formula: wow ~ stateclass + SAT + (1 | State)
## Data: mrbclean
##
##      AIC      BIC   logLik deviance df.resid
## 3982.9  4011.2 -1986.4  3972.9    2140
##
## Scaled residuals:
##      Min       1Q   Median       3Q      Max
## -2.72221 -0.63495  0.04026  0.69201  2.45716
##
## Random effects:
## Groups   Name      Variance Std.Dev.
## State    (Intercept) 0.0000   0.0000
## Residual                0.3732   0.6109
## Number of obs: 2145, groups: State, 49
##
## Fixed effects:
##              Estimate      Std. Error      df t value Pr(>|t|)
## (Intercept)  0.06330329   0.16012046 2145.00000000    0.395 0.692625
## stateclass  -0.16272792   0.04516564 2145.00000000   -3.603 0.000322 ***
## SAT         -0.00004034   0.00010169 2145.00000000   -0.397 0.691631
## ---
## Signif. codes:  0 '***' 0.001 '**' 0.01 '*' 0.05 '.' 0.1 ' ' 1
##
## Correlation of Fixed Effects:
##              (Intr) sttcls
## stateclass -0.073
## SAT        -0.997  0.073

```

## EXAMINE INDIVIDUAL DIFFERENCES IN SOCIAL CLASS EFFECTS - same N as in the State-/regional analyses

```
Pclass<-lmer(wow ~ personalclass+(1|State), mrbclean, REML=FALSE)
```

effect of individual class when controlling for nesting of individual scores in states,

as well as individual slopes within states First, intercept only results

```
summary(Pclass)
```

```

## Linear mixed model fit by maximum likelihood t-tests use Satterthwaite
## approximations to degrees of freedom [lmerMod]
## Formula: wow ~ personalclass + (1 | State)
## Data: mrbclean
##
##      AIC      BIC   logLik deviance df.resid
## 3969.8  3992.5 -1980.9  3961.8    2141
##
## Scaled residuals:
##      Min       1Q   Median       3Q      Max
## -2.79170 -0.61873  0.04228  0.70297  2.47202
##
## Random effects:
## Groups   Name      Variance Std.Dev.
## State    (Intercept) 0.0000   0.0000
## Residual                0.3713   0.6093
## Number of obs: 2145, groups: State, 49
##
## Fixed effects:
##              Estimate      Std. Error      df
## (Intercept)  0.000000004525  0.013155991479 2145.000000000000
## personalclass -0.219057566367  0.044615118802 2145.000000000000
##              t value    Pr(>|t|)
## (Intercept)    0.00         1
## personalclass -4.91 0.00000098 ***
## ---
## Signif. codes:  0 '***' 0.001 '**' 0.01 '*' 0.05 '.' 0.1 ' ' 1
##
## Correlation of Fixed Effects:
##              (Intr)
## personlclass 0.000

```

```
PclassRAND<-lmer(wow ~ personalclass+(1+personalclass|State), mrbclean, REML=FALSE)
```

replicate results with a random slope of individual-level class

```
summary(PclassRAND)
```

```

## Linear mixed model fit by maximum likelihood t-tests use Satterthwaite
## approximations to degrees of freedom [lmerMod]
## Formula: wow ~ personalclass + (1 + personalclass | State)
## Data: mrbclean
##
##      AIC      BIC   logLik deviance df.resid
## 3973.8  4007.9 -1980.9  3961.8    2139
##
## Scaled residuals:
##      Min       1Q   Median       3Q      Max
## -2.79170 -0.61873  0.04228  0.70297  2.47202
##
## Random effects:
## Groups   Name                Variance      Std.Dev.    Corr
## State    (Intercept)          0.000000000000000 0.000000000
##          personalclass      0.000000000001268 0.0000001126  NaN
## Residual                    0.37125683981170809 0.6093084931
## Number of obs: 2145, groups: State, 49
##
## Fixed effects:
##              Estimate      Std. Error      df
## (Intercept)  0.00000004525  0.013155991479 2145.00000000000
## personalclass -0.219057566367  0.044615118802 2145.00000000000
##              t value  Pr(>|t|)
## (Intercept)    0.00      1
## personalclass -4.91 0.00000098 ***
## ---
## Signif. codes:  0 '***' 0.001 '**' 0.01 '*' 0.05 '.' 0.1 ' ' 1
##
## Correlation of Fixed Effects:
##              (Intr)
## personalclass 0.000

```

no sig effects of the random slope of individual-level class above and beyond simple slope model

```
anova(Pclass,PclassRAND)
```

```

## Data: mrbclean
## Models:
## object: wow ~ personalclass + (1 | State)
## ..1: wow ~ personalclass + (1 + personalclass | State)
##      Df    AIC    BIC  logLik deviance Chisq Chi Df Pr(>Chisq)
## object  4 3969.8 3992.5 -1980.9  3961.8
## ..1    6 3973.8 4007.9 -1980.9  3961.8    0    2    1

```

## effect of individual-level class on recognition of change

```
summary(lmer(change ~ personalclass+(1|State), mrbclean, REML=FALSE))
```

```

## Linear mixed model fit by maximum likelihood t-tests use Satterthwaite
## approximations to degrees of freedom [lmerMod]
## Formula: change ~ personalclass + (1 | State)
## Data: mrbclean
##
##      AIC      BIC   logLik deviance df.resid
##  5216.1   5238.8  -2604.0   5208.1    2141
##
## Scaled residuals:
##      Min       1Q   Median       3Q      Max
## -2.79898 -0.63753  0.07011  0.71324  2.23807
##
## Random effects:
## Groups   Name            Variance Std.Dev.
## State    (Intercept)  0.0000   0.0000
## Residual                    0.6637   0.8147
## Number of obs: 2145, groups: State, 49
##
## Fixed effects:
##              Estimate      Std. Error      df
## (Intercept)  -0.00000003805    0.017590742429  2145.000000000000
## personalclass -0.312017496135    0.059654421677  2145.000000000000
##              t value    Pr(>|t|)
## (Intercept)      0.00          1
## personalclass  -5.23 0.000000186 ***
## ---
## Signif. codes:  0 '***' 0.001 '**' 0.01 '*' 0.05 '.' 0.1 ' ' 1
##
## Correlation of Fixed Effects:
##              (Intr)
## personlclass 0.000

```

## effect of individual-level class on intellectual humility

```
summary(lmer(humility ~ personalclass+(1|State), mrbclean, REML=FALSE))
```



```

## Linear mixed model fit by maximum likelihood t-tests use Satterthwaite
## approximations to degrees of freedom [lmerMod]
## Formula: humility ~ personalclass + (1 | State)
## Data: mrbclean
##
##      AIC      BIC   logLik deviance df.resid
## 5055.7  5078.4 -2523.8  5047.7    2141
##
## Scaled residuals:
##      Min       1Q   Median       3Q      Max
## -2.49194 -0.64088  0.03387  0.67837  2.53951
##
## Random effects:
## Groups Name          Variance          Std.Dev.
## State  (Intercept)  0.000000000000005326  0.0000002308
## Residual                0.6159168885965332629  0.78480372616
## Number of obs: 2145, groups: State, 49
##
## Fixed effects:
##              Estimate          Std. Error          df
## (Intercept)    0.00000006852    0.016945227665  2145.000000000000
## personalclass -0.230608665814    0.057465326470  2145.000000000000
##              t value Pr(>|t|)
## (Intercept)    0.000      1
## personalclass -4.013 0.000062 ***
## ---
## Signif. codes:  0 '***' 0.001 '**' 0.01 '*' 0.05 '.' 0.1 ' ' 1
##
## Correlation of Fixed Effects:
##              (Intr)
## personlclass 0.000

```

## effect of individual-level class on consideration of others' perspectives

```
summary(lmer(persp ~ personalclass+(1|State), mrbclean, REML=FALSE))
```

```

## Linear mixed model fit by maximum likelihood t-tests use Satterthwaite
## approximations to degrees of freedom [lmerMod]
## Formula: persp ~ personalclass + (1 | State)
## Data: mrbclean
##
##      AIC      BIC   logLik deviance df.resid
##  4609.7   4632.4 -2300.8  4601.7    2141
##
## Scaled residuals:
##      Min       1Q   Median       3Q      Max
## -2.50030 -0.64883  0.04575  0.72602  2.31645
##
## Random effects:
## Groups   Name      Variance Std.Dev.
## State    (Intercept) 0.0000   0.0000
## Residual                0.5003   0.7073
## Number of obs: 2145, groups: State, 49
##
## Fixed effects:
##              Estimate      Std. Error      df t value
## (Intercept)    0.0000000422    0.01527197688 2145.00000000000  0.000
## personalclass -0.22664886991    0.05179093221 2145.00000000000 -4.376
##              Pr(>|t|)
## (Intercept)           1
## personalclass 0.0000127 ***
## ---
## Signif. codes:  0 '***' 0.001 '**' 0.01 '*' 0.05 '.' 0.1 ' ' 1
##
## Correlation of Fixed Effects:
##              (Intr)
## personlclss 0.000

```

## effect of individual-level class on compromise/search for resolution

```
summary(lmer(compres ~ personalclass+(1|State), mrbclean, REML=FALSE))
```

```

## Linear mixed model fit by maximum likelihood t-tests use Satterthwaite
## approximations to degrees of freedom [lmerMod]
## Formula: comprses ~ personalclass + (1 | State)
## Data: mrbclean
##
##      AIC      BIC   logLik deviance df.resid
## 5299.4  5322.1 -2645.7  5291.4    2141
##
## Scaled residuals:
##      Min       1Q   Median       3Q      Max
## -2.6618 -0.6305  0.0732  0.7371  2.2042
##
## Random effects:
## Groups Name      Variance      Std.Dev.
## State  (Intercept) 0.00000000000000117 0.0000000342
## Residual          0.69003559848631668 0.8306838138
## Number of obs: 2145, groups: State, 49
##
## Fixed effects:
##              Estimate      Std. Error      df
## (Intercept)  0.00000005551  0.017935855645 2145.000000000000
## personalclass -0.261333997919  0.060824783269 2145.000000000000
##              t value Pr(>|t|)
## (Intercept)    0.000      1
## personalclass -4.297 0.0000181 ***
## ---
## Signif. codes:  0 '***' 0.001 '**' 0.01 '*' 0.05 '.' 0.1 ' ' 1
##
## Correlation of Fixed Effects:
##              (Intr)
## personlclass 0.000

```

## effect of individual-level class on taking an outsider viewpoint

```
summary(lmer(outsider ~ personalclass+(1|State), mrbclean, REML=FALSE))
```

```

## Linear mixed model fit by maximum likelihood t-tests use Satterthwaite
## approximations to degrees of freedom [lmerMod]
## Formula: outsider ~ personalclass + (1 | State)
## Data: mrbclean
##
##      AIC      BIC   logLik deviance df.resid
##  6132.2   6154.9  -3062.1   6124.2    2141
##
## Scaled residuals:
##      Min       1Q   Median       3Q      Max
## -1.79591 -0.74029  0.04463  0.78132  1.98882
##
## Random effects:
## Groups Name      Variance      Std.Dev.
## State  (Intercept) 0.0000000000000008528 0.000000292
## Residual          1.0174007802369304798 1.0086628675
## Number of obs: 2145, groups: State, 49
##
## Fixed effects:
##              Estimate      Std. Error      df t value
## (Intercept)    0.0000004215    0.02177872168 2145.00000000000  0.000
## personalclass -0.21218326987    0.07385686261 2145.00000000000 -2.873
##              Pr(>|t|)
## (Intercept)    1.00000
## personalclass  0.00411 **
## ---
## Signif. codes:  0 '***' 0.001 '**' 0.01 '*' 0.05 '.' 0.1 ' ' 1
##
## Correlation of Fixed Effects:
##              (Intr)
## personlclass 0.000

```

examine unique contribution of state above and beyond individual-level effects of class, as well as interaction

both state-level and individual class independently contribute to wise reasoning, individual effect is stronger

no interaction between state and individual levels

```
summary(lmer(wow ~ personalclassSTATEAV*personalclassDIFFFROMSTATEAV+
            (1|State), mrbclean, REML=FALSE))
```

```
## Linear mixed model fit by maximum likelihood t-tests use Satterthwaite
## approximations to degrees of freedom [lmerMod]
## Formula: wow ~ personalclassSTATEAV * personalclassDIFFFROMSTATEAV + (1 |
## State)
## Data: mrbclean
##
##      AIC      BIC   logLik deviance df.resid
## 3973.0  4007.0 -1980.5  3961.0    2139
##
## Scaled residuals:
##      Min       1Q   Median       3Q      Max
## -2.79625 -0.61162  0.03904  0.70281  2.47166
##
## Random effects:
## Groups   Name                Variance      Std.Dev.
## State    (Intercept)  0.00000000000000003311  0.0000000182
## Residual                    0.3711132740177283673  0.6091906713
## Number of obs: 2145, groups: State, 49
##
## Fixed effects:
##
##              Estimate Std. Error
## (Intercept)    -0.003348    0.013659
## personalclassSTATEAV    -0.259168    0.125385
## personalclassDIFFFROMSTATEAV    -0.220259    0.044640
## personalclassSTATEAV:personalclassDIFFFROMSTATEAV    -0.257445    0.283093
##
##              df t value
## (Intercept)    2145.000000    -0.245
## personalclassSTATEAV    2145.000000    -2.067
## personalclassDIFFFROMSTATEAV    2145.000000    -4.934
## personalclassSTATEAV:personalclassDIFFFROMSTATEAV    2145.000000    -0.909
##
##              Pr(>|t|)
## (Intercept)    0.8064
## personalclassSTATEAV    0.0389 *
## personalclassDIFFFROMSTATEAV    0.000000867 ***
## personalclassSTATEAV:personalclassDIFFFROMSTATEAV    0.3632
## ---
## Signif. codes:  0 '***' 0.001 '**' 0.01 '*' 0.05 '.' 0.1 ' ' 1
##
## Correlation of Fixed Effects:
##              (Intr) prSTATEAV pDIFFF
## prsnSTATEAV  0.081
## pDIFFFROMST  0.008  0.344
## pSTATEAV:DI  0.270  0.300  0.031
```

```
#####
```

# attempt to replicate with separate income and education

```
#####
```

alone, these variables do not predict much however, both effects appear to go in the same direction marginally sig effect for recognition of change.

```
summary(lmer(wow ~ Edu+Income+(1|State), mrbclean, REML=FALSE))
```

```
## Linear mixed model fit by maximum likelihood t-tests use Satterthwaite
## approximations to degrees of freedom [lmerMod]
## Formula: wow ~ Edu + Income + (1 | State)
## Data: mrbclean
##
##      AIC      BIC   logLik deviance df.resid
## 3248.5  3276.0 -1619.2  3238.5    1790
##
## Scaled residuals:
##      Min       1Q   Median       3Q      Max
## -2.85450 -0.61841  0.05358  0.68287  2.44493
##
## Random effects:
## Groups   Name            Variance Std.Dev.
## State    (Intercept)  0.0000   0.0000
## Residual                   0.3557   0.5964
## Number of obs: 1795, groups: State, 48
##
## Fixed effects:
##              Estimate Std. Error    df t value Pr(>|t|)
## (Intercept)  0.114679   0.050725 1795.000000  2.261  0.0239 *
## Edu          -0.007100   0.011827 1795.000000 -0.600  0.5484
## Income       -0.012437   0.007834 1795.000000 -1.588  0.1125
## ---
## Signif. codes:  0 '***' 0.001 '**' 0.01 '*' 0.05 '.' 0.1 ' ' 1
##
## Correlation of Fixed Effects:
##      (Intr) Edu
## Edu    -0.764
## Income -0.393 -0.228
```

```
summary(lmer(wow ~ Edu+(1|State), mrbclean, REML=FALSE))
```

```

## Linear mixed model fit by maximum likelihood t-tests use Satterthwaite
## approximations to degrees of freedom [lmerMod]
## Formula: wow ~ Edu + (1 | State)
## Data: mrbclean
##
##      AIC      BIC   logLik deviance df.resid
## 3251.8  3273.8 -1621.9  3243.8    1793
##
## Scaled residuals:
##      Min       1Q   Median       3Q      Max
## -2.8291 -0.6192  0.0513  0.6827  2.4343
##
## Random effects:
## Groups   Name      Variance Std.Dev.
## State    (Intercept) 0.000    0.0000
## Residual                0.356    0.5967
## Number of obs: 1797, groups: State, 48
##
## Fixed effects:
##              Estimate Std. Error      df t value Pr(>|t|)
## (Intercept)   0.08314   0.04666 1797.00000   1.782   0.075 .
## Edu          -0.01131   0.01152 1797.00000  -0.982   0.326
## ---
## Signif. codes:  0 '***' 0.001 '**' 0.01 '*' 0.05 '.' 0.1 ' ' 1
##
## Correlation of Fixed Effects:
##      (Intr)
## Edu -0.953

```

```
summary(lmer(wow ~ Income+(1|State), mrbclean, REML=FALSE))
```

```

## Linear mixed model fit by maximum likelihood t-tests use Satterthwaite
## approximations to degrees of freedom [lmerMod]
## Formula: wow ~ Income + (1 | State)
## Data: mrbclean
##
##      AIC      BIC   logLik deviance df.resid
## 3250.2   3272.2 -1621.1  3242.2    1795
##
## Scaled residuals:
##      Min       1Q   Median       3Q      Max
## -2.86439 -0.61062  0.04539  0.68065  2.46190
##
## Random effects:
## Groups   Name      Variance Std.Dev.
## State    (Intercept) 0.000    0.0000
## Residual                0.355    0.5958
## Number of obs: 1799, groups: State, 48
##
## Fixed effects:
##              Estimate Std. Error      df t value Pr(>|t|)
## (Intercept)  0.091659   0.032663 1799.000000   2.806 0.00507 **
## Income      -0.013597   0.007612 1799.000000  -1.786 0.07424 .
## ---
## Signif. codes:  0 '***' 0.001 '**' 0.01 '*' 0.05 '.' 0.1 ' ' 1
##
## Correlation of Fixed Effects:
##      (Intr)
## Income -0.903

```

```
summary(lmer(change ~ Edu+Income+(1|State), mrbclean, REML=FALSE))
```



```

## Linear mixed model fit by maximum likelihood t-tests use Satterthwaite
## approximations to degrees of freedom [lmerMod]
## Formula: change ~ Edu + Income + (1 | State)
## Data: mrbclean
##
##      AIC      BIC   logLik deviance df.resid
##  4280.8   4308.3  -2135.4   4270.8    1790
##
## Scaled residuals:
##      Min       1Q   Median       3Q      Max
## -2.88117 -0.65074  0.05141  0.70707  2.17028
##
## Random effects:
## Groups   Name      Variance Std.Dev.
## State    (Intercept) 0.0000   0.0000
## Residual                0.6322   0.7951
## Number of obs: 1795, groups: State, 48
##
## Fixed effects:
##              Estimate Std. Error      df t value Pr(>|t|)
## (Intercept)   0.22058   0.06762 1795.00000   3.262  0.00113 **
## Edu           -0.02467   0.01577 1795.00000  -1.565  0.11784
## Income        -0.01825   0.01044 1795.00000  -1.748  0.08071 .
## ---
## Signif. codes:  0 '***' 0.001 '**' 0.01 '*' 0.05 '.' 0.1 ' ' 1
##
## Correlation of Fixed Effects:
##      (Intr) Edu
## Edu      -0.764
## Income  -0.393 -0.228

```

```
summary(lmer(persp ~ Edu+Income+(1|State), mrbclean, REML=FALSE))
```

```

## Linear mixed model fit by maximum likelihood t-tests use Satterthwaite
## approximations to degrees of freedom [lmerMod]
## Formula: persp ~ Edu + Income + (1 | State)
## Data: mrbclean
##
##      AIC      BIC   logLik deviance df.resid
##  3785.9   3813.3 -1887.9   3775.9    1790
##
## Scaled residuals:
##      Min       1Q   Median       3Q      Max
## -2.56563 -0.65443  0.03585  0.72316  2.25110
##
## Random effects:
## Groups   Name      Variance Std.Dev.
## State    (Intercept) 0.0000   0.0000
## Residual                0.4798   0.6927
## Number of obs: 1795, groups: State, 48
##
## Fixed effects:
##              Estimate Std. Error      df t value Pr(>|t|)
## (Intercept)   0.117819   0.058915 1795.000000    2.000   0.0457 *
## Edu           -0.005143   0.013737 1795.000000   -0.374   0.7081
## Income        -0.012097   0.009099 1795.000000   -1.329   0.1839
## ---
## Signif. codes:  0 '***' 0.001 '**' 0.01 '*' 0.05 '.' 0.1 ' ' 1
##
## Correlation of Fixed Effects:
##      (Intr) Edu
## Edu      -0.764
## Income  -0.393 -0.228

```

```
summary(lmer(humility ~ Edu+Income+(1|State), mrbclean, REML=FALSE))
```

```

## Linear mixed model fit by maximum likelihood t-tests use Satterthwaite
## approximations to degrees of freedom [lmerMod]
## Formula: humility ~ Edu + Income + (1 | State)
## Data: mrbclean
##
##      AIC      BIC   logLik deviance df.resid
## 4165.6 4193.0 -2077.8 4155.6 1790
##
## Scaled residuals:
##      Min       1Q   Median       3Q      Max
## -2.5387 -0.6554  0.0192  0.6744  2.5520
##
## Random effects:
## Groups Name          Variance          Std.Dev.
## State (Intercept) 0.0000000000000006785 0.0000002605
## Residual          0.5928641607826439230 0.76997672743
## Number of obs: 1795, groups: State, 48
##
## Fixed effects:
##              Estimate Std. Error      df t value Pr(>|t|)
## (Intercept)  0.07543   0.06549 1795.00000  1.152  0.250
## Edu          0.00406   0.01527 1795.00000  0.266  0.790
## Income      -0.01507   0.01011 1795.00000 -1.490  0.136
##
## Correlation of Fixed Effects:
##      (Intr) Edu
## Edu   -0.764
## Income -0.393 -0.228

```

```
summary(lmer(compres ~ Edu+Income+(1|State), mrbclean, REML=FALSE))
```

```

## Linear mixed model fit by maximum likelihood t-tests use Satterthwaite
## approximations to degrees of freedom [lmerMod]
## Formula: comprres ~ Edu + Income + (1 | State)
## Data: mrbclean
##
##      AIC      BIC   logLik deviance df.resid
##  4383.8   4411.2  -2186.9   4373.8    1790
##
## Scaled residuals:
##      Min       1Q   Median       3Q      Max
## -2.70274 -0.62718  0.07224  0.72593  2.13939
##
## Random effects:
## Groups   Name      Variance Std.Dev.
## State    (Intercept) 0.0000   0.0000
## Residual                0.6695   0.8182
## Number of obs: 1795, groups: State, 48
##
## Fixed effects:
##              Estimate Std. Error      df t value Pr(>|t|)
## (Intercept)   0.132115   0.069592 1795.000000    1.898   0.0578 .
## Edu           -0.007751   0.016226 1795.000000   -0.478   0.6329
## Income        -0.012936   0.010748 1795.000000   -1.204   0.2289
## ---
## Signif. codes:  0 '***' 0.001 '**' 0.01 '*' 0.05 '.' 0.1 ' ' 1
##
## Correlation of Fixed Effects:
##      (Intr) Edu
## Edu      -0.764
## Income  -0.393 -0.228

```

```
summary(lmer(outsider ~ Edu+Income+(1|State), mrbclean, REML=FALSE))
```

```

## Linear mixed model fit by maximum likelihood t-tests use Satterthwaite
## approximations to degrees of freedom [lmerMod]
## Formula: outsider ~ Edu + Income + (1 | State)
## Data: mrbclean
##
##      AIC      BIC   logLik deviance df.resid
## 5145.4 5172.8 -2567.7 5135.4 1790
##
## Scaled residuals:
##      Min       1Q   Median       3Q      Max
## -1.7582 -0.7599  0.0453  0.7835  1.9282
##
## Random effects:
## Groups Name Variance Std.Dev.
## State (Intercept) 0.000 0.000
## Residual 1.023 1.012
## Number of obs: 1795, groups: State, 48
##
## Fixed effects:
##      Estimate Std. Error      df t value Pr(>|t|)
## (Intercept) 0.095137 0.086038 1795.000000 1.106 0.269
## Edu -0.014927 0.020061 1795.000000 -0.744 0.457
## Income -0.008558 0.013288 1795.000000 -0.644 0.520
##
## Correlation of Fixed Effects:
##      (Intr) Edu
## Edu -0.764
## Income -0.393 -0.228

```

## control for demographics

effect of individual-level social class holds when controlling for gender and age

```
summary(lmer(wow ~ personalclass+scale(Age)+as.factor(Gender)+(1|State), mrbclean, REML=FALSE))
```

```

## Linear mixed model fit by maximum likelihood t-tests use Satterthwaite
## approximations to degrees of freedom [lmerMod]
## Formula:
## wow ~ personalclass + scale(Age) + as.factor(Gender) + (1 | State)
## Data: mrbclean
##
##      AIC      BIC   logLik deviance df.resid
## 3969.7  4003.7 -1978.9  3957.7    2138
##
## Scaled residuals:
##      Min       1Q   Median       3Q      Max
## -2.82643 -0.61461  0.05291  0.70006  2.49568
##
## Random effects:
## Groups Name          Variance          Std.Dev.
## State  (Intercept)  0.0000000000000008756  0.0000002959
## Residual                0.3708602400922935693  0.60898295550
## Number of obs: 2144, groups: State, 49
##
## Fixed effects:
##              Estimate Std. Error      df t value    Pr(>|t|)
## (Intercept)   -0.025378   0.020651 2144.000000  -1.229    0.219
## personalclass  -0.217693   0.045045 2144.000000  -4.833  0.00000144
## scale(Age)     -0.007187   0.013325 2144.000000  -0.539    0.590
## as.factor(Gender)2  0.042432   0.026856 2144.000000   1.580    0.114
##
## (Intercept)
## personalclass      ***
## scale(Age)
## as.factor(Gender)2
## ---
## Signif. codes:  0 '***' 0.001 '**' 0.01 '*' 0.05 '.' 0.1 ' ' 1
##
## Correlation of Fixed Effects:
##              (Intr) prsnlc scl(A)
## personalclass  0.013
## scale(Age)     0.058 -0.139
## as.fctr(G)2  -0.771 -0.016 -0.076

```

## control for regional differences in income inequality

main effect of person-level class and no interaction

```

summary(lmer(wow ~ scale(personalclass,scale=F)+scale(gini1415,scale=F)+
            scale(personalclass,scale=F)*scale(gini1415,scale=F)+
            (1|State), mrbclean, REML=F))

```

```

## Linear mixed model fit by maximum likelihood t-tests use Satterthwaite
## approximations to degrees of freedom [lmerMod]
## Formula:
## wow ~ scale(personalclass, scale = F) + scale(gini1415, scale = F) +
##       scale(personalclass, scale = F) * scale(gini1415, scale = F) +
##       (1 | State)
## Data: mrbclean
##
##      AIC      BIC   logLik deviance df.resid
## 3973.5  4007.6 -1980.8  3961.5    2139
##
## Scaled residuals:
##      Min       1Q   Median       3Q      Max
## -2.80061 -0.61871  0.04583  0.70274  2.47199
##
## Random effects:
## Groups   Name      Variance Std.Dev.
## State    (Intercept) 0.0000   0.0000
## Residual                0.3712   0.6093
## Number of obs: 2145, groups: State, 49
##
## Fixed effects:
##
##                                     Estimate
## (Intercept)                          0.0005981
## scale(personalclass, scale = F)       -0.2182590
## scale(gini1415, scale = F)            0.1341497
## scale(personalclass, scale = F):scale(gini1415, scale = F) -1.3050357
##                                     Std. Error
## (Intercept)                          0.0132013
## scale(personalclass, scale = F)       0.0448304
## scale(gini1415, scale = F)           0.7589771
## scale(personalclass, scale = F):scale(gini1415, scale = F)  2.4088725
##                                     df
## (Intercept)                        2145.0000000
## scale(personalclass, scale = F)     2145.0000000
## scale(gini1415, scale = F)         2145.0000000
## scale(personalclass, scale = F):scale(gini1415, scale = F) 2145.0000000
##                                     t value
## (Intercept)                          0.045
## scale(personalclass, scale = F)      -4.869
## scale(gini1415, scale = F)           0.177
## scale(personalclass, scale = F):scale(gini1415, scale = F) -0.542
##                                     Pr(>|t|)
## (Intercept)                          0.964
## scale(personalclass, scale = F)     0.00000121 ***
## scale(gini1415, scale = F)           0.860
## scale(personalclass, scale = F):scale(gini1415, scale = F)  0.588
## ---
## Signif. codes:  0 '***' 0.001 '**' 0.01 '*' 0.05 '.' 0.1 ' ' 1
##
## Correlation of Fixed Effects:
##      (Intr) s(,s=F s(1s=F
## scl(pr,s=F)  0.004

```

```
## s(1415,s=F) 0.016 -0.078
## s(,s=F):s=F -0.084 -0.045 -0.188
```

# control for social desirability

first, is there effect of social class on social desirability? Not really

```
summary(lmer(BIDRFull ~ personalclass+(1|State), mrbclean, REML=FALSE))
```

```
## Linear mixed model fit by maximum likelihood t-tests use Satterthwaite
## approximations to degrees of freedom [lmerMod]
## Formula: BIDRFull ~ personalclass + (1 | State)
## Data: mrbclean
##
##      AIC      BIC   logLik deviance df.resid
## 3500.8   3518.7 -1746.4  3492.8     633
##
## Scaled residuals:
##      Min       1Q   Median       3Q      Max
## -1.4010 -0.7259 -0.2525  0.5172  4.0566
##
## Random effects:
## Groups   Name      Variance Std.Dev.
## State    (Intercept) 0.3129  0.5593
## Residual                    13.8350  3.7195
## Number of obs: 637, groups: State, 48
##
## Fixed effects:
##              Estimate Std. Error      df t value      Pr(>|t|)
## (Intercept)    4.6816    0.1811 26.0000  25.847 <0.0000000000000002 ***
## personalclass  0.5508    0.4564 621.2000   1.207      0.228
## ---
## Signif. codes:  0 '***' 0.001 '**' 0.01 '*' 0.05 '.' 0.1 ' ' 1
##
## Correlation of Fixed Effects:
##              (Intr)
## personalclass 0.080
```

next, including social desirability as control variables does not change the relationship between social class and wise reasoning.

```
summary(lmer(wow ~ personalclass+BIDRFull+(1|State), mrbclean, REML=FALSE))
```



```

## Linear mixed model fit by maximum likelihood t-tests use Satterthwaite
## approximations to degrees of freedom [lmerMod]
## Formula: wow ~ personalclass + BIDRFull + (1 | State)
## Data: mrbclean
##
##      AIC      BIC   logLik deviance df.resid
## 1098.5  1120.8  -544.3  1088.5    632
##
## Scaled residuals:
##      Min       1Q   Median       3Q      Max
## -3.1423 -0.6574  0.0796  0.7049  2.3752
##
## Random effects:
## Groups   Name            Variance Std.Dev.
## State    (Intercept)  0.0000   0.0000
## Residual                    0.3233   0.5686
## Number of obs: 637, groups: State, 48
##
## Fixed effects:
##              Estimate Std. Error      df t value Pr(>|t|)
## (Intercept)  -0.023932  0.035828 637.000000  -0.668    0.504
## personalclass -0.272594  0.068641 637.000000  -3.971 0.0000796 ***
## BIDRFull      0.004568  0.005992 637.000000   0.762    0.446
## ---
## Signif. codes:  0 '***' 0.001 '**' 0.01 '*' 0.05 '.' 0.1 ' ' 1
##
## Correlation of Fixed Effects:
##              (Intr) prsnlc
## personlclss  0.087
## BIDRFull     -0.775 -0.039

```

## control for agreeableness, openness, and orientation to others vs. self

(due to possible overlap with some aspects of wise reasoning) both social class and openness explain variance in wise reasoning

```
summary(lmer(wow ~ personalclass+Openness+(1|State), mrbclean, REML=FALSE))
```

```

## Linear mixed model fit by maximum likelihood t-tests use Satterthwaite
## approximations to degrees of freedom [lmerMod]
## Formula: wow ~ personalclass + Openness + (1 | State)
## Data: mrbclean
##
##      AIC      BIC   logLik deviance df.resid
## 1373.1  1396.7  -681.6  1363.1     828
##
## Scaled residuals:
##      Min       1Q   Median       3Q      Max
## -2.95935 -0.63228  0.09931  0.69044  2.75501
##
## Random effects:
## Groups   Name      Variance      Std.Dev.
## State    (Intercept) 0.000000000000001297 0.00000003601
## Residual                0.300743766786798816 0.54840110028
## Number of obs: 833, groups: State, 48
##
## Fixed effects:
##              Estimate Std. Error      df t value    Pr(>|t|)
## (Intercept)   -0.80633    0.15737 833.00000   -5.124 0.000000372 ***
## personalclass -0.25381    0.05813 833.00000   -4.366 0.00014242 ***
## Openness      0.20552    0.03968 833.00000    5.180 0.00000278 ***
## ---
## Signif. codes:  0 '***' 0.001 '**' 0.01 '*' 0.05 '.' 0.1 ' ' 1
##
## Correlation of Fixed Effects:
##              (Intr) prsnlc
## personlclss  0.025
## Openness    -0.993 -0.019

```

both social class and agreeableness explain variance in wise reasoning

```
summary(lmer(wow ~ personalclass+Agreeableness+(1|State), mrbclean, REML=FALSE))
```

```

## Linear mixed model fit by maximum likelihood t-tests use Satterthwaite
## approximations to degrees of freedom [lmerMod]
## Formula: wow ~ personalclass + Agreeableness + (1 | State)
## Data: mrbclean
##
##      AIC      BIC   logLik deviance df.resid
## 1382.8  1406.4  -686.4  1372.8     828
##
## Scaled residuals:
##      Min       1Q   Median       3Q      Max
## -2.99947 -0.65909  0.06785  0.70380  2.92753
##
## Random effects:
## Groups Name          Variance      Std.Dev.
## State  (Intercept) 0.000000000000009557 0.0000003091
## Residual          0.3042471793442670380 0.55158605797
## Number of obs: 833, groups: State, 48
##
## Fixed effects:
##              Estimate Std. Error      df t value Pr(>|t|)
## (Intercept)  -0.46192    0.11456 833.00000  -4.032 0.0000604 ***
## personalclass -0.24576    0.05846 833.00000  -4.204 0.0000291 ***
## Agreeableness  0.12961    0.03150 833.00000   4.115 0.0000426 ***
## ---
## Signif. codes:  0 '***' 0.001 '**' 0.01 '*' 0.05 '.' 0.1 ' ' 1
##
## Correlation of Fixed Effects:
##              (Intr) prsnlc
## personlclss -0.002
## Agreeablncs -0.986  0.010

```

control for individual differences in other-vs. self-focus: recognition on/focus of personal vs. other's emotions effect of social class when controlling for focus on others' emotions

```

summary(lmer(wow ~ personalclass+ EISelfEmotions+EIOthersEmotions
            +(1|State), mrbclean, REML=FALSE))

```

```

## Linear mixed model fit by maximum likelihood t-tests use Satterthwaite
## approximations to degrees of freedom [lmerMod]
## Formula: wow ~ personalclass + EISelfEmotions + EIOthersEmotions + (1 |
## State)
## Data: mrbclean
##
##      AIC      BIC   logLik deviance df.resid
## 1075.5  1102.3  -531.8  1063.5    631
##
## Scaled residuals:
##      Min       1Q   Median       3Q      Max
## -3.2513 -0.6522  0.1307  0.7146  3.1574
##
## Random effects:
## Groups   Name            Variance Std.Dev.
## State    (Intercept)  0.0000   0.0000
## Residual                    0.3109   0.5576
## Number of obs: 637, groups: State, 48
##
## Fixed effects:
##              Estimate Std. Error      df t value  Pr(>|t|)
## (Intercept)   -0.549196   0.120231 637.000000  -4.568 0.00000592 ***
## personalclass  -0.270731   0.067312 637.000000  -4.022 0.00006462 ***
## EISelfEmotions  0.003732   0.021162 637.000000   0.176      0.86
## EIOthersEmotions 0.100883   0.022930 637.000000   4.400 0.00001271 ***
## ---
## Signif. codes:  0 '***' 0.001 '**' 0.01 '*' 0.05 '.' 0.1 ' ' 1
##
## Correlation of Fixed Effects:
##              (Intr) prsnlc EISlfe
## personlclass  0.034
## EISelfEmtns  -0.447 -0.040
## EIOthrsEmtn  -0.556  0.020 -0.477

```

notably, there are no class differences in recognition of/focus on others' emotions

```
summary(lmer(EIOthersEmotions ~ personalclass+(1|State), mrbclean, REML=FALSE))
```

```

## Linear mixed model fit by maximum likelihood t-tests use Satterthwaite
## approximations to degrees of freedom [lmerMod]
## Formula: EIOthersEmotions ~ personalclass + (1 | State)
## Data: mrbclean
##
##      AIC      BIC   logLik deviance df.resid
## 1932.9 1950.7 -962.4 1924.9     633
##
## Scaled residuals:
##      Min       1Q   Median       3Q      Max
## -3.8508 -0.6524  0.0255  0.7071  1.6300
##
## Random effects:
## Groups Name          Variance Std.Dev.
## State  (Intercept) 0.001157 0.03401
## Residual          1.200725 1.09578
## Number of obs: 637, groups: State, 48
##
## Fixed effects:
##              Estimate Std. Error      df t value      Pr(>|t|)
## (Intercept)    5.222813   0.044126 13.600000 118.361 <0.0000000000000002
## personalclass -0.002834   0.132315 577.400000  -0.021      0.983
##
## (Intercept)    ***
## personalclass
## ---
## Signif. codes:  0 '***' 0.001 '**' 0.01 '*' 0.05 '.' 0.1 ' ' 1
##
## Correlation of Fixed Effects:
##              (Intr)
## personlclass 0.090

```

# WITHIN-SITUATIONAL STATUS EFFECTS

BASED ON SAMPLES REPORTING THEIR STATUS IN THE SITUATION

```

#convert status (higher score means higher status of another person)
mrbclean$sitstatus<-mrbclean$status*(-1)
mrbclean$sitstatusOR <- ordered(mrbclean$sitstatus,
                               levels = c(-5,-4,-3,-2,-1),
                               labels = c("Much Less", "Less", "Same/Similar","More","Much More"))

```

first, standardize wise reasoning scores on this sub=sample

```

mrbclean.sit<-subset(mrbclean,sitstatusOR!="NA")
mrbclean.sit$wow<-scale(mrbclean.sit$wow)

```

means and confidence interval of wise reasoning at each status level

```
apa.lway.table(sitstatusOR,wow,mrbclean.sit,show.conf.interval=T)
```

```
##
##
## Descriptive statistics for wow as a function of sitstatusOR.
##
##   sitstatusOR      M      LL      UL      SD
##   Much Less  0.11 -0.14  0.36  1.09
##           Less  0.10 -0.06  0.25  0.89
##   Same/Similar 0.02 -0.09  0.13  0.92
##           More  0.08 -0.08  0.24  0.99
##   Much More -0.43 -0.68 -0.18  1.21
##
## Note. M and SD represent mean and standard deviation, respectively.
## LL and UL indicate the lower and upper limits of the 95% confidence interval
## for the mean, respectively.
## The confidence interval is a plausible range of population means that could
## have caused a sample mean (Cumming, 2014).
```

```
status.Wclass.dv<-lm(wow ~ sitstatus, data=mrbclean.sit)
#greater status (vs. status of the other person in a situation) Linked to Less wise reasoning
summary(status.Wclass.dv)
```

```
##
## Call:
## lm(formula = wow ~ sitstatus, data = mrbclean.sit)
##
## Residuals:
##      Min       1Q   Median       3Q      Max
## -2.69384 -0.56689  0.05205  0.63026  2.65034
##
## Coefficients:
##              Estimate Std. Error t value Pr(>|t|)
## (Intercept) -0.29817    0.10200  -2.923  0.00357 **
## sitstatus   -0.10143    0.03236  -3.134  0.00179 **
## ---
## Signif. codes:  0 '***' 0.001 '**' 0.01 '*' 0.05 '.' 0.1 ' ' 1
##
## Residual standard error: 0.994 on 728 degrees of freedom
## Multiple R-squared:  0.01331,    Adjusted R-squared:  0.01196
## F-statistic: 9.822 on 1 and 728 DF,  p-value: 0.001794
```

```
apa.reg.table(status.Wclass.dv)
```

```
## Warning: package 'bindrcpp' was built under R version 3.3.3
```

```

##
##
## Regression results using wow as the criterion
##
##
## Predictor      b      b_95%_CI  beta   beta_95%_CI sr2 sr2_95%_CI
## (Intercept) -0.30** [-0.50, -0.10]
## sitstatus -0.10** [-0.16, -0.04] -0.12 [-0.19, -0.04] .01 [.00, .03]
##
##
##
##      r      Fit
##
## -.12**
##      R2 = .013**
##      95% CI[.00,.03]
##
##
## Note. * indicates p < .05; ** indicates p < .01.
## A significant b-weight indicates the beta-weight and semi-partial correlation are also significant.
## b represents unstandardized regression weights; beta indicates the standardized regression weights;
## sr2 represents the semi-partial correlation squared; r represents the zero-order correlation.
## Square brackets are used to enclose the lower and upper limits of a confidence interval.
##

```

## Situational status independently contributes above and beyond

## state and individual difference effects of status

```
summary(lmer(wow ~ sitstatus+personalclass+(1|State), mrbclean.sit, REML=FALSE))
```

```

## Linear mixed model fit by maximum likelihood t-tests use Satterthwaite
## approximations to degrees of freedom [lmerMod]
## Formula: wow ~ sitstatus + personalclass + (1 | State)
## Data: mrbclean.sit
##
##      AIC      BIC   logLik deviance df.resid
## 2061.0   2083.9 -1025.5  2051.0     725
##
## Scaled residuals:
##      Min       1Q   Median       3Q      Max
## -2.6157 -0.5959  0.0607  0.6527  2.6524
##
## Random effects:
## Groups   Name            Variance Std.Dev.
## State    (Intercept) 0.003007 0.05483
## Residual                    0.969181 0.98447
## Number of obs: 730, groups: State, 47
##
## Fixed effects:
##              Estimate Std. Error      df t value Pr(>|t|)
## (Intercept)  -0.31502    0.10191 417.00000  -3.091 0.002127 **
## sitstatus    -0.10917    0.03216 729.60000  -3.394 0.000726 ***
## personalclass -0.47973    0.15181 558.30000  -3.160 0.001663 **
## ---
## Signif. codes:  0 '***' 0.001 '**' 0.01 '*' 0.05 '.' 0.1 ' ' 1
##
## Correlation of Fixed Effects:
##              (Intr) ststts
## sitstatus    0.927
## personlclss 0.034 0.063

```

independent effects of situational and individual social status, no interaction.

```

summary(lmer(wow ~ scale(sitstatus,scale=F)*scale(personalclass,scale=F)+
(1|State), mrbclean.sit, REML=FALSE))

```



```

## Linear mixed model fit by maximum likelihood t-tests use Satterthwaite
## approximations to degrees of freedom [lmerMod]
## Formula:
## wow ~ scale(sitstatus, scale = F) * scale(personalclass, scale = F) +
## (1 | State)
## Data: mrbclean.sit
##
##      AIC      BIC   logLik deviance df.resid
##  2062.5   2090.1 -1025.3   2050.5     724
##
## Scaled residuals:
##      Min       1Q   Median       3Q      Max
## -2.60416 -0.59751  0.05577  0.64310  2.66011
##
## Random effects:
## Groups   Name      Variance Std.Dev.
## State    (Intercept) 0.002978 0.05457
## Residual                    0.968638 0.98419
## Number of obs: 730, groups: State, 47
##
## Fixed effects:
##
##                                     Estimate
## (Intercept)                        0.00001126
## scale(sitstatus, scale = F)         -0.10982490
## scale(personalclass, scale = F)     -0.47900076
## scale(sitstatus, scale = F):scale(personalclass, scale = F) 0.08504498
##                                     Std. Error
## (Intercept)                        0.03814722
## scale(sitstatus, scale = F)         0.03217074
## scale(personalclass, scale = F)     0.15176298
## scale(sitstatus, scale = F):scale(personalclass, scale = F) 0.13006774
##                                     df
## (Intercept)                       22.90000000
## scale(sitstatus, scale = F)         729.50000000
## scale(personalclass, scale = F)     558.10000000
## scale(sitstatus, scale = F):scale(personalclass, scale = F) 729.50000000
##                                     t value
## (Intercept)                        0.000
## scale(sitstatus, scale = F)         -3.414
## scale(personalclass, scale = F)     -3.156
## scale(sitstatus, scale = F):scale(personalclass, scale = F) 0.654
##                                     Pr(>|t|)
## (Intercept)                        0.999767
## scale(sitstatus, scale = F)         0.000676 ***
## scale(personalclass, scale = F)     0.001684 **
## scale(sitstatus, scale = F):scale(personalclass, scale = F) 0.513414
## ---
## Signif. codes:  0 '***' 0.001 '**' 0.01 '*' 0.05 '.' 0.1 ' ' 1
##
## Correlation of Fixed Effects:
##          (Intr) scl(s,s=F) scl(p,s=F)
## scl(st,s=F) 0.000

```

```
## scl(pr,s=F) -0.002 0.063
## s(,s=F):s=F 0.062 -0.032 0.007
```

# TEST MEDIATION THROUGH CLOSENESS

(lower status associated with greater closeness to the others involved in the incident) (higher status associated with less closeness to others involved in the incident)

```
status.Wclass.meddv<-lm(wow ~ sitstatus +closebefor, data=mrbclean.sit)
```

## effect of lower status and greater closeness.

```
summary(status.Wclass.meddv)
```

```
##
## Call:
## lm(formula = wow ~ sitstatus + closebefor, data = mrbclean.sit)
##
## Residuals:
##      Min       1Q   Median       3Q      Max
## -2.64557 -0.58993 -0.00291  0.61525  2.78294
##
## Coefficients:
##              Estimate Std. Error t value Pr(>|t|)
## (Intercept) -0.64540    0.12139  -5.317 0.000000141 ***
## sitstatus   -0.08771    0.03194  -2.746  0.00618 **
## closebefor  0.22835    0.04496   5.079 0.000000483 ***
## ---
## Signif. codes:  0 '***' 0.001 '**' 0.01 '*' 0.05 '.' 0.1 ' ' 1
##
## Residual standard error: 0.9775 on 727 degrees of freedom
## Multiple R-squared:  0.04712, Adjusted R-squared:  0.0445
## F-statistic: 17.98 on 2 and 727 DF, p-value: 0.0000002399
```

```
status.Wclass.dv<-lm(wow ~ sitstatus , data=mrbclean.sit)
status.Wclass.med<-lm(closebefor ~ sitstatus, data=mrbclean.sit)
```

## Effect of status on closeness

```
summary(status.Wclass.med)
```

```
##
## Call:
## lm(formula = closebefor ~ sitstatus, data = mrbclean.sit)
##
## Residuals:
##      Min       1Q   Median       3Q      Max
## -0.8210 -0.7009 -0.5807  0.3592  2.4193
##
## Coefficients:
##              Estimate Std. Error t value      Pr(>|t|)
## (Intercept)  1.52063    0.08269   18.39 <0.0000000000000002 ***
## sitstatus   -0.06008    0.02624   -2.29    0.0223 *
## ---
## Signif. codes:  0 '***' 0.001 '**' 0.01 '*' 0.05 '.' 0.1 ' ' 1
##
## Residual standard error: 0.8058 on 728 degrees of freedom
## Multiple R-squared:  0.007153, Adjusted R-squared:  0.005789
## F-statistic: 5.245 on 1 and 728 DF, p-value: 0.0223
```

```
result.mediation<-mediate(status.Wclass.med,status.Wclass.meddv, treat = "sitstatus",
mediator = "closebefor", sims = 3000)
```

## sig mediation of status on wise reasoning via closeness - note, it is partial -

there is a direct effect of status as well.

```
summary.mediate(result.mediation)
```

```
##
## Causal Mediation Analysis
##
## Quasi-Bayesian Confidence Intervals
##
##              Estimate 95% CI Lower 95% CI Upper p-value
## ACME             -0.01376   -0.02843   -0.00187   0.02
## ADE              -0.08783   -0.15017   -0.02306   0.01
## Total Effect    -0.10159   -0.16513   -0.03615   0.00
## Prop. Mediated  0.12972     0.01916     0.40170   0.02
##
## Sample Size Used: 730
##
##
## Simulations: 3000
```

```
plot.mediate(result.mediation)
```

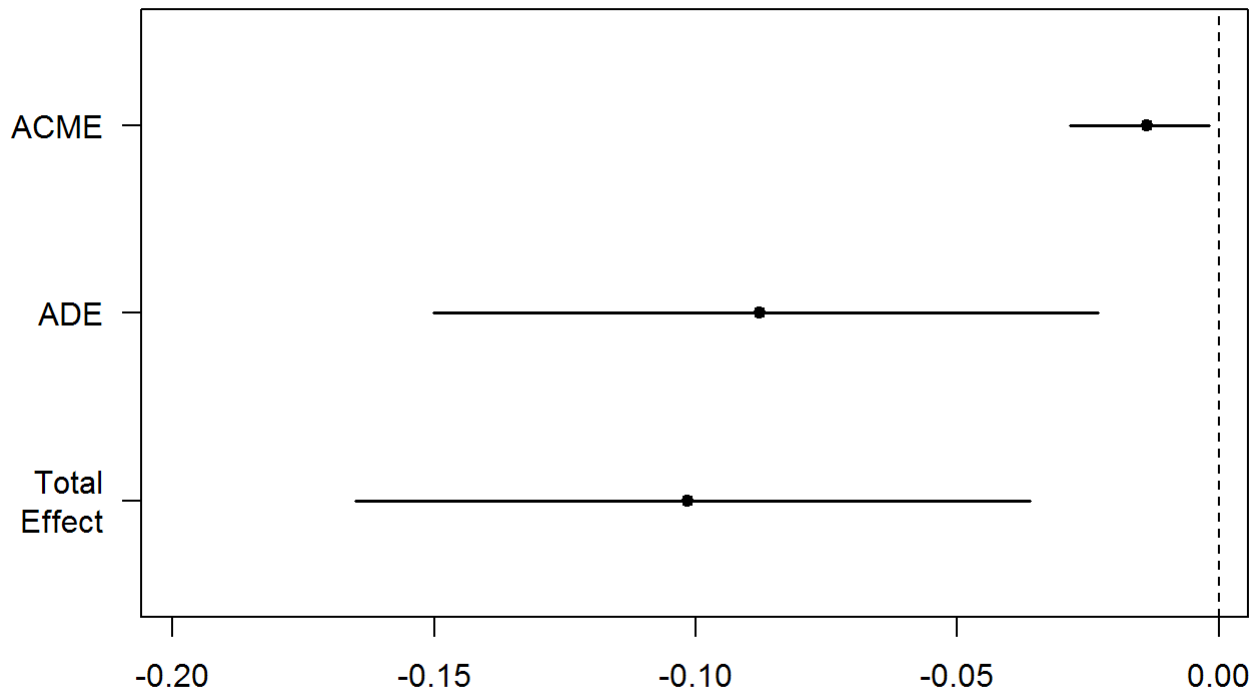

## sub-dimension analyses

HUMILITY

```
status.Wclass.meddv1<-lm(humility ~ sitstatus +closebefor, data=mrbclean.sit)
```

effect of status and closeness on humility.

```
summary(status.Wclass.meddv1)
```

```
##
## Call:
## lm(formula = humility ~ sitstatus + closebefor, data = mrbclean.sit)
##
## Residuals:
##      Min       1Q   Median       3Q      Max
## -1.96575 -0.50874  0.01655  0.50168  2.05254
##
## Coefficients:
##              Estimate Std. Error t value    Pr(>|t|)
## (Intercept) -0.55622    0.09983  -5.571 0.0000000356 ***
## sitstatus   -0.06997    0.02627  -2.664  0.0079 **
## closebefor   0.17134    0.03698   4.634 0.0000042507 ***
## ---
## Signif. codes:  0 '***' 0.001 '**' 0.01 '*' 0.05 '.' 0.1 ' ' 1
##
## Residual standard error: 0.8039 on 727 degrees of freedom
## Multiple R-squared:  0.04074,    Adjusted R-squared:  0.03811
## F-statistic: 15.44 on 2 and 727 DF,  p-value: 0.000002711
```

```
status.Wclass.dv1<-lm(humility ~ sitstatus, data=mrbclean.sit)
result.mediation1<-mediate(status.Wclass.med,status.Wclass.meddv1, treat = "sitstatus",
                           mediator = "closebefor", sims = 2000)
```

## sig mediation of status on humility via closeness

note, it is partial - there is a direct effect of status as well.

```
summary.mediate(result.mediation1)
```

```
##
## Causal Mediation Analysis
##
## Quasi-Bayesian Confidence Intervals
##
##              Estimate 95% CI Lower 95% CI Upper p-value
## ACME           -0.01031   -0.02146   -0.00103   0.02
## ADE            -0.07056   -0.12412   -0.02019   0.01
## Total Effect  -0.08087   -0.13466   -0.03041   0.00
## Prop. Mediated 0.12439     0.01376     0.38915   0.03
##
## Sample Size Used: 730
##
##
## Simulations: 2000
```

```
plot.mediate(result.mediation1)
```

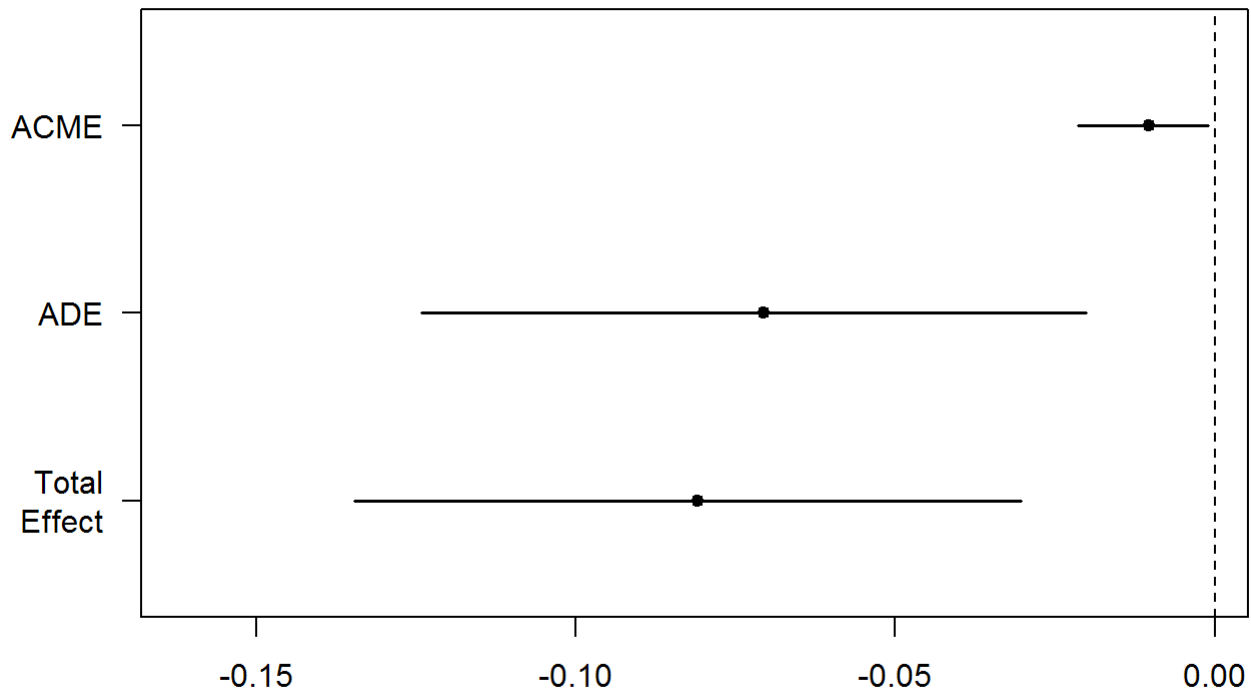

CHANGE

```
status.Wclass.meddv2<-lm(change ~ sitstatus +closebefor, data=mrbclean.sit)
```

effect of status and closeness on recognition of change.

```
summary(status.Wclass.meddv2)
```

```
##
## Call:
## lm(formula = change ~ sitstatus + closebefor, data = mrbclean.sit)
##
## Residuals:
##      Min       1Q   Median       3Q      Max
## -2.16760 -0.51569  0.03445  0.55636  2.10098
##
## Coefficients:
##              Estimate Std. Error t value    Pr(>|t|)
## (Intercept) -0.59456    0.10229  -5.813 0.00000000921 ***
## sitstatus   -0.06866    0.02691  -2.551  0.010937 *
## closebefor  0.14387    0.03788   3.798  0.000158 ***
## ---
## Signif. codes:  0 '***' 0.001 '**' 0.01 '*' 0.05 '.' 0.1 ' ' 1
##
## Residual standard error: 0.8237 on 727 degrees of freedom
## Multiple R-squared:  0.03032,    Adjusted R-squared:  0.02765
## F-statistic: 11.37 on 2 and 727 DF,  p-value: 0.00001378
```

```
status.Wclass.dv2<-lm(change ~ sitstatus , data=mrbclean.sit)
result.mediation2<-mediate(status.Wclass.med,status.Wclass.meddv2, treat = "sitstatus",
                           mediator = "closebefor", sims = 2000)
```

## sig mediation of status on change via closeness

note, it is partial - there is a direct effect of status as well.

```
summary.mediate(result.mediation2)
```

```
##
## Causal Mediation Analysis
##
## Quasi-Bayesian Confidence Intervals
##
##              Estimate 95% CI Lower 95% CI Upper p-value
## ACME            -0.00871   -0.01892   -0.00129   0.02
## ADE             -0.06821   -0.12153   -0.01729   0.01
## Total Effect   -0.07692   -0.13094   -0.02642   0.00
## Prop. Mediated  0.10819     0.01541     0.38113   0.02
##
## Sample Size Used: 730
##
##
## Simulations: 2000
```

```
plot.mediate(result.mediation2)
```

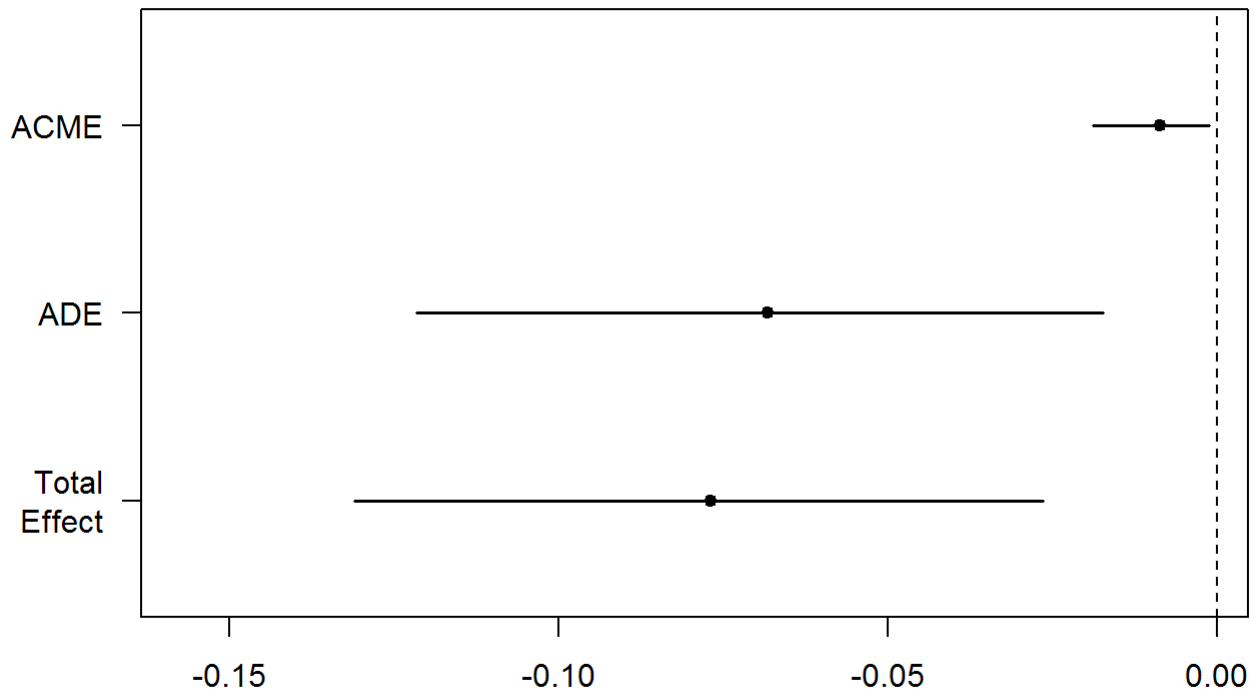

PERSP

```
status.Wclass.meddv3<-lm(persp ~ sitstatus +closebefor, data=mrbclean.sit)
```

## effect of status and closeness on consideration of others' perspectives

```
summary(status.Wclass.meddv3)
```



```
##
## Call:
## lm(formula = persp ~ sitstatus + closebefor, data = mrbclean.sit)
##
## Residuals:
##      Min       1Q   Median       3Q      Max
## -1.72770 -0.43766  0.01806  0.49199  1.92984
##
## Coefficients:
##              Estimate Std. Error t value      Pr(>|t|)
## (Intercept) -0.59647    0.08653  -6.893 0.00000000000119 ***
## sitstatus   -0.05891    0.02277  -2.588   0.00986 **
## closebefor   0.17131    0.03205   5.345 0.0000001210497 ***
## ---
## Signif. codes:  0 '***' 0.001 '**' 0.01 '*' 0.05 '.' 0.1 ' ' 1
##
## Residual standard error: 0.6968 on 727 degrees of freedom
## Multiple R-squared:  0.04952,    Adjusted R-squared:  0.04691
## F-statistic: 18.94 on 2 and 727 DF,  p-value: 0.0000000096
```

```
status.Wclass.dv3<-lm(persp ~ sitstatus , data=mrbclean.sit)
result.mediation3<-mediate(status.Wclass.med,status.Wclass.meddv3, treat = "sitstatus",
                           mediator = "closebefor", sims = 2000)
```

## sig mediation of status on perspective-taking via closeness

note, it is partial - there is a direct effect of status as well

```
summary.mediate(result.mediation3)
```

```
##
## Causal Mediation Analysis
##
## Quasi-Bayesian Confidence Intervals
##
##              Estimate 95% CI Lower 95% CI Upper p-value
## ACME             -0.01039   -0.02128   -0.00165   0.02
## ADE              -0.05868   -0.10325   -0.01106   0.01
## Total Effect    -0.06907   -0.11364   -0.02103   0.00
## Prop. Mediated  0.14784     0.02160     0.47946   0.02
##
## Sample Size Used: 730
##
##
## Simulations: 2000
```

```
plot.mediate(result.mediation3)
```

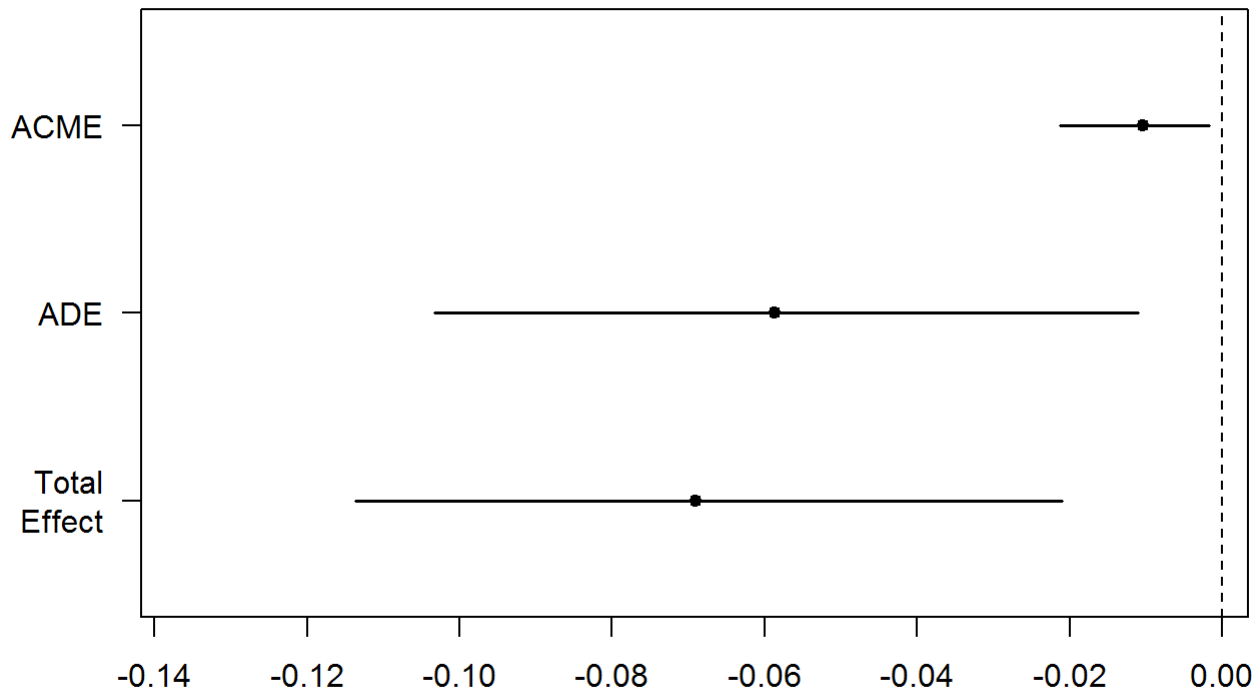

COMPR/RES

```
status.Wclass.meddv4<-lm(comprres ~ sitstatus +closebefor, data=mrbclean.sit)
```

## effect of status and closeness on compromise/search for resolution

```
summary(status.Wclass.meddv4)
```

```
##
## Call:
## lm(formula = comprpres ~ sitstatus + closebefor, data = mrbclean.sit)
##
## Residuals:
##      Min       1Q   Median       3Q      Max
## -2.14104 -0.48388  0.03849  0.52401  2.15720
##
## Coefficients:
##              Estimate Std. Error t value      Pr(>|t|)
## (Intercept) -0.66414    0.09970  -6.661 0.00000000000536 ***
## sitstatus   -0.06585    0.02623  -2.510   0.0123 *
## closebefor   0.18725    0.03693   5.071 0.0000005025867 ***
## ---
## Signif. codes:  0 '***' 0.001 '**' 0.01 '*' 0.05 '.' 0.1 ' ' 1
##
## Residual standard error: 0.8028 on 727 degrees of freedom
## Multiple R-squared:  0.0452, Adjusted R-squared:  0.04257
## F-statistic: 17.21 on 2 and 727 DF,  p-value: 0.0000004991
```

```
status.Wclass.dv4<-lm(comprpres ~ sitstatus , data=mrbclean.sit)
result.mediation4<-mediate(status.Wclass.med,status.Wclass.meddv4, treat = "sitstatus",
                           mediator = "closebefor", sims = 2000)
```

## sig mediation of status on compromise via closeness

note, it is partial - there is a direct effect of status as well.

```
summary.mediate(result.mediation4)
```

```
##
## Causal Mediation Analysis
##
## Quasi-Bayesian Confidence Intervals
##
##              Estimate 95% CI Lower 95% CI Upper p-value
## ACME             -0.01141   -0.02262   -0.00186   0.01
## ADE              -0.06548   -0.11606   -0.01680   0.01
## Total Effect    -0.07689   -0.13032   -0.02685   0.01
## Prop. Mediated  0.14613     0.02520     0.42753   0.02
##
## Sample Size Used: 730
##
##
## Simulations: 2000
```

```
plot.mediate(result.mediation4)
```

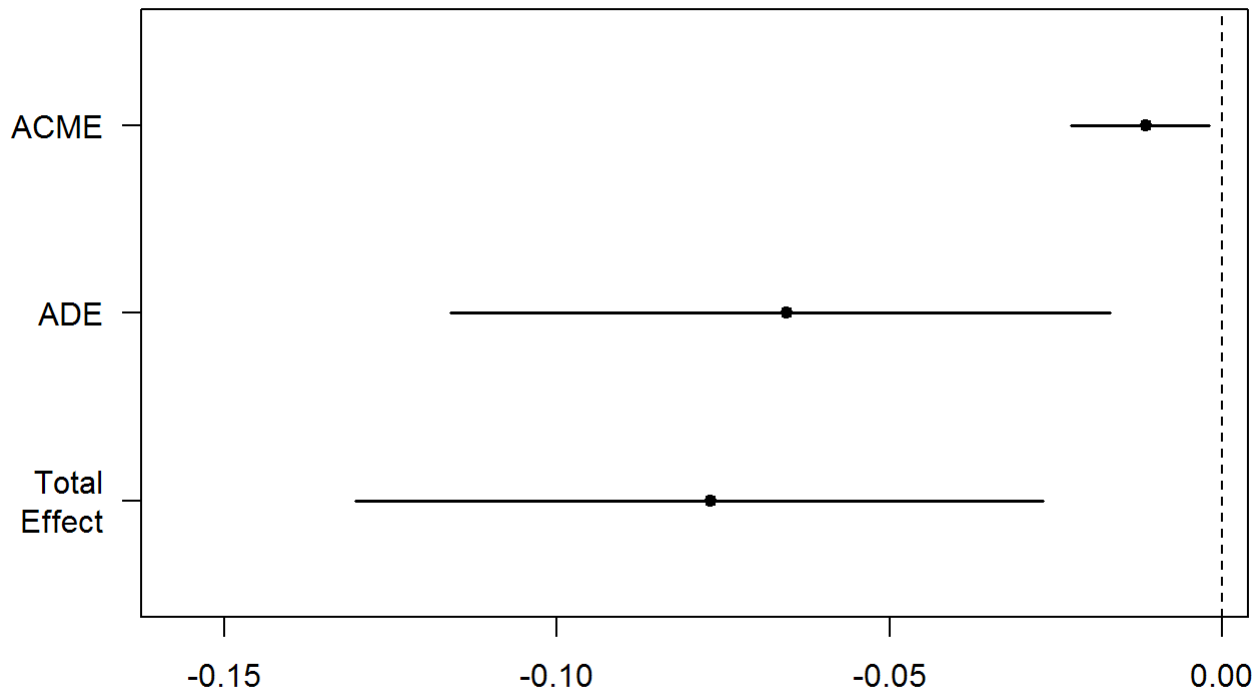

OUTSIDER

```
status.Wclass.meddv5<-lm(outsider ~ sitstatus +closebefor, data=mrbclean.sit)
```

## effect of status and marg effect of closeness on outsider viewpoint

```
summary(status.Wclass.meddv5)
```

```
##
## Call:
## lm(formula = outsider ~ sitstatus + closebefor, data = mrbclean.sit)
##
## Residuals:
##      Min       1Q   Median       3Q      Max
## -1.94630 -0.62900  0.03881  0.69369  2.08937
##
## Coefficients:
##              Estimate Std. Error t value Pr(>|t|)
## (Intercept) -0.31144    0.11627  -2.679  0.00756 **
## sitstatus   -0.07319    0.03059  -2.393  0.01698 *
## closebefor   0.08026    0.04306   1.864  0.06276 .
## ---
## Signif. codes:  0 '***' 0.001 '**' 0.01 '*' 0.05 '.' 0.1 ' ' 1
##
## Residual standard error: 0.9362 on 727 degrees of freedom
## Multiple R-squared:  0.0136, Adjusted R-squared:  0.01089
## F-statistic: 5.012 on 2 and 727 DF,  p-value: 0.00689
```

```
status.Wclass.dv5<-lm(outsider ~ sitstatus , data=mrbclean.sit)
result.mediation5<-mediate(status.Wclass.med,status.Wclass.meddv5, treat = "sitstatus",
                           mediator = "closebefor", sims = 2000)
```

## marginal mediation of status on outsider perspective via closeness

note, the proportion mediated is above 5%

```
summary.mediate(result.mediation5)
```

```
##
## Causal Mediation Analysis
##
## Quasi-Bayesian Confidence Intervals
##
##              Estimate 95% CI Lower 95% CI Upper p-value
## ACME           -0.004936  -0.013193    0.000337  0.08
## ADE            -0.072415  -0.130046   -0.012994  0.02
## Total Effect   -0.077352  -0.137015   -0.018102  0.01
## Prop. Mediated  0.057283  -0.007091    0.284872  0.09
##
## Sample Size Used: 730
##
##
## Simulations: 2000
```

```
plot.mediate(result.mediation5)
```

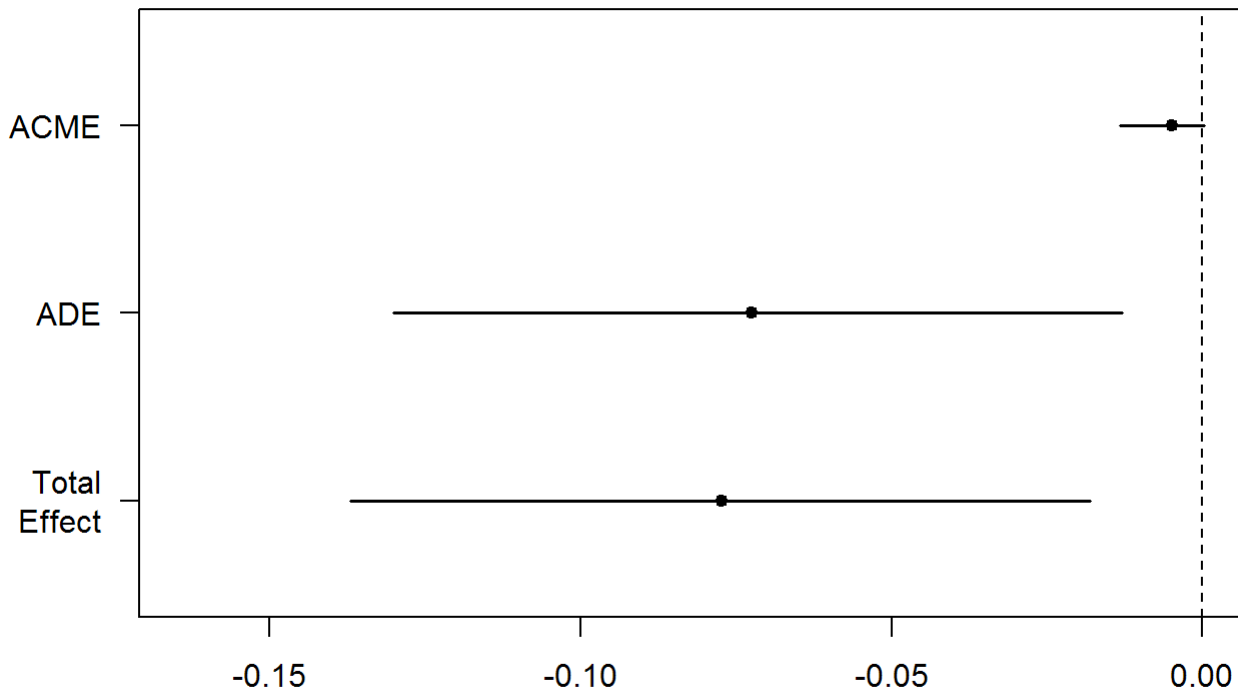

## FIGURES FOR THE PAPER

### State-level Status and Wise Reasoning across U.S. Regions

```
A1<-ggplot(estimatesStateclean, aes(x=stateclass, y=wow))
A2<-A1+geom_point(aes(size = n, colour=Region)) +
  geom_smooth(method=lm)+ # Add linear regression line
  scale_color_brewer(palette="Dark2")+
  theme_classic() +labs(x = "Status of the State (z-score)",
                        y = "Wise Reasoning Index (z-score)")
A2+theme(legend.position="right")+guides(colour=guide_legend(override.aes=list(size=4)))
```

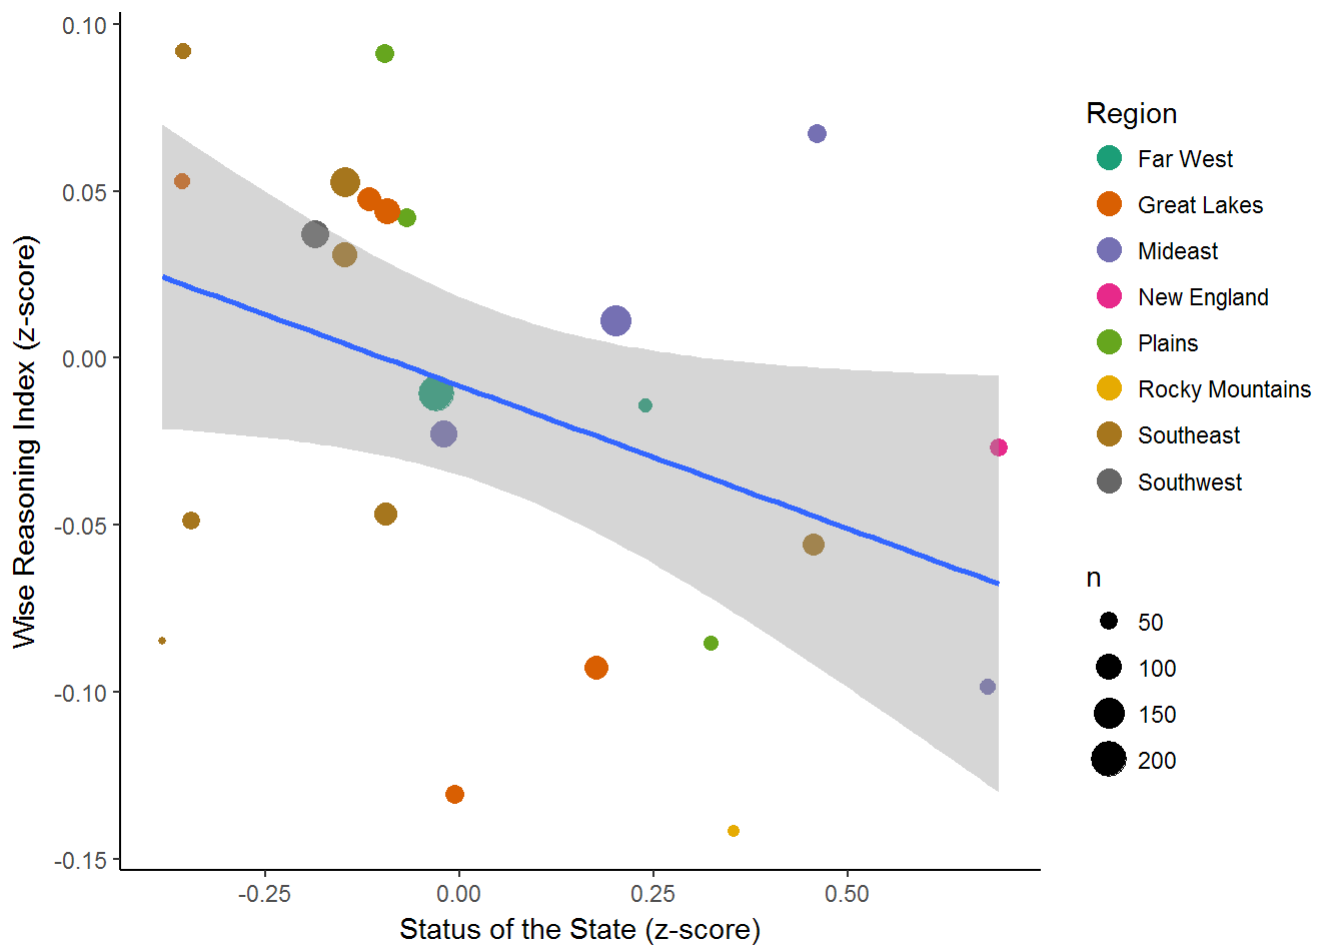

## Individual-level Status and Wise Reasoning

```
ggplot(mrbclean, aes(x=personalclass, y=wow)) +
  geom_point(alpha = 1/6, size = 4) +
  geom_smooth(method=loess)+ # Add Linear regression line
  theme_classic() +labs(x = "Individual Differences in Social Class (z-score)",
    y = "Wise Reasoning Index (z-score)")
```

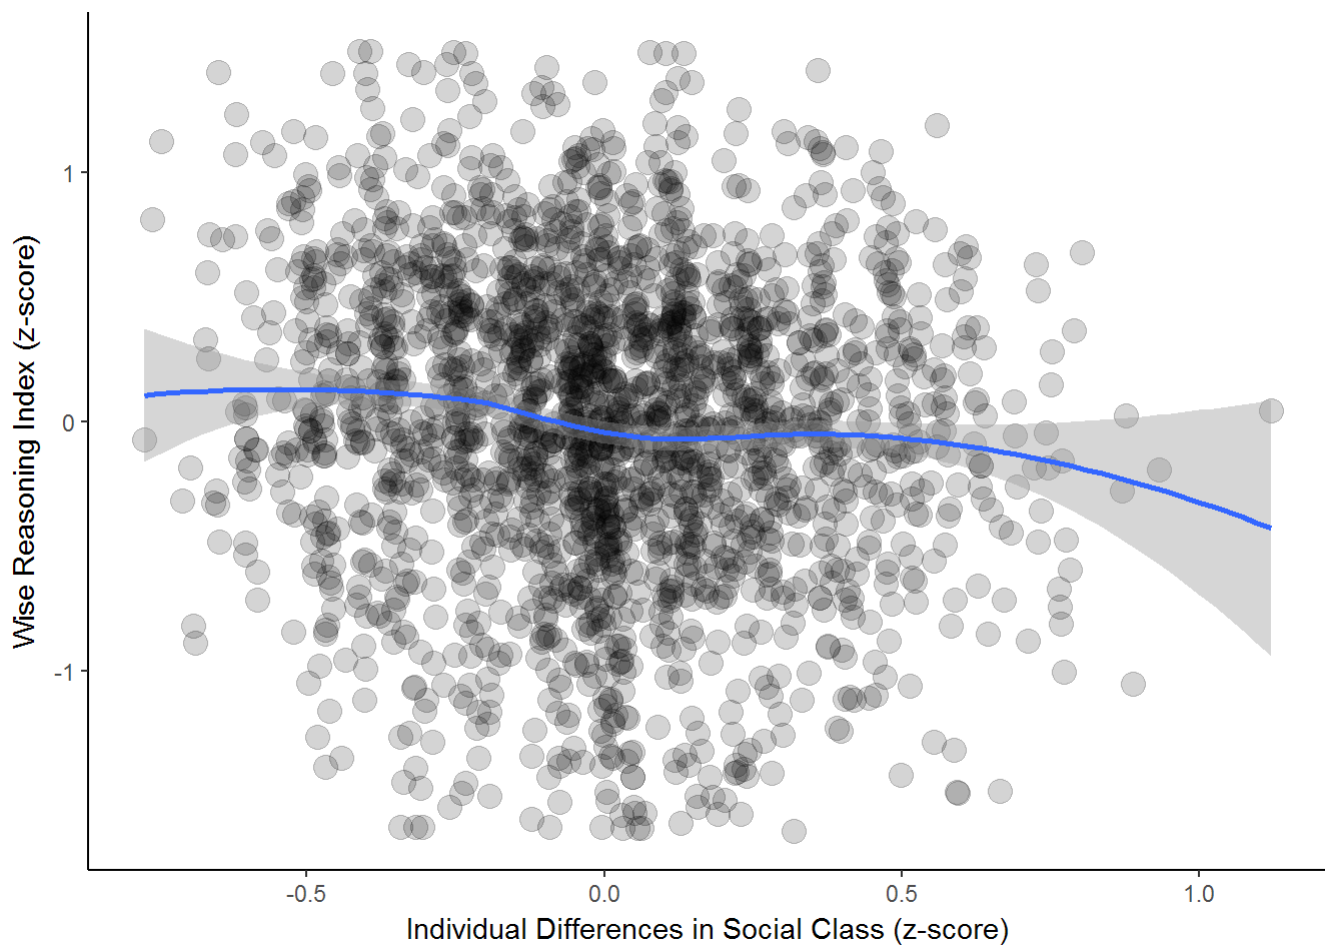

## Situation-specific Status and Wise Reasoning

```

mrbcleanplot <- subset(mrbclean.sit, sitstatusOR == "Much Less" | sitstatusOR == "Less" | sitstatusOR =
=="Same/Similar" |
sitstatusOR == "More" | sitstatusOR == "Much More",
select=c(wow, sitstatusOR))
C1 <- ggplot(mrbcleanplot, aes(x=sitstatusOR, y=wow, color=sitstatusOR)) +
  geom_violin(trim=FALSE, draw_quantiles = c(0.25, 0.5, 0.75), fill='gray')
C1 + scale_colour_brewer(palette = "Dark2") + theme_classic() + theme(legend.position="none") +
  scale_fill_distiller(guide = "colourbar") + geom_boxplot(width=0.1, color="black") +
  labs(x = "Personal vs. Others' Status in a Situation",
  y = "Wise Reasoning Index (z-score)")

```



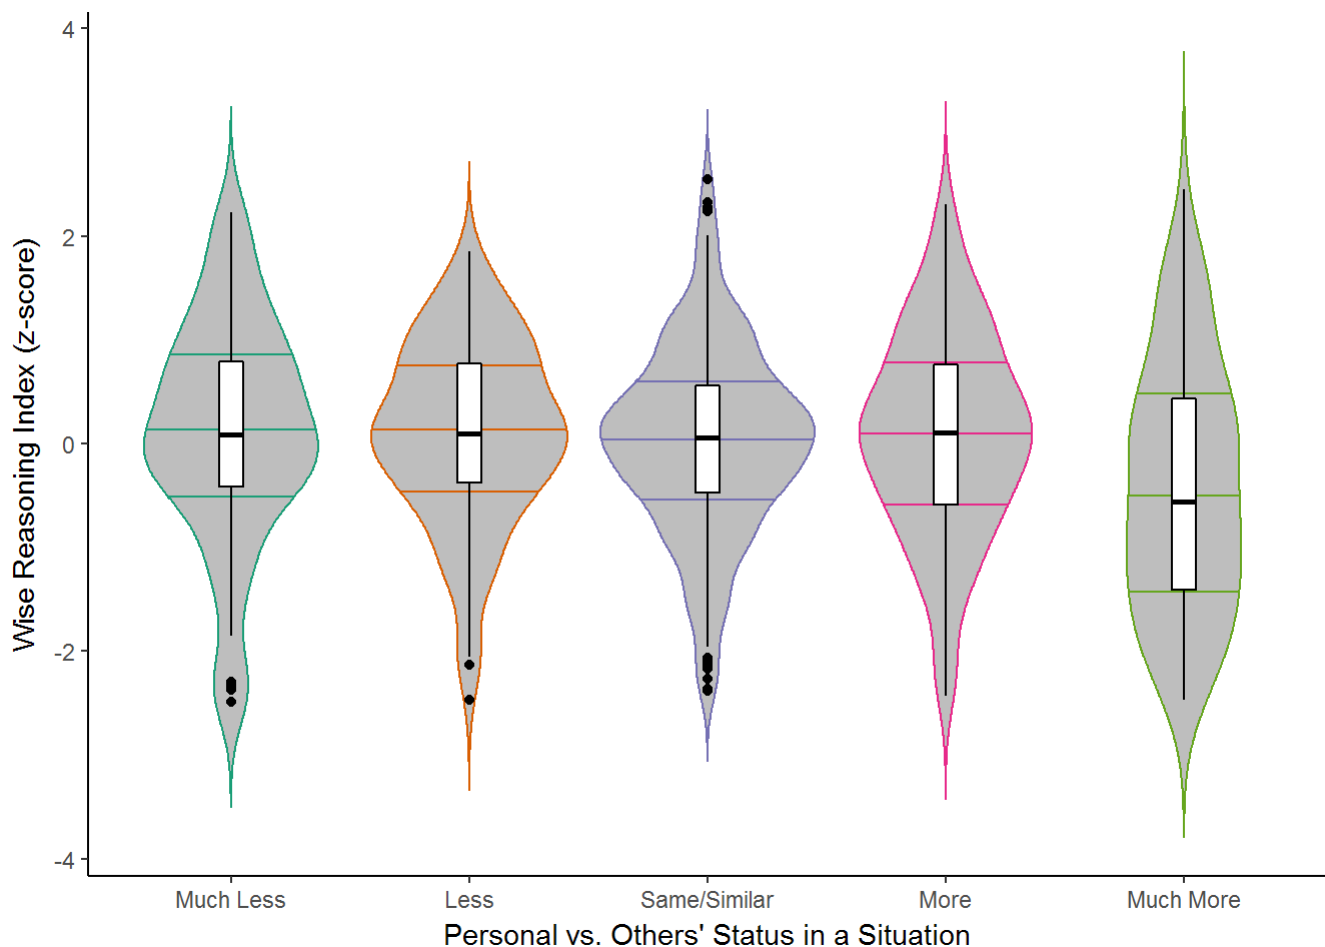

## Situation-specific Status and Wise Reasoning - Means and St. Errors - ALTERNATIVE FOR SUPPLEMENT

```

mrbclean.sum <- lm(scale(Normalize(wow))~sitstatusOR,mrbclean.sit)

mrbcleanplot1<-summary(lsmmeans(mrbclean.sum, ~sitstatusOR))
mrbcleanplot1<-as.data.frame(mrbcleanplot1)
ggplot(mrbcleanplot1, aes(x=sitstatusOR, y=lsmmean, fill=sitstatusOR)) +
  geom_bar(stat="identity", color="black", position=position_dodge()) +
  scale_fill_brewer(palette = "Dark2")+
  geom_errorbar(aes(ymin=lsmmean-SE, ymax=lsmmean+SE), width=.2,
                position=position_dodge(.9))+scale_colour_brewer(palette = "Dark2")+
  theme_classic()+ theme(legend.position="none")+
  labs(x = "Personal vs. Others' Status in a Situation",
       y = "M +/- S.E. (Wise Reasoning Index: z-score)")

```

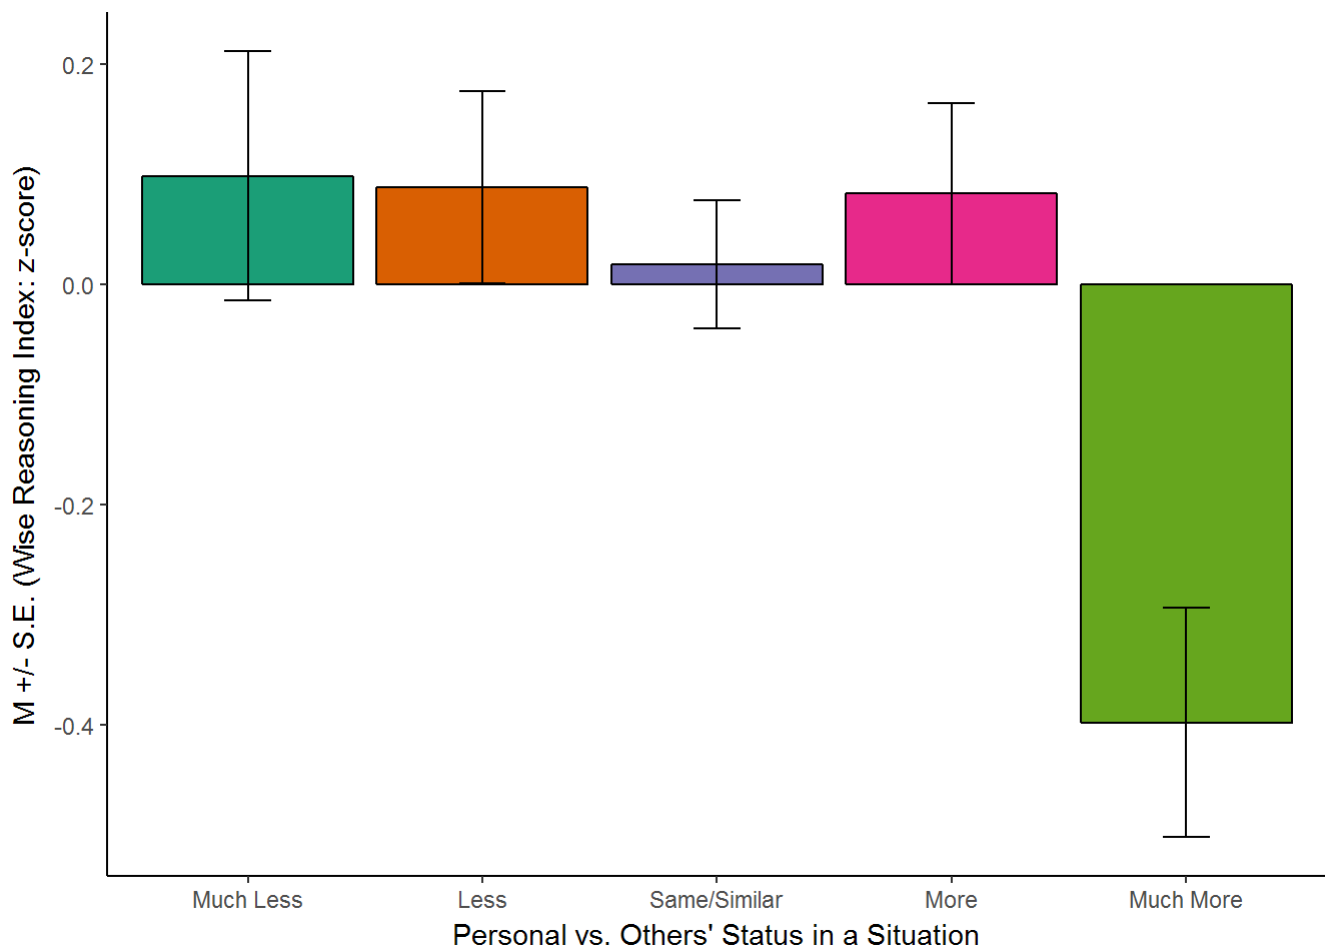

## Study 2: PNAS by Grossmann et al., 2010

```
pnas<-read.spss(choose.files(), to.data.frame=TRUE, use.value.labels=T)
```

```
## Warning in read.spss(choose.files(), to.data.frame = TRUE, use.value.labels
## = T): C:\Users\igrossma\Google Drive\Drive\scales\social class\OLD wis
## PNAS data 19 Aug 2017.short.sav: Unrecognized record type 7, subtype 17
## encountered in system file
```

```
## Warning in read.spss(choose.files(), to.data.frame = TRUE, use.value.labels
## = T): C:\Users\igrossma\Google Drive\Drive\scales\social class\OLD wis
## PNAS data 19 Aug 2017.short.sav: Unrecognized record type 7, subtype 18
## encountered in system file
```

```
pnas.clean<-subset(pnas,edu_4!="NA"&age<40)
```

```
pnas.sum <- lm(scale((wisdom.interpersonal))~edu_4+WC.interpersonal.mean+ IQ.c+IQ.f+gender,pnas.clean)
```

```
pnasplot1<-summary(lsmmeans(pnas.sum, ~edu_4))
```

```
pnasplot1<-as.data.frame(pnasplot1)
```

```
ggplot(pnasplot1, aes(x=edu_4, y=lsmmean, fill=edu_4)) +  
  geom_bar(stat="identity", color="black", position=position_dodge()) +  
  scale_fill_brewer(palette = "Dark2")+  
  geom_errorbar(aes(ymin=lsmmean-SE, ymax=lsmmean+SE), width=.2,  
                position=position_dodge(.9))+scale_colour_brewer(palette = "Dark2")+  
  theme_classic()+ theme(legend.position="none")+  
  labs(x = "Level of Education",  
       y = "M +/- S.E. (Wise Reasoning Index: z-score)")
```

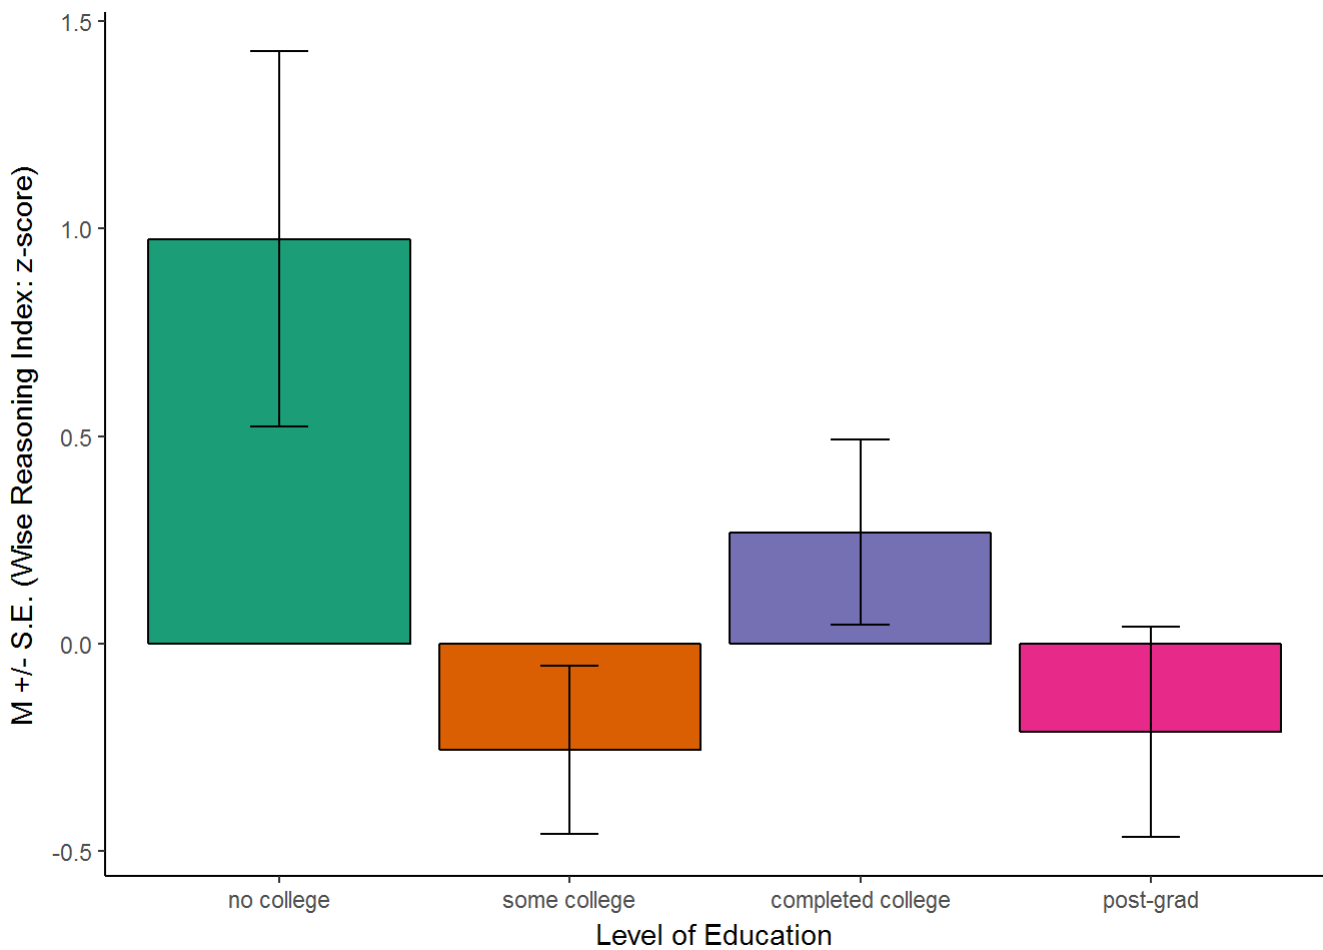

```

pnascleanplot <- subset(pnas.clean, edu_4 == "no college" | edu_4 == "some college" | edu_4 == "complete
d college" |
                        edu_4 == "post-grad", select = c(wisdom.interpersonal, edu_4))

D1 <- ggplot(pnascleanplot, aes(x = edu_4, y = scale(wisdom.interpersonal), color = edu_4)) +
  geom_violin(trim = FALSE, draw_quantiles = c(0.25, 0.5, 0.75), fill = 'gray')
D1 + scale_colour_brewer(palette = "Dark2") + theme_classic() + theme(legend.position = "none") +
  scale_fill_distiller(guide = "colourbar") + geom_boxplot(width = 0.1, color = "black") +
  labs(x = "Level of Education",
       y = "Wise Reasoning Index (z-score)")

```

```
## Warning: Removed 20 rows containing non-finite values (stat_ydensity).
```

```
## Warning: Removed 20 rows containing non-finite values (stat_boxplot).
```

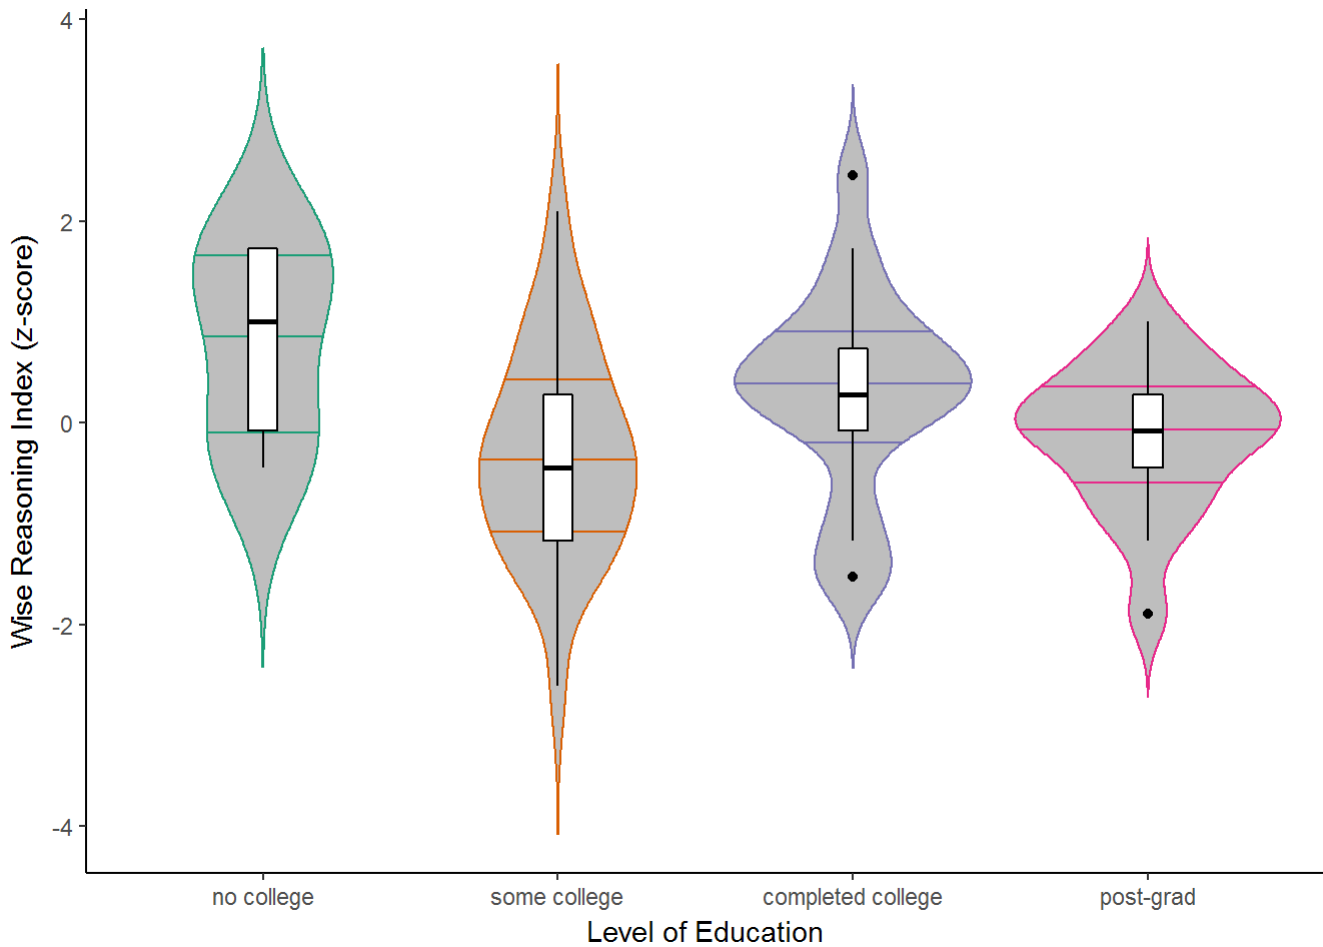

Supplement: rspb20171870supp2.pdf [file rspb20171870supp2.pdf]
